# Supplementary material for: Direct trifluoromethylthiolation of terminal alkynes mediated by a hypervalent trifluoromethylthio-iodine(iii) reagent; boosting effect of fluorinated alcohol
Source: Royal Society of Chemistry journal article supplement (doi:10.1039/d4gc00622d), 2024-01-01

## Supporting Information

### Direct Trifluoromethylthiolation of Terminal Alkynes Mediated by a Hypervalent Trifluoromethylthio-Iodine(III) Reagent; Boosting Effect of Fluorinated Alcohol

Yu-Xin Cheng,<sup>‡</sup> Xiao-Guang Yang,<sup>‡</sup> Feng-Huan Du,<sup>‡</sup> and Chi Zhang\*

State Key Laboratory of Elemento-Organic Chemistry, The Research Institute of  
Elemento-Organic Chemistry, College of Chemistry, Nankai University, Tianjin  
300071, China

zhangchi@nankai.edu.cn

## Table of Contents

|                                                                                                              |    |
|--------------------------------------------------------------------------------------------------------------|----|
| General information .....                                                                                    | 2  |
| 1. General procedure for the preparation of hypervalent trifluoromethylthio-iodine(III)<br>reagent TFTI..... | 3  |
| 2. Optimization of Reaction Conditions.....                                                                  | 4  |
| 2.1 Conditional Screening.....                                                                               | 4  |
| 3. General procedure for direct trifluoromethylthiolation of terminal alkynes.....                           | 4  |
| 3.1 General Procedure A (GP A) .....                                                                         | 4  |
| 3.2 General Procedure B (GP B).....                                                                          | 5  |
| 3.2 General Procedure B (GP C).....                                                                          | 5  |
| 4. Characterization of the obtained products.....                                                            | 5  |
| 5. Comparative results of reactivity of other trifluoromethylthio transfer reagents ....                     | 13 |
| 6. Recovery of PFTB and <i>N</i> -acetyl-2-iodobenzamide .....                                               | 13 |
| 7. A KIE experiment .....                                                                                    | 14 |
| 8. Transformations of Products .....                                                                         | 14 |
| Nuclear overhauser effect spectroscopy of 4 .....                                                            | 15 |
| 9. Details of DFT calculations for the mechanism.....                                                        | 16 |
| 9.1 Energy comparison and non-covalent interaction analysis of TS2 and TS2' .....                            | 17 |
| References .....                                                                                             | 46 |
| NMR Spectra of Corresponding Compounds .....                                                                 | 51 |

**General information.**  $^1\text{H}$ ,  $^{13}\text{C}$ , and  $^{19}\text{F}$  NMR were recorded on the Bruker AV 400 (400 MHz, 100 MHz, and 376 MHz, respectively).  $^1\text{H}$  NMR chemical shifts were determined relative to internal standard TMS ( $\delta = 0.0$  ppm),  $^{13}\text{C}$  NMR chemical shifts were determined relative to the deuterated solvents, and  $^{19}\text{F}$  NMR chemical shifts were determined relative to inter-standard  $\text{PhCF}_3$  ( $\delta = -62.8$  ppm). Chemical shifts ( $\delta$ ) were reported in ppm, and coupling constants ( $J$ ) were in Hertz (Hz). The following abbreviations were used to explain the multiplicities: s = singlet, d = doublet, t = triplet, q = quartet, m = multiple, br = broad. Mass spectra were acquired on Q Exactive GC-Orbitrap MS (EI), and Varian 7.0T FTMS (ESI). IR spectra were obtained on a Bruker Alpha FT-IR Spectrometer. Reactions were monitored by thin-layer chromatography (TLC) carried out on Huanghai HSGF254 plates. Preparative TLC was performed on Xincheng GF254 preparative TLC plates. Silica gel (200-300 mesh) was purchased from Anhui Liangchen Co., China.

**Materials:** All solvents were purified according to the purification handbook *Purification of Laboratory Chemicals* before use. Unless otherwise noted, other reagents and starting materials were purchased from commercial sources and used as received.

## 1. General procedure for the preparation of hypervalent trifluoromethylthio-iodine(III) reagent TFTI

AgSCF<sub>3</sub> was prepared according to the reported literature.<sup>[1]</sup>

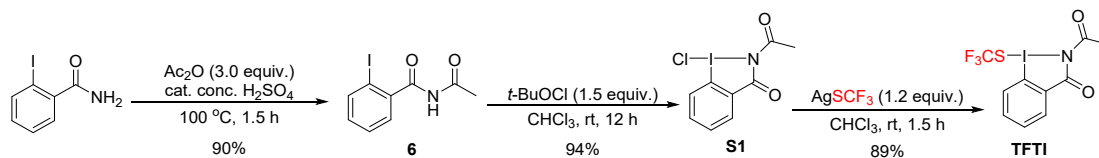

2-iodobenzamide (11.86 g, 48 mmol, 1.0 equiv.), acetic anhydride (20 mL, 144 mmol, 3.0 equiv.), and 8 drops of conc. H<sub>2</sub>SO<sub>4</sub> were placed into a high-pressure autoclave equipped with a stirring bar. The reaction mixture was stirred in an oil bath at 100 °C for 1.5 h. When the reaction was complete, EtOAc (200 mL) was added and the brown solution was washed with saturated NaHCO<sub>3</sub> aq. (3 × 50 mL). The combined organic phase was dried over MgSO<sub>4</sub>, filtered, and the solvent was removed under reduced pressure. The crude mixture was purified by flash column chromatography (Eluent: EtOAc: petroleum ether = 1:3) to give of *N*-acetyl-2-iodobenzamide **6** (12.5 g) in 90% yield as a colorless solid. <sup>1</sup>H NMR (400 MHz, CDCl<sub>3</sub>) δ 8.92 (br, 1H), 7.86 (d, *J* = 7.9 Hz, 1H), 7.39 (d, *J* = 4.4 Hz, 2H), 7.15-7.11 (m, 1H), 2.49 (s, 3H); <sup>13</sup>C NMR (100 MHz, CDCl<sub>3</sub>) δ 172.6, 167.8, 140.1, 139.9, 132.0, 128.2, 128.1, 91.9, 25.3 ppm.

*t*-BuOCl (4.88 g, 45 mmol, 1.5 equiv.) was added to a solution of **6** (8.67 g, 30 mmol, 1.0 equiv.) in 40 mL CHCl<sub>3</sub>. The reaction mixture was stirred at room temperature for 12 h in dark under air. When the reaction was complete, the precipitate was filtered and washed with Et<sub>2</sub>O (4 × 10 mL) to give 2-acetyl-1-chloro-1,2-dihydro-3H-1λ<sup>3</sup>-benzo[d][1,2]iodazol-3-one **S1** (9.1 g) in 94% yield as a colorless solid. <sup>1</sup>H NMR (400 MHz, DMSO-*d*<sub>6</sub>) δ 8.43 (d, *J* = 8.3 Hz, 1H), 8.13-8.06 (m, 2H), 7.88 (t, *J* = 7.3 Hz, 1H), 2.56 (s, 3H); <sup>13</sup>C NMR (100 MHz, DMSO-*d*<sub>6</sub>) δ 174.4, 161.9, 136.9, 134.4, 131.8, 131.6, 128.1, 115.0, 25.4 ppm.

AgSCF<sub>3</sub> (6.27 g, 30 mmol, 1.2 equiv.), **S1** (8.08 g, 25 mmol, 1.0 equiv.) were placed into an oven-dried two-necked 100 mL flask equipped with a stirring bar under an argon atmosphere. Then 50 mL of freshly distilled CHCl<sub>3</sub> was added and the reaction was stirred at room temperature in dark for 1.5 h. When the reaction was complete, the precipitate was filtered and washed with DCM (4 × 40 mL). The filtrate was collected and the solvent was removed under reduced pressure. The residue was washed with Et<sub>2</sub>O (3 × 10 mL) to give 2-acetyl-1-((trifluoromethyl)thio)-1,2-dihydro-3H-1λ<sup>3</sup>-

benzo[*d*][1,2]iodazol-3-one **TFTI** (8.7 g) in 89% yield as a colorless solid. <sup>1</sup>H NMR (400 MHz, CDCl<sub>3</sub>) δ 8.48 (d, *J* = 8.4 Hz, 1H), 8.26 (dd, *J* = 7.5 Hz, 1.6, 1H), 7.89 (dt, *J* = 7.2, 1.6 Hz, 1H), 7.79 (t, *J* = 7.2 Hz, 1H), 2.63 (s, 3H); <sup>19</sup>F NMR (376 MHz, CDCl<sub>3</sub>) δ -29.66 (s, 3 F); <sup>13</sup>C NMR (100MHz, CDCl<sub>3</sub>) δ 176.7, 161.3, 136.2, 134.5, 132.4, 131.7, 130.5 (q, *J* = 309.1 Hz), 127.1, 113.1, 26.1 ppm.

## 2. Optimization of Reaction Conditions

### 2.1 Conditional Screening

These results showed that PFTB was the optimal solvent.

**Table S1.** Optimization of Reaction Conditions<sup>a</sup>

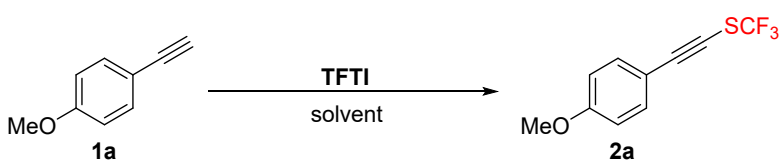

| Entry | TFTI (equiv.) | Solvent (2 mL)     | Temp. (°C) | Time (h) | Yield (%)                 |
|-------|---------------|--------------------|------------|----------|---------------------------|
| 1     | 1.5           | DCE                | 80°C       | 24       | 10%                       |
| 2     | 1.5           | CH <sub>3</sub> CN | rt         | 24       | not detected <sup>b</sup> |
| 3     | 1.5           | TFE                | rt         | 24       | 5 <sup>b</sup>            |
| 4     | 1.5           | HFIP               | rt         | 1        | 71                        |
| 5     | 1.2           | PFTB               | rt         | 1        | 99                        |

<sup>a</sup>Reactions were conducted on 0.2 mmol scale. NMR yields are reported using PhCF<sub>3</sub> as an internal standard. <sup>b</sup>Recovery of starting material is 60%.

## 3. General procedure for direct trifluoromethylthiolation of terminal alkynes

### 3.1 General Procedure A (GP A)

Under an air atmosphere, PFTB (2 mL), terminal alkynes (0.2 mmol, 1.0 equiv.), and TFTI (0.24 mmol, 1.2 equiv.) were added sequentially to a 10 mL round bottom flask with a magnetic stirrer, after which the reaction was stirred at room temperature and monitored by TLC. When the reaction was complete, the solvent was concentrated under reduced pressure. The obtained residue was further purified by flash column chromatography to give the desired product.

### 3.2 General Procedure B (GP B)

Under an air atmosphere, HFIP (2 mL), terminal alkynes (0.2 mmol, 1.0 equiv.), and

TFTI (0.3 mmol, 1.5 equiv.) were added sequentially to a 10 mL round bottom flask with a magnetic stirrer, after which the reaction was stirred at room temperature and monitored by TLC. When the reaction was complete, the solvent was concentrated under reduced pressure. The obtained residue was further purified by flash column chromatography to give the desired product.

### 3.2 General Procedure B (GP C)

Under an air atmosphere, PFTB (2 mL), terminal alkynes (0.2 mmol, 1.0 equiv.), and TFTI (0.6 mmol, 3 equiv.) were added sequentially to a 10 mL sealed tube with a magnetic stirrer, after which the reaction was stirred at 70°C. TFTI (0.2 mmol, 1 equiv.) was added at 24 h intervals (6 equiv. in total) and monitored by TLC. When the reaction was complete, the solvent was concentrated under reduced pressure. The obtained residue was further purified by flash column chromatography to give the desired product.

## 4. Characterization of the obtained products

### ((4-methoxyphenyl)ethynyl)(trifluoromethyl)sulfane 2a

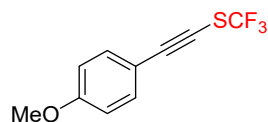

GP A. Colorless oil (99%, Eluent: petroleum ether); GP B. Colorless oil (71%, Eluent: petroleum ether). <sup>1</sup>H NMR (400 MHz, CDCl<sub>3</sub>) δ 7.45 (d, *J* = 9.2 Hz, 2H), 6.86 (d, *J* = 8.8 Hz, 2H), 3.82 (s, 3H); <sup>19</sup>F NMR (376 MHz, CDCl<sub>3</sub>) δ -44.10 (s, 3F); <sup>13</sup>C NMR (100 MHz, CDCl<sub>3</sub>) δ 160.9, 134.4, 128.2 (q, *J* = 310.4 Hz), 114.1, 113.5, 101.5, 65.1 (q, *J* = 4.3 Hz), 55.3 ppm. The characterization data were in accordance with reported ones. [2]

### ((3-methoxyphenyl)ethynyl)(trifluoromethyl)sulfane 2b

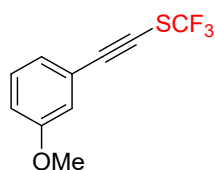

GP A (TFTI 2.0 equiv.) Pale yellow oil (99%, Eluent: petroleum ether) <sup>1</sup>H NMR (400 MHz, CDCl<sub>3</sub>) δ 7.24 (t, *J* = 7.9 Hz, 1 H), 7.08 (dt, *J* = 7.6, 1.1 Hz, 1 H), 6.99 (dd, *J* = 2.3, 1.5 Hz, 1 H), 6.94 (ddd, *J* = 8.4, 2.6, 0.9 Hz, 1 H), 3.79 (s, 3 H); <sup>19</sup>F NMR (376 MHz, CDCl<sub>3</sub>): δ -43.56 (s, 3 F); <sup>13</sup>C NMR (100 MHz, CDCl<sub>3</sub>) δ 159.4, 129.6, 128.1 (q, *J* = 312.5 Hz), 124.7, 122.4, 116.8, 116, 101.2, 66.5 (q, *J* = 4.4 Hz), 55.3 ppm. The characterization data were in accordance with reported ones. [3]

### ((2-methoxyphenyl)ethynyl)(trifluoromethyl)sulfane 2c

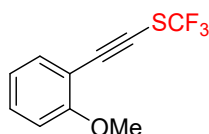

GP A (TFTI 1.5 equiv.) Pale yellow oil (99%, Eluent: petroleum ether)  $^1\text{H}$  NMR (400 MHz,  $\text{CDCl}_3$ )  $\delta$  7.45 (dd,  $J = 7.6, 1.7$  Hz, 1 H), 7.36 (ddd,  $J = 8.4, 7.6, 1.7$  Hz, 1 H), 6.93 (td,  $J = 7.5, 0.9$  Hz, 1 H), 6.89 (d,  $J = 8.4$  Hz, 1 H), 3.89 (s, 3 H);  $^{19}\text{F}$  NMR (376 MHz,  $\text{CDCl}_3$ )  $\delta$  -43.81 (s, 3 F);  $^{13}\text{C}$  NMR (100 MHz,  $\text{CDCl}_3$ ): 160.8, 134.2, 131.4, 128.1 (q,  $J = 310.5$  Hz), 120.5, 110.8, 97.9, 70.2 (q,  $J = 4.2$  Hz), 55.8 ppm. The characterization data were in accordance with reported ones.<sup>[3]</sup>

#### **(*p*-tolylethynyl)(trifluoromethyl)sulfane 2d**

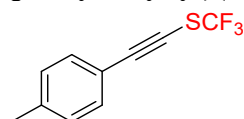

GP A. Colorless oil (99%, Eluent: petroleum ether); GP B. Colorless oil (62%, Eluent: petroleum ether).  $^1\text{H}$  NMR (400 MHz,  $\text{CDCl}_3$ )  $\delta$  7.39 (d,  $J = 8.4$  Hz, 2H), 7.15 (d,  $J = 8.0$  Hz, 2H), 2.37 (s, 3H);  $^{19}\text{F}$  NMR (376 MHz,  $\text{CDCl}_3$ )  $\delta$  -43.76 (s, 3F);  $^{13}\text{C}$  NMR (100 MHz,  $\text{CDCl}_3$ )  $\delta$  140.2, 132.3, 129.2, 128.1 (q,  $J = 310.8$  Hz), 118.5, 101.5, 65.8 (q,  $J = 4.2$  Hz), 21.6 ppm. The characterization data were in accordance with reported ones.<sup>[4]</sup>

#### **((4-(*tert*-butyl)phenyl)ethynyl)(trifluoromethyl)sulfane 2e**

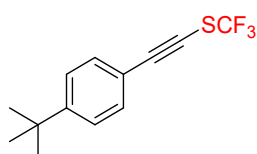

GP A. Colorless oil (99%, Eluent: petroleum ether); GP B. Colorless oil (58%, Eluent: petroleum ether).  $^1\text{H}$  NMR (400 MHz,  $\text{CDCl}_3$ )  $\delta$  7.46-7.43 (m, 2H), 7.38-7.36 (m, 2H), 1.31 (s, 9H);  $^{19}\text{F}$  NMR (376 MHz,  $\text{CDCl}_3$ )  $\delta$  -43.51 (s, 3F);  $^{13}\text{C}$  NMR (100 MHz,  $\text{CDCl}_3$ )  $\delta$  153.4, 132.2, 128.2 (q,  $J = 310.5$  Hz), 125.5, 118.5, 101.5, 65.8 (q,  $J = 4.2$  Hz), 34.9, 31.1 ppm. The characterization data were in accordance with reported ones.<sup>[4]</sup>

#### **N, N-dimethyl-4-((trifluoromethylthio)ethynyl)aniline 2f**

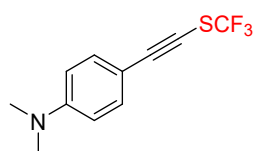

GP A. (TFTI 1.0 equiv., PFTB/DCE=2/3) white solid (80%, Eluent: petroleum ether/EtOAc = 100/3); GP B. (HFIP/DCE=1/2) white solid (68%, Eluent: petroleum ether/EtOAc = 100/3). A mixture of DCE and HFIP is used as the solvent, the solvent is DCE/HFIP = 2/1.  $^1\text{H}$  NMR (400 MHz,  $\text{CDCl}_3$ )  $\delta$  7.40 (d,  $J = 8.0$  Hz, 2H), 6.61 (d,  $J = 8.0$  Hz, 2H), 3.00 (s, 6H);  $^{19}\text{F}$  NMR (376 MHz,  $\text{CDCl}_3$ )  $\delta$  -44.66 (s, 3F);  $^{13}\text{C}$  NMR (100 MHz,  $\text{CDCl}_3$ )  $\delta$  151.1, 134.4, 128.2 (q,  $J = 310.6$  Hz), 111.4, 107.71, 103.2, 63.9 (q,  $J = 4.4$  Hz), 40.0 ppm. The characterization data were in accordance with reported

ones.<sup>[4]</sup>

### (Biphenyl-4-ylethynyl)(trifluoromethyl)sulfane 2g

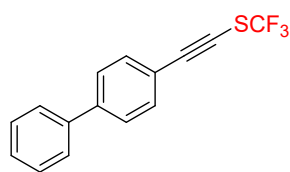

GP A (TFTI 2.0 equiv.) Yellow crystal (99%, Eluent: petroleum ether). <sup>1</sup>H NMR (400 MHz, CDCl<sub>3</sub>) δ 7.59-7.55 (m, 6H), 7.45 (t, *J* = 8.0 Hz, 2H), 7.39-7.35 (m, 1H); <sup>19</sup>F NMR (376 MHz, CDCl<sub>3</sub>) δ -43.60 (s, 3F); <sup>13</sup>C NMR (100 MHz, CDCl<sub>3</sub>) δ 142.5, 139.9, 132.7, 128.9, 128.1 (q, *J* = 311.0 Hz), 128.0, 127.1, 127.1, 120.3, 101.2, 67.3 (q, *J* = 4.0 Hz) ppm. The characterization data were in accordance with reported ones.<sup>[3]</sup>

### (Phenylethynyl)(trifluoromethyl)sulfane 2h

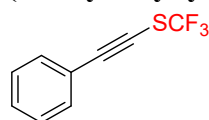

GP A. light yellow oil. (95%, Eluent: petroleum ether) <sup>1</sup>H NMR (400 MHz, CDCl<sub>3</sub>) δ 7.51-7.49 (m, 2H), 7.40-7.35 (m, 3H); <sup>19</sup>F NMR (376.1 MHz, CDCl<sub>3</sub>): δ -43.64 (s, 3F); <sup>13</sup>C NMR (100 MHz, CDCl<sub>3</sub>) δ 132.2, 129.8, 128.5, 128.1 (q, *J* = 310.4 Hz), 121.6, 101.3 (d, *J* = 1.5 Hz), 66.7 (q, *J* = 4.3 Hz) ppm. The characterization data were in accordance with reported ones.<sup>[4]</sup>

### ((3-Chlorophenyl)ethynyl)(trifluoromethyl)sulfane 2i

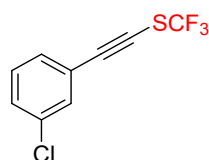

GP A (TFTI 2.0 equiv.) pale yellow oil (92%, Eluent: petroleum ether) <sup>1</sup>H NMR (400 MHz, CDCl<sub>3</sub>) δ 7.48 (s, 1H), 7.38-7.36 (m, 2H), 7.30-7.26 (m, 1H); <sup>19</sup>F NMR (376 MHz, CDCl<sub>3</sub>) δ -43.30 (s, 3F); <sup>13</sup>C NMR (100 MHz, CDCl<sub>3</sub>) δ 134.4, 131.9, 130.2, 130.0, 129.7, 128.0 (q, *J* = 310.8 Hz), 123.2, 99.8, 68.3 (q, *J* = 4.3 Hz) ppm. The characterization data were in accordance with reported ones.<sup>[5]</sup>

### ((3-Bromophenyl)ethynyl)(trifluoromethyl)sulfane 2j

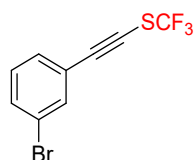

GP A (TFTI 2.3 equiv.) pale yellow oil (99%, Eluent: petroleum ether) <sup>1</sup>H NMR (400 MHz, CDCl<sub>3</sub>) δ 7.64 (s, 1H), 7.38-7.36 (m, 2H), 7.24-7.20 (m, 1H); <sup>19</sup>F NMR (376 MHz, CDCl<sub>3</sub>) δ -43.28 (s, 3F); <sup>13</sup>C NMR (100 MHz, CDCl<sub>3</sub>) δ 134.7, 131.8, 130.6, 129.9, 128.0 (q, *J* = 310.7 Hz), 123.4, 122.3, 99.6, 68.5 (q, *J* = 4.4 Hz) ppm.

#### 4-(((Trifluoromethyl)thio)ethynyl)benzonitrile 2k

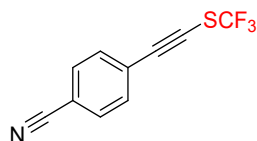

GP C.(80°C) Light yellow oil. (50%, Eluent: ethyl acetate/petroleum ether = 1/10)  $^1\text{H}$  NMR (400 MHz,  $\text{CDCl}_3$ )  $\delta$  7.65 (d,  $J = 6.0$  Hz, 2 H), 7.56 (d,  $J = 6.0$  Hz, 2 H);  $^{19}\text{F}$  NMR (376 MHz,  $\text{CDCl}_3$ )  $\delta$  -42.88 (s, 3 F);  $^{13}\text{C}$  NMR (100 MHz,  $\text{CDCl}_3$ )  $\delta$  132.2, 132.1, 127.8 (q,  $J = 311.0$  Hz), 126.2, 118.1, 112.8, 99.5, 72.0 (q,  $J = 4.2$  Hz) ppm. The characterization data were in accordance with reported ones. <sup>[6]</sup>

#### methyl 4-(2-(((trifluoromethyl)sulfanyl)ethynyl)benzoate 2l

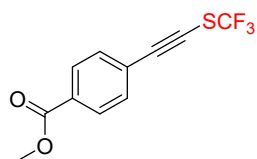

GP C. (60°C) Colorless oil. (85%, Eluent: petroleum ether)  $^1\text{H}$  NMR (400 MHz,  $\text{CDCl}_3$ )  $\delta$  8.02 (d,  $J = 8.0$  Hz, 2 H), 7.54 (d,  $J = 8.0$  Hz, 2 H), 3.92 (s, 3 H);  $^{19}\text{F}$  NMR (376 MHz,  $\text{CDCl}_3$ )  $\delta$  -43.21 (s, 3F);  $^{13}\text{C}$  NMR (100 MHz,  $\text{CDCl}_3$ )  $\delta$  166.2, 131.7, 130.7, 129.6, 127.9 (q,  $J = 310.7$  Hz), 126.0, 100.5, 70.2 (q,  $J = 4.2$  Hz), 52.3 ppm. The characterization data were in accordance with reported ones. <sup>[7]</sup>

#### 1-methoxy-4-(2-(((trifluoromethyl)sulfanyl)ethynyl)benzene 2m

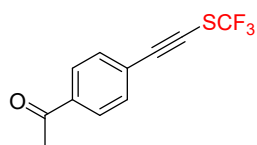

GP C. Colorless oil. (65%, Eluent: petroleum ether)  $^1\text{H}$  NMR (400 MHz,  $\text{CDCl}_3$ )  $\delta$  7.93 (d,  $J = 8.0$  Hz, 2 H), 7.55 (d,  $J = 8.0$  Hz, 2 H), 2.60 (s, 3 H);  $^{19}\text{F}$  NMR (376 MHz,  $\text{CDCl}_3$ )  $\delta$  -43.16 (s, 3F);  $^{13}\text{C}$  NMR (100 MHz,  $\text{CDCl}_3$ )  $\delta$  197.1, 137.1, 131.8, 128.3, 127.9 (q,  $J = 311.0$  Hz), 126.1, 100.4, 70.4 (q,  $J = 4.5$  Hz), 26.6 ppm. The characterization data were in accordance with reported ones. <sup>[7]</sup>

#### ((4-Nitrophenyl)ethynyl)(trifluoromethyl)sulfane 2n

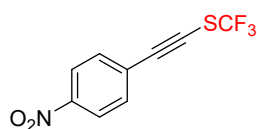

GP C. Light yellow liquid (55%, Eluent: ethyl acetate/petroleum ether = 1/ 10)  $^1\text{H}$  NMR (400 MHz,  $\text{CDCl}_3$ )  $\delta$  8.23 (d,  $J = 8.0$  Hz, 2 H), 7.63 (d,  $J = 8.0$  Hz, 2 H);  $^{19}\text{F}$  NMR (376 MHz,  $\text{CDCl}_3$ )  $\delta$  -42.75 (s, 3 F);  $^{13}\text{C}$  NMR (100 MHz,  $\text{CDCl}_3$ )  $\delta$  147.7, 132.3, 128.1, 127.7 (q,  $J = 311.0$  Hz), 123.7, 99.3, 73.0 (q,  $J = 4.2$  Hz) ppm. The characterization data were in accordance with reported ones. <sup>[6]</sup>



### (Naphthalen-1-ylethynyl)(trifluoromethyl)sulfane 2o

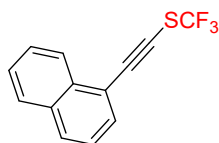

GP A (TFTI 2.0 equiv.) Colorless oil. (99%, Eluent: petroleum ether)  $^1\text{H}$  NMR (400 MHz,  $\text{CDCl}_3$ )  $\delta$  8.24 (d,  $J = 8.4$  Hz, 1H), 7.86 (t,  $J = 8.0$  Hz, 2H), 7.73 (d,  $J = 7.6$  Hz, 1H), 7.60-7.53 (m, 2H), 7.45-7.41 (m, 1H);  $^{19}\text{F}$  NMR (376 MHz,  $\text{CDCl}_3$ )  $\delta$  -43.54 (s, 3F);  $^{13}\text{C}$  NMR (100 MHz,  $\text{CDCl}_3$ )  $\delta$  133.4, 133.1, 131.6, 130.3, 128.4, 128.2 (q,  $J = 310.2$  Hz), 127.4, 126.7, 125.7, 125.1, 119.1, 99.6, 71.2 (q,  $J = 4.4$  Hz) ppm. The characterization data were in accordance with reported ones. <sup>[4]</sup>

### 3-((Trifluoromethylthio)ethynyl)thiophene 2p

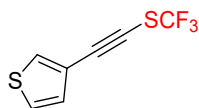

GP A (TFTI 1.5 equiv.) Yellow oil. (99%, Eluent: petroleum ether)  $^1\text{H}$  NMR (400 MHz,  $\text{CDCl}_3$ )  $\delta$  7.65-7.63 (m, 1H), 7.32-7.29 (m, 1H), 7.20-7.16 (m, 1H);  $^{19}\text{F}$  NMR (376.1 MHz,  $\text{CDCl}_3$ )  $\delta$  -43.73 (s, 3F);  $^{13}\text{C}$  NMR (100 MHz,  $\text{CDCl}_3$ )  $\delta$  132.1, 130.1, 128.0 (q,  $J = 311.0$  Hz), 125.7, 120.7, 96.4, 66.5 (q,  $J = 4.1$  Hz) ppm. The characterization data were in accordance with reported ones. <sup>[6]</sup>

### (Trifluoromethylthio)ethynylferrocene 2q

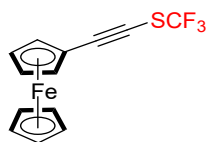

GP A (TFTI 1.5 equiv.) Red solid. (99%, Eluent: petroleum ether)  $^1\text{H}$  NMR (400 MHz,  $\text{CDCl}_3$ )  $\delta$  4.54 (s, 2H), 4.31 (s, 2H), 4.24 (s, 5H);  $^{19}\text{F}$  NMR (376 MHz,  $\text{CDCl}_3$ )  $\delta$  -44.68 (s, 3F);  $^{13}\text{C}$  NMR (100 MHz,  $\text{CDCl}_3$ )  $\delta$  127.7 (q,  $J = 310.6$  Hz), 102.4, 72.7, 70.1, 69.9, 62.3 (q,  $J = 4.1$  Hz), 62.1 ppm. The characterization data were in accordance with reported ones. <sup>[8]</sup>

### 1,4-Bis-((trifluoromethylthio)ethynyl)benzene 2r

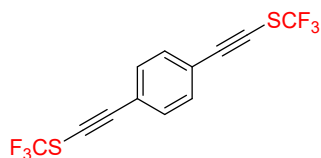

GP A (TFTI 2.5 equiv.) pale yellow solid. (99%, Eluent: petroleum ether)  $^1\text{H}$  NMR (400 MHz,  $\text{CDCl}_3$ )  $\delta$  7.46 (s, 4H);  $^{19}\text{F}$  NMR (376 MHz,  $\text{CDCl}_3$ )  $\delta$  -43.30 (s, 3F);  $^{13}\text{C}$  NMR (100 MHz,  $\text{CDCl}_3$ )  $\delta$  132.6, 127.9 (q,  $J = 310.7$  Hz), 122.6, 100.4, 69.6 (q,  $J = 4.5$  Hz) ppm. The characterization data were in accordance with reported ones. <sup>[8]</sup>

### (cyclohex-1-en-1-ylethynyl)(trifluoromethyl)sulfane 2s

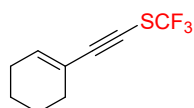

GP A (TFTI 1.0 equiv.) Colorless oil. (90%, Eluent: petroleum ether)<sup>1</sup>H NMR (400 MHz, CDCl<sub>3</sub>) δ 6.28 (m, 1H), 2.14 (m, 4H), 1.65-1.58 (m, 4H); <sup>19</sup>F NMR (376 MHz, CDCl<sub>3</sub>) δ -44.31 (s, 3F); <sup>13</sup>C NMR (100 MHz, CDCl<sub>3</sub>) δ 139.7, 128.2 (q, *J* = 310.2 Hz), 120.0, 103.2, 63.44 (q, *J* = 4.3 Hz), 28.5, 25.8, 22.0, 21.2 ppm. The characterization data were in accordance with reported ones.<sup>[8]</sup>

### (4-phenylbut-1-yn-1-yl)(trifluoromethyl)sulfane 2t

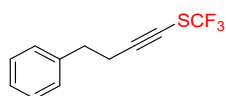

GP B. Colorless oil (81%, Eluent: petroleum ether.) <sup>1</sup>H NMR (400 MHz, CDCl<sub>3</sub>) δ 7.32-7.28 (m, 2H), 7.23-7.20 (m, 3H), 2.87 (t, *J* = 7.2 Hz, 2H), 2.67 (t, *J* = 7.2 Hz, 2H); <sup>19</sup>F NMR (376 MHz, CDCl<sub>3</sub>) δ -43.75 (s, 3F); <sup>13</sup>C NMR (100 MHz, CDCl<sub>3</sub>) δ 139.8, 128.5, 128.4 (q, *J* = 309.7 Hz), 128.4, 126.5, 102.9, 57.9 (q, *J* = 4.3 Hz), 34.4, 22.4 ppm. The characterization data were in accordance with reported ones.<sup>[2]</sup>

### *tert*-butyldimethyl((6-((trifluoromethyl)thio)hex-5-yn-1-yl)oxy)silane 2u

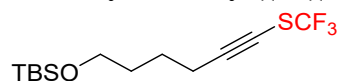

GP A. Colorless oil (99%, Eluent: petroleum ether/EtOAc = 4/1); GPB. (TFTI 2.5 equiv.) Colorless oil (75%, Eluent: petroleum ether/EtOAc = 4/1). <sup>1</sup>H NMR (400 MHz, CDCl<sub>3</sub>) δ 3.64 (t, *J* = 6.0 Hz, 2H), 2.42 (t, *J* = 6.4 Hz, 2H), 1.62 (t, *J* = 3.6 Hz, 4H), 0.89 (s, 9H), 0.05 (s, 6H); <sup>19</sup>F NMR (376 MHz, CDCl<sub>3</sub>) δ -44.32 (s, 3F); <sup>13</sup>C NMR (100 MHz, CDCl<sub>3</sub>) δ 128.5 (q, *J* = 309.5 Hz), 103.8, 62.4, 57.0 (q, *J* = 4.3 Hz), 31.7, 25.9, 24.6, 19.9, 18.3, -5.4 ppm.

### (6-(benzyloxy)hex-1-yn-1-yl)(trifluoromethyl)sulfane 2v

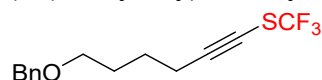

GP B. Colorless oil (82%, Eluent: petroleum ether/EtOAc = 100/1). <sup>1</sup>H NMR (400 MHz, CDCl<sub>3</sub>) δ 7.37-7.31 (m, 4H), 7.30-7.27 (m, 1H), 4.50 (s, 2H), 3.49 (t, *J* = 6.0 Hz, 2H), 2.41 (t, *J* = 6.4 Hz, 2H), 1.76-1.62 (m, 4H); <sup>19</sup>F NMR (376 MHz, CDCl<sub>3</sub>) δ -44.44 (s, 3F); <sup>13</sup>C NMR (100 MHz, CDCl<sub>3</sub>) δ 138.4, 128.5 (q, *J* = 309.4 Hz), 128.4, 127.6, 127.5, 103.6, 72.9, 69.5, 57.2 (q, *J* = 4.3 Hz), 28.7, 24.8, 19.4 ppm. HRMS (EI): *m/z* Calcd. for C<sub>14</sub>H<sub>15</sub>F<sub>3</sub>OS [M]<sup>+</sup>: 288.0790, Found: 288.0793. IR(KBr): 2940, 2865, 1721, 1274, 1155, 1108, 739 cm<sup>-1</sup>.

### 6-((trifluoromethyl)thio)hex-5-yn-1-yl benzoate 2w

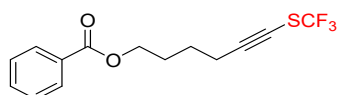

GP B. Colorless oil (80%, Eluent: DCM/petroleum ether = 1/4).  $^1\text{H}$  NMR (400 MHz,  $\text{CDCl}_3$ )  $\delta$  8.06-8.03 (m, 2H), 7.59-7.54 (m, 1H), 7.47-7.43 (m, 2H), 4.35 (t,  $J = 6.4$  Hz, 2H), 2.49 (t,  $J = 6.4$  Hz, 2H), 1.91-1.86 (m, 2H), 1.78-1.70 (m, 2H);  $^{19}\text{F}$  NMR (376 MHz,  $\text{CDCl}_3$ )  $\delta$  -44.41 (s, 3F);  $^{13}\text{C}$  NMR (100 MHz,  $\text{CDCl}_3$ )  $\delta$  166.6, 132.9, 130.2, 129.5, 128.4 (q,  $J = 309.4$  Hz), 128.3, 103.1, 64.2, 57.6 (q,  $J = 4.3$  Hz), 27.7, 24.7, 19.8 ppm. HRMS (ESI):  $m/z$  Calcd. for  $\text{C}_{14}\text{H}_{13}\text{F}_3\text{O}_2\text{S}$   $[\text{M}+\text{Na}]^+$ : 325.0481, Found: 325.0485. IR(KBr): 2957, 1720, 1640, 1274, 1154, 1108, 711  $\text{cm}^{-1}$ .

### 6-((trifluoromethyl)thio)hex-5-yn-1-ol 2x

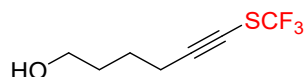

GP A Colorless oil (99%, Eluent: petroleum ether/EtOAc = 9/1). GP B Colorless oil (55%, Eluent: petroleum ether/EtOAc = 9/1).  $^1\text{H}$  NMR (400 MHz,  $\text{CDCl}_3$ )  $\delta$  3.67 (t,  $J = 5.6$  Hz, 2H), 2.44 (t,  $J = 6.0$  Hz, 2H), 1.72-1.63 (m, 4H);  $^{19}\text{F}$  NMR (376 MHz,  $\text{CDCl}_3$ )  $\delta$  -44.20 (s, 3F);  $^{13}\text{C}$  NMR (100 MHz,  $\text{CDCl}_3$ )  $\delta$  128.4 (q,  $J = 309.4$  Hz), 103.4, 62.2, 57.3 (q,  $J = 4.3$  Hz), 31.6, 24.4, 19.9 ppm. HRMS (EI):  $m/z$  Calcd. for  $\text{C}_7\text{H}_9\text{F}_3\text{OS}$   $[\text{M}]^+$ : 198.0321, Found: 198.0320. IR(KBr): 2949, 1721, 1276, 1156, 1108, 757, 713  $\text{cm}^{-1}$ .

### (6-iodohex-1-yn-1-yl)(trifluoromethyl)sulfane 2y

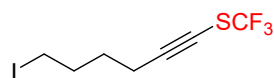

GP A (TFTI 1.5 equiv.) Colorless oil (99%, Eluent: petroleum ether). GP B (TFTI 2.5 equiv.) Colorless oil (63%, Eluent: petroleum ether).  $^1\text{H}$  NMR (400 MHz,  $\text{CDCl}_3$ )  $\delta$  3.21 (t,  $J = 6.8$  Hz, 2H), 2.44 (t,  $J = 6.8$  Hz, 2H), 1.97-1.90 (m 2H), 1.73-1.65 (m, 2H);  $^{19}\text{F}$  NMR (376 MHz,  $\text{CDCl}_3$ )  $\delta$  -44.32 (s, 3F);  $^{13}\text{C}$  NMR (100 MHz,  $\text{CDCl}_3$ )  $\delta$  128.4 (q,  $J = 309.7$  Hz), 102.8, 57.8 (q,  $J = 4.3$  Hz), 32.1, 28.7, 19.1, 5.6 ppm. The characterization data were in accordance with reported ones.<sup>[2]</sup>

### 2-(6-((trifluoromethyl)thio)hex-5-yn-1-yl)isoindoline-1,3-dione 2z

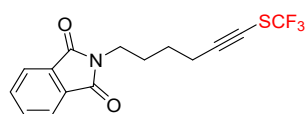

GP A. Colorless oil (99%, Eluent: petroleum ether/EtOAc = 20/1); GP B. (TFTI 2.5 equiv.) Colorless oil (72%, Eluent: petroleum ether/EtOAc = 20/1).  $^1\text{H}$  NMR (400 MHz,  $\text{CDCl}_3$ )  $\delta$  7.86-7.84 (m, 2H), 7.74-7.71 (m, 2H), 3.72 (t,  $J = 7.2$  Hz, 2H), 2.46 (t,  $J = 7.2$  Hz, 2H), 1.84-1.77 (m, 2H), 1.65-1.58 (m, 2H);  $^{19}\text{F}$  NMR (376 MHz,  $\text{CDCl}_3$ )  $\delta$  -43.92 (s, 3F);  $^{13}\text{C}$  NMR (100 MHz,  $\text{CDCl}_3$ )  $\delta$  168.4, 133.9, 132.6, 128.4 (q,  $J = 309.4$  Hz), 123.2, 102.9, 57.6 (q,  $J = 4.3$  Hz), 37.2, 27.6, 25.2, 19.7 ppm. HRMS (ESI):  $m/z$  Calcd. for  $\text{C}_{15}\text{H}_{12}\text{F}_3\text{NO}_2\text{S}$   $[\text{M}+\text{H}]^+$ : 328.0614, Found: 328.0617. IR(KBr): 2949, 1773, 1714, 1397, 1154, 1108, 717  $\text{cm}^{-1}$ .

### oct-1-yn-1-yl(trifluoromethyl)sulfane 2aa

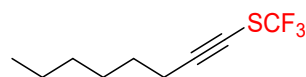

GP B. Colorless oil (94%, Eluent: petroleum ether).  $^1\text{H}$  NMR (400 MHz,  $\text{CDCl}_3$ )  $\delta$  2.38 (t,  $J = 7.2$  Hz, 2H), 1.56-1.54 (m, 2H), 1.42-1.34 (m, 2H), 1.33-1.26 (m, 4H), 0.89 (t,  $J = 6.8$  Hz, 3H);  $^{19}\text{F}$  NMR (376 MHz,  $\text{CDCl}_3$ )  $\delta$  -44.51 (s, 3F);  $^{13}\text{C}$  NMR (100 MHz,  $\text{CDCl}_3$ )  $\delta$  128.5 (q,  $J = 309.4$  Hz), 104.0, 56.8 (q,  $J = 4.1$  Hz), 31.2, 28.4, 27.9, 22.5, 20.2, 13.9 ppm.

**(3-cyclohexylprop-1-yn-1-yl)(trifluoromethyl)sulfane 2ab**

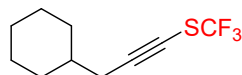

GP B. Colorless oil (85%, Eluent: petroleum ether).  $^1\text{H}$  NMR (400 MHz,  $\text{CDCl}_3$ )  $\delta$  2.27 (d,  $J = 6.8$  Hz, 2H), 1.79-1.71 (m, 4H), 1.66 (d,  $J = 12.4$  Hz, 1H), 1.58-1.48 (m, 1H), 1.28-1.12 (m, 4H), 1.05-0.99 (m, 1H);  $^{19}\text{F}$  NMR (376 MHz,  $\text{CDCl}_3$ )  $\delta$  -44.53 (s, 3F);  $^{13}\text{C}$  NMR (100 MHz,  $\text{CDCl}_3$ )  $\delta$  128.5 (q,  $J = 309.5$  Hz), 103.0, 57.5 (q,  $J = 4.2$  Hz), 37.0, 32.6, 27.9, 26.1, 26.0 ppm. The characterization data were in accordance with reported ones.<sup>[2]</sup>

**(2R,3R,4S,5R)-3,4,5-tris(benzyloxy)-2-((benzyloxy)methyl)-6-(((6-((trifluoromethyl)thio)hex-5-yn-1-yl)oxy)tetrahydro-2H-pyran 2ac**

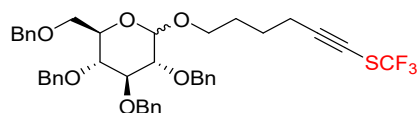

GP B. Colorless oil (83%, Eluent: petroleum ether/EtOAc = 9/1).  $^1\text{H}$  NMR (400 MHz,  $\text{CDCl}_3$ )  $\delta$  7.33-7.26 (m, 18H), 7.16-7.12 (m, 2H), 5.00-4.37 (m, 9H), 3.97 (t,  $J = 9.2$  Hz, 1H), 3.73-3.41 (m, 7H), 2.40 (t,  $J = 6.8$  Hz, 2H), 1.76-1.58 (m, 4H);  $^{19}\text{F}$  NMR (376 MHz,  $\text{CDCl}_3$ )  $\delta$  -44.49 (s, 3F);  $^{13}\text{C}$  NMR (100 MHz,  $\text{CDCl}_3$ )  $\delta$  138.8, 138.6, 138.4, 138.3, 138.2, 138.1, 138.0, 137.9, 128.4 (q,  $J = 309.4$  Hz), 128.4, 128.4, 128.3, 128.3, 127.9, 127.9, 127.9, 127.9, 127.9, 127.9, 127.9, 127.9, 127.8, 127.7, 127.7, 127.6, 127.6, 127.6, 127.5, 103.5, 96.9, 84.7, 82.2, 82.0, 80.1, 77.8, 77.7, 75.6, 75.6, 75.1, 74.9, 74.8, 73.4, 73.4, 73.2, 70.2, 69.0, 68.9, 68.5, 67.4, 57.3 (q,  $J = 4.3$  Hz), 28.7, 28.4, 24.8, 24.8, 19.9, 19.8 ppm. HRMS (ESI):  $m/z$  Calcd. for  $\text{C}_{41}\text{H}_{43}\text{F}_3\text{O}_6\text{S}$   $[\text{M}+\text{Na}]^+$ : 743.2625, Found: 743.2628. IR(KBr): 3649, 3522, 3296, 3191, 2940, 1730, 1459, 1160, 1109  $\text{cm}^{-1}$ .

**(3S,8R,9S,10S,13R,14S,17R)-17-((R)-heptan-2-yl)-10,13-dimethylhexadecahydro-1H-cyclopenta[a]phenanthren-3-yl 7-((trifluoromethyl)thio)hept-6-ynoate 2ad**

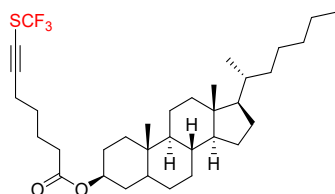

GP B. Colorless oil (87%, Eluent: petroleum ether/EtOAc = 50/1).  $^1\text{H}$  NMR (400 MHz,  $\text{CDCl}_3$ )  $\delta$  4.74-4.66 (m 1H), 2.41 (t,  $J = 6.8$  Hz, 2H), 2.29 (t,  $J = 7.2$  Hz, 2H), 1.98-1.94 (m, 1H), 1.83-1.43 (m, 14H), 1.40-0.94 (m, 20H), 0.91-0.85 (m, 10H), 0.82 (s, 3H), 0.65 (s, 3H);  $^{19}\text{F}$  NMR (376 MHz,  $\text{CDCl}_3$ )  $\delta$  -44.40 (s, 3F);  $^{13}\text{C}$  NMR (100 MHz,  $\text{CDCl}_3$ )  $\delta$  171.7, 127.4 (q,  $J = 309.6$  Hz), 102.2, 72.7, 56.4 (q,  $J = 3.8$  Hz), 55.4, 55.3,

53.2, 43.6, 41.6, 38.9, 38.5, 35.7, 35.2, 34.8, 34.5, 34.4, 33.0, 30.9, 27.6, 27.2, 26.9, 26.5, 26.4, 29.2, 23.1, 22.8, 21.8, 21.5, 20.2, 18.9, 17.6, 11.2, 11.0 ppm. HRMS (ESI):  $m/z$  Calcd. for  $C_{34}H_{53}F_3O_2S$   $[M+K]^+$ : 621.3350, Found: 621.3900. IR(KBr): 3612, 3562, 3464, 3410, 3296, 2948, 1732, 1160, 1110  $cm^{-1}$ .

## 5. Comparative results of reactivity of other trifluoromethylthio transfer reagents

**Table S2.** Comparative results of reactivity of other trifluoromethylthio transfer reagents<sup>a</sup>

|                               | Shen | Shen | Rueping | Billard I | Billard II | TFTI |
|-------------------------------|------|------|---------|-----------|------------|------|
| Yield of <b>2z</b>            | 0%   | 0%   | 0%      | 0%        | 0%         | 72%  |
| Recovery of starting material | 100% | 100% | 100%    | 100%      | 100%       | 0%   |
| Recovery of the reagent       | 100% | 0%   | 100%    | 90%       | 100%       | 0%   |

  

|                               | Shen            | Shen            | Rueping | Billard I | Billard II | TFTI |
|-------------------------------|-----------------|-----------------|---------|-----------|------------|------|
| Yield of <b>2a</b>            | 3%              | 0%              | 0%      | 0%        | 0%         | 71%  |
| Recovery of starting material | 0% <sup>b</sup> | 0% <sup>b</sup> | 100%    | 80%       | 100%       | 0%   |
| Recovery of the reagent       | 85%             | 0%              | 100%    | 98%       | 100%       | 0%   |

<sup>a</sup>Reaction condition A: alkyne (0.2 mmol),  $CF_3S$ -transfer reagent, HFIP (2.0 mL), rt, 12 h. Isolated yields are reported. <sup>b</sup>The reaction time is 5 hours.

## 6. Recovery of PFTB and *N*-acetyl-2-iodobenzamide

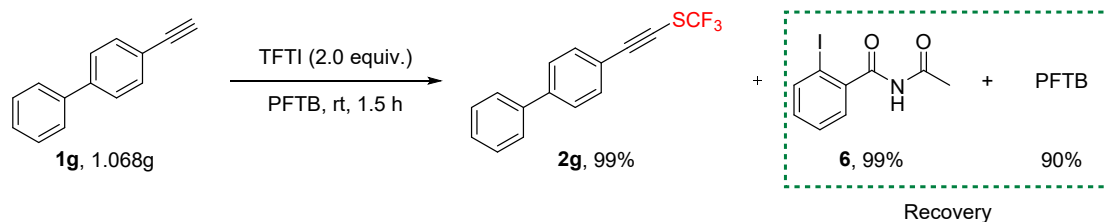

To a stirred solution of 4-ethynyl-1,1'-biphenyl **1g** (1.068 g, 6 mmol) and TFTI (4.668 g, 12 mmol) in PFTB (50.0 mL) at room temperature. After completion of the reaction (monitored by TLC) the solvent was recovered by distillation at atmospheric pressure (45.0 mL, 90%). The residue was purified by column chromatography on silica gel to give **2g** (1.658 g, 99%) as yellow crystal and **6** (3.449 g, 99%) as colorless solid. The recovered solvent was identified to NMR.

<sup>1</sup>H NMR (400 MHz, CDCl<sub>3</sub>) δ 3.52 (d, 1H); <sup>19</sup>F NMR (376 MHz, CDCl<sub>3</sub>) δ -74.42 (s, 9F); <sup>13</sup>C NMR (100 MHz, CDCl<sub>3</sub>) δ 120.1 (q, *J* = 288.0 Hz), 76.8 ppm. The characterization data were in accordance with reported ones.<sup>[9]</sup>

## 7. A KIE experiment

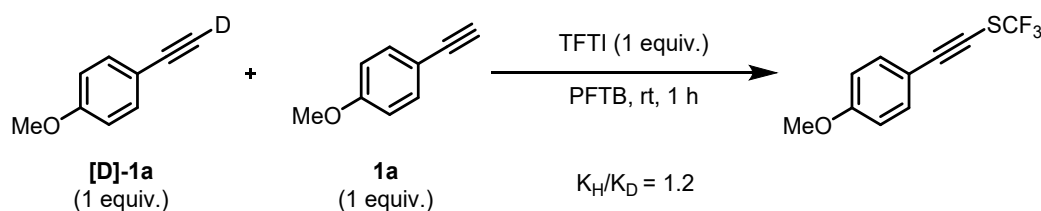

We carried out a competitive trifluoromethylthiolation reaction between **1a** and **[D]-1a** in the same pot. The general procedure for reaction monitoring by <sup>1</sup>H NMR was used, with the using 1,3,5-Trimethoxybenzene as an internal standard and using 0.09 equiv. of both **1a** and **[D]-1a**. The KIE value was obtained using the relative amount of unreacted starting materials recovered at the end of the reaction.

## 8. Transformations of Products

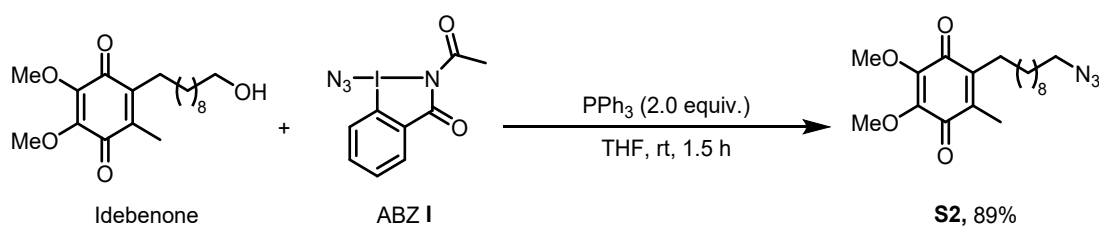

ABZ I (0.4 mmol, 2.0 equiv.) and PPh<sub>3</sub> (0.4 mmol, 2.0 equiv.) were placed into an oven-dried Schlenk flask equipped with a stirring bar under an argon atmosphere, and then 1.5 mL of freshly distilled THF and alcohol (0.2 mmol, 1.0 equiv.) were added in that order. The reaction mixture was stirred at room 50°C and monitored by thin-layer chromatography. When the reaction was complete, the solvent was evaporated under reduced pressure, and the residue was purified by flash column chromatography to give the azide product **S2**.

Red oil (64 mg, 89% yield, Eluent: EtOAc/petroleum ether = 1/9). <sup>1</sup>H NMR (400 MHz, CDCl<sub>3</sub>) δ 3.99 (s, 3H), 3.98 (s, 3H), 3.26 (t, *J* = 6.8 Hz, 2H), 2.45 (t, *J* = 6.8 Hz, 2H),

2.01 (s, 3H), 1.63-1.56 (m, 2H), 1.38-1.26 (m, 14H);  $^{13}\text{C}$  NMR (100 MHz,  $\text{CDCl}_3$ )  $\delta$  184.6, 184.0, 144.2, 144.2, 142.9, 138.6, 61.0, 51.4, 29.7, 29.3, 29.2, 29.2, 29.0, 28.7, 28.6, 26.6, 26.3, 11.8 ppm. The characterization data were in accordance with reported ones.<sup>[10]</sup>

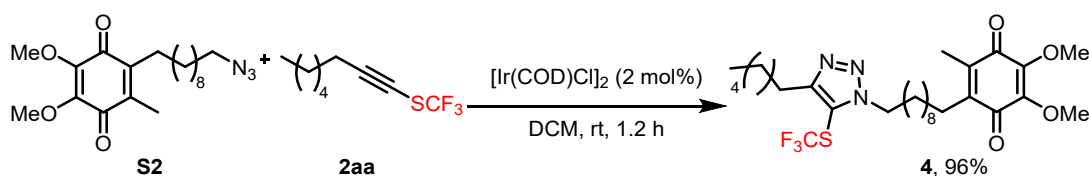

To an oven-dried 5-mL vial was added **2aa** (0.20 mmol), **S2** (0.30 mmol),  $[\text{Ir}(\text{COD})\text{Cl}]_2$  (2.7 mg, 4.0  $\mu\text{mol}$ ), and DCM (2.0 mL). The reaction mixture was stirred at room temperature for 1.2h. Subsequently, concentrated under reduced pressure. The residue was purified by silica gel flash column chromatography to give the desired product.<sup>[11]</sup> Red oil (96% yield, Eluent: EtOAc/petroleum ether = 4:1).  $^1\text{H}$  NMR (400 MHz,  $\text{CDCl}_3$ )  $\delta$  4.43 (d,  $J = 8.0$  Hz, 2H), 4.00 (s, 6H), 2.78 (d,  $J = 8.0$  Hz, 2H), 2.46 (m, 2H), 2.02 (s, 3H), 1.95 (m, 2H), 1.77-1.73 (m, 2H), 1.33-1.29 (m, 20H), 0.89 (s, 3H);  $^{19}\text{F}$  NMR (376 MHz,  $\text{CDCl}_3$ )  $\delta$  ppm -42.51 (s, 3F);  $^{13}\text{C}$  NMR (100 MHz,  $\text{CDCl}_3$ )  $\delta$  184.4, 183.9, 155.3, 144.1, 142.8, 138.4, 127.4 (q,  $J = 311.0$  Hz), 115.1, 60.9, 48.6, 31.3, 29.7, 29.5, 29.1, 28.8, 28.7, 28.6, 28.8, 26.7, 26.2, 26.1, 24.9, 22.3, 13.8, 11.6 ppm. HRMS (ESI):  $m/z$  Calcd. for  $\text{C}_{28}\text{H}_{42}\text{F}_3\text{N}_3\text{O}_4\text{S}$   $[\text{M}+\text{Na}]^+$ : 596.2749, Found: 596.2740.

#### Nuclear overhauser effect spectroscopy of **4**

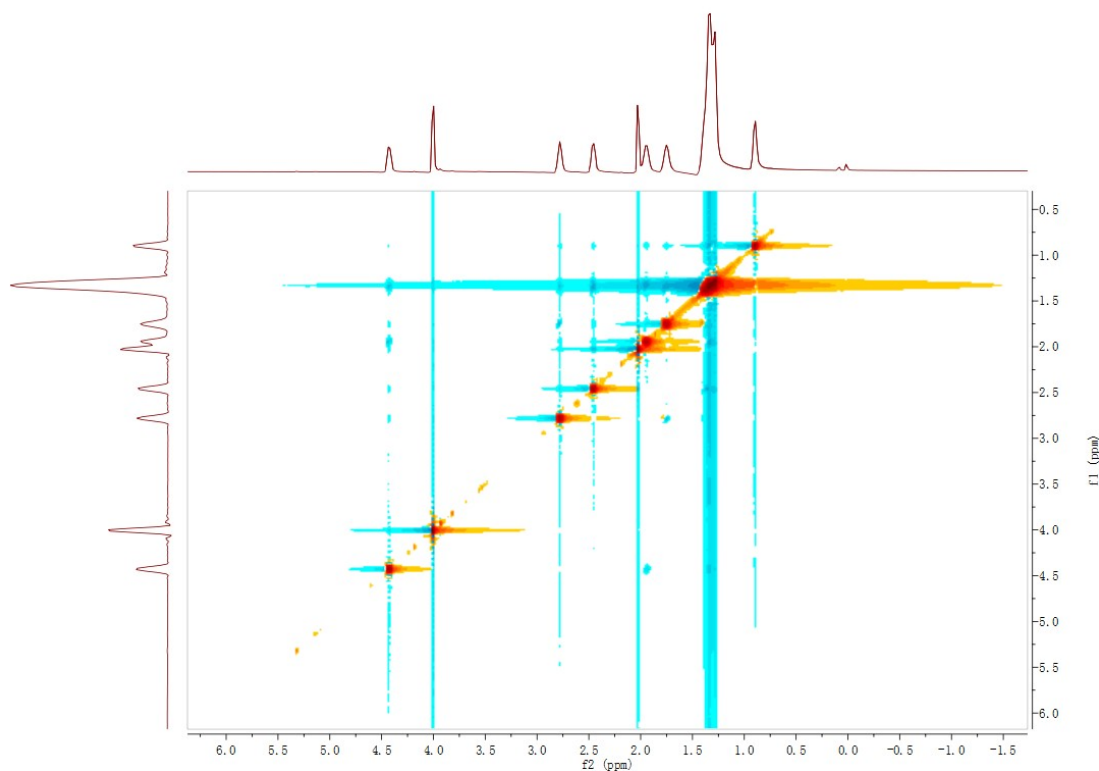

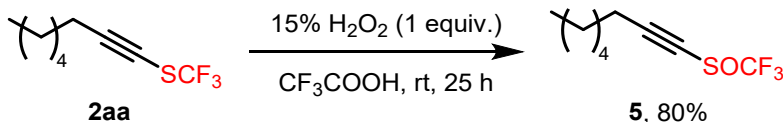

To the solution of **1f** (0.5 mmol, 1.0 equiv.) in  $\text{CF}_3\text{COOH}$  (2 mL) in a 10 mL tube equipped with a stir bar, 15 % aqueous solution of  $\text{H}_2\text{O}_2$  (0.5 mmol) was added dropwise very slowly. The reaction mixture was stirred at room temperature for 25 h. Subsequently, the mixture was poured into water (2 mL), and then neutralized with saturated aqueous solution of  $\text{NaHCO}_3$  to pH = 7. After extraction with ether (8 mL  $\times$  3), the organic phase was washed with water (8 mL) and then brine (8 mL), and dried over anhydrous  $\text{Na}_2\text{SO}_4$ . The solvent was evaporated in vacuo. The residue was purified by flash chromatography on silica gel using petroleum ether/ethyl acetate = 4:1 as the eluent to provide **5** as a colorless oil (80% yield).  $^1\text{H}$  NMR (400 MHz,  $\text{CDCl}_3$ )  $\delta$  2.52 (t,  $J$  = 8.0 Hz, 2H), 1.66-1.60 (m, 2H), 1.43-1.40 (m, 2H), 1.33-1.28 (m, 4H), 0.90 (t,  $J$  = 8.0 Hz, 3H);  $^{19}\text{F}$  NMR (376 MHz,  $\text{CDCl}_3$ )  $\delta$  -73.63 (s, 3F);  $^{13}\text{C}$  NMR (100 MHz,  $\text{CDCl}_3$ )  $\delta$  124.2 (q,  $J$  = 334.0 Hz), 110.8, 71.8, 31.0, 28.3, 27.1, 22.4, 19.8, 13.9 ppm. HRMS (ESI) calcd. for  $\text{C}_9\text{H}_{13}\text{F}_3\text{OS}$  ( $\text{M}+\text{H}$ ) $^+$  : 227.0712, Found: 227.0715.

## 9. Details of DFT calculations for the mechanism

Quantum chemical calculations were performed using the Gaussian 16 suite of programs.<sup>[12]</sup> The B3LYP-D3(BJ) functional, i.e., the B3LYP functional<sup>[13]</sup> including the D3 dispersion correction with the Becke-Johnson damping function<sup>[14]</sup>, was used for geometry optimizations and frequencies calculations, and a mixed basis set of SDD<sup>[15]</sup> for I and 6-31G(d,p)<sup>[16]</sup> for other atoms in conjunction with the SMD<sup>[17]</sup> implicit solvation model to account for the solvation effects of the hexafluoroisopropanol (HFIP) on the computed Gibbs energy profile. Since HFIP solvent is not available in the list of default/prefined solvents in Gaussian 16 software, it is herein parametrised using a set of seven parameters raised by R. S. Paton.<sup>[18]</sup> These parameters include the static dielectric constant of the solvent at 25°C ( $\text{Eps} = 16.7$ );<sup>[19]</sup> dynamic (optical) dielectric constant – using the square of the refractive index value of 1.275 at 20 °C<sup>[20]</sup> ( $\text{EpsInf} = 1.625625$ ); hydrogen bond acidity ( $\text{HbondAcidity} = 1.96$ ) and basicity ( $\text{HbondBasicity} = 0.00$ ),<sup>[19(a)]</sup> which are Abraham’s A and B values respectively; the surface tension of the solvent at interface ( $\text{SurfaceTensionAtInterface} = 23.23$ );<sup>[21]</sup> carbon aromaticity - the fraction of aromatic carbons ( $\text{CarbonAromaticity} = 0.00$ ) and



electronegative halogenicity – the fraction of halogens (Electronegative Halogenicity = 0.60). These parameters were specified using the keyword "SCRF=(SMD,Solvent=Generic,Read)" in Gaussian 16. The recently corrected radius for iodine was used for SMD calculations.<sup>[22]</sup> Optimized geometries were verified by frequency computations as minima (zero imaginary frequencies) or transition structures (a single imaginary frequency) at the same level of theory. Intrinsic reaction coordinate (IRC) calculations were used to confirm the connectivity between transition structure and intermediate.<sup>[23]</sup>

More accurate electronic energies were obtained by single point energy calculations at the SMD-M062X/6-311++G(2df,2p)+def2-TZVP(I)<sup>[24]</sup> level of theory. A factor of  $RT\ln(24.46)$  was added to free energy for each species to account for the 1 atm to 1 M standard state change. All Gibbs energies in solution reported throughout the text are in kilocalories per mole, and the bond lengths are in angstroms. The structures were generated by CYLview<sup>[25]</sup>. Multiwfn was utilized to perform the Hirshfeld charges calculation and analyze noncovalent interactions with an independent gradient model based on Hirshfeld partition (IGMH).<sup>[26]</sup>

### 9.1 Energy comparison and non-covalent interaction analysis of TS2 and TS2'

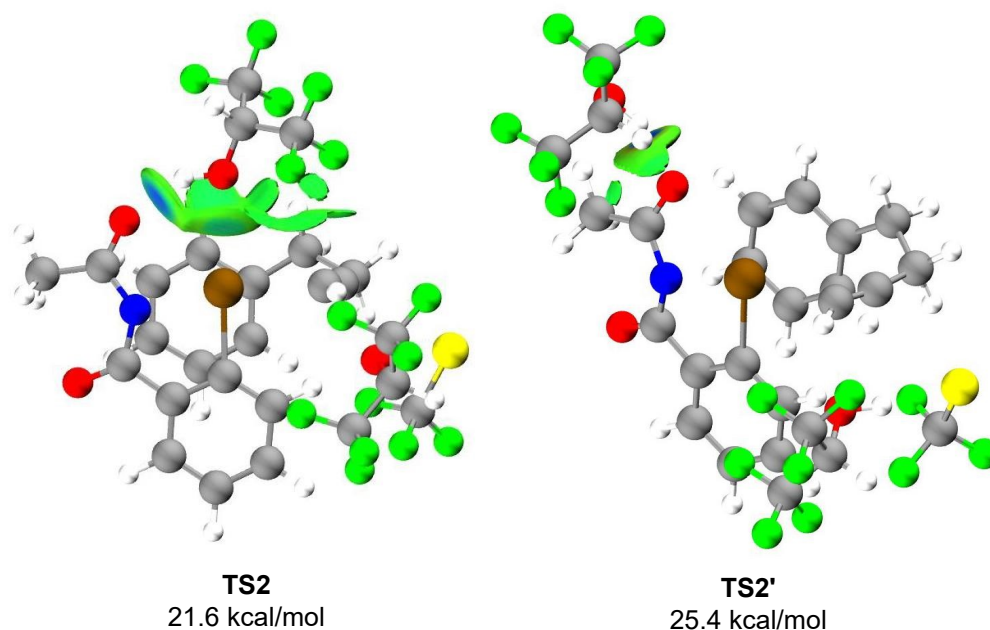

**Figure S1.**  $Sign(\lambda_2)\rho$  colored isosurfaces of  $\delta g^{inter}=0.005$  a.u. corresponding to independent gradient model based on Hirshfeld partition (IGMH) analysis for the rate-limiting step TS2 and TS2'.

**SMD-B3LYP-D3(BJ)/6-31G(d,p)+SDD(I) Calculated Cartesian Coordinates and Single Point Energies Calculated Using the SMD-M062X/6-311++G(2df,2p)+def2-TZVP(I)// SMD-B3LYP-D3(BJ)/6-31G(d,p)+SDD(I).**

**TFTI**

|                                          |             |             |                             |
|------------------------------------------|-------------|-------------|-----------------------------|
| C                                        | -0.33429900 | 3.60523800  | -0.29776400                 |
| C                                        | 0.96680800  | 3.97370600  | 0.05028100                  |
| C                                        | 1.94233600  | 3.00011400  | 0.24254500                  |
| C                                        | 1.62078100  | 1.64728400  | 0.08888100                  |
| C                                        | 0.31082400  | 1.32688000  | -0.25535300                 |
| C                                        | -0.68420700 | 2.25819400  | -0.45741300                 |
| H                                        | -1.09589500 | 4.36384200  | -0.44965800                 |
| H                                        | 1.21806500  | 5.02262500  | 0.17008900                  |
| H                                        | 2.96352100  | 3.25374000  | 0.51173400                  |
| H                                        | -1.69251500 | 1.97172700  | -0.72932600                 |
| I                                        | -0.03624300 | -0.82569500 | -0.45090500                 |
| C                                        | 2.65129700  | 0.59735000  | 0.28799400                  |
| O                                        | 3.81582200  | 0.85215200  | 0.59274400                  |
| N                                        | 2.13785200  | -0.65880700 | 0.08738100                  |
| C                                        | 2.75155300  | -1.88938500 | 0.18122900                  |
| C                                        | 4.20571600  | -1.96934100 | 0.54564800                  |
| H                                        | 4.80918100  | -1.42824100 | -0.18953600                 |
| H                                        | 4.38029200  | -1.49347800 | 1.51522900                  |
| H                                        | 4.49142400  | -3.02205000 | 0.57604500                  |
| O                                        | 2.06329500  | -2.88890700 | -0.04379900                 |
| S                                        | -2.65016200 | -0.49051200 | -1.08705400                 |
| C                                        | -3.28215400 | -0.37663900 | 0.60486000                  |
| F                                        | -2.72788600 | 0.64138700  | 1.30489300                  |
| F                                        | -4.61213700 | -0.16772300 | 0.58079700                  |
| F                                        | -3.06446700 | -1.49509500 | 1.32959500                  |
| Zero-point correction=                   |             |             | 0.158364 (Hartree/Particle) |
| Thermal correction to Energy=            |             |             | 0.176161                    |
| Thermal correction to Enthalpy=          |             |             | 0.177105                    |
| Thermal correction to Gibbs Free Energy= |             |             | 0.109634                    |

SCF Done: E(RM062X) = -1585.75094508

**(HFIP)<sub>2</sub>**

|   |             |             |             |
|---|-------------|-------------|-------------|
| C | 2.90937100  | 1.19209300  | 0.11511200  |
| C | 2.46306700  | -0.13785400 | 0.72953100  |
| O | 1.38959900  | 0.05397700  | 1.61240500  |
| H | 0.62347500  | 0.44012700  | 1.13403600  |
| F | 3.99169900  | 1.04445700  | -0.67265500 |
| F | 1.93474200  | 1.75852300  | -0.63199000 |
| F | 3.22002900  | 2.06109100  | 1.09341300  |
| C | 2.14683000  | -1.20867500 | -0.32172300 |
| F | 1.16650000  | -0.82923500 | -1.17417800 |
| F | 3.23156900  | -1.50380600 | -1.06500100 |
| F | 1.73982500  | -2.33607300 | 0.28530600  |
| H | 3.30994700  | -0.51706900 | 1.30907200  |
| C | -1.93032900 | -1.17837200 | 0.30778800  |
| C | -1.99871100 | 0.33617900  | 0.53629500  |
| O | -0.78434400 | 0.95256800  | 0.17601400  |
| H | -0.64153000 | 0.87718300  | -0.78207700 |
| F | -3.07295200 | -1.78395300 | 0.67766900  |
| F | -1.69883400 | -1.47884300 | -0.98604700 |
| F | -0.92686900 | -1.70148400 | 1.03512300  |
| C | -3.15755700 | 1.01531400  | -0.19805400 |
| F | -3.03946000 | 0.86995500  | -1.53534900 |
| F | -4.34863100 | 0.51576900  | 0.17156100  |
| F | -3.15156500 | 2.33215400  | 0.07003500  |
| H | -2.14443300 | 0.49828600  | 1.60692700  |

Zero-point correction= 0.128517 (Hartree/Particle)

Thermal correction to Energy= 0.147883

Thermal correction to Enthalpy= 0.148827

Thermal correction to Gibbs Free Energy= 0.078335

SCF Done: E(RM062X) = -1579.71329273

**TFTI-2HFIP**

|   |            |             |             |
|---|------------|-------------|-------------|
| C | 6.07154500 | -1.98904000 | -0.35937700 |
|---|------------|-------------|-------------|

|   |             |             |             |
|---|-------------|-------------|-------------|
| C | 5.83585200  | -3.32947600 | -0.04814400 |
| C | 4.53448800  | -3.78283800 | 0.14131100  |
| C | 3.45980300  | -2.89545800 | 0.01969200  |
| C | 3.73645300  | -1.56694200 | -0.29365200 |
| C | 5.01302500  | -1.08107400 | -0.48688100 |
| H | 7.08617800  | -1.63186000 | -0.50626000 |
| H | 6.66886000  | -4.01848400 | 0.04681500  |
| H | 4.31682500  | -4.81840000 | 0.38551800  |
| H | 5.20118400  | -0.04238100 | -0.72705800 |
| I | 1.96137900  | -0.30480700 | -0.43321600 |
| C | 2.07155000  | -3.36715400 | 0.23411700  |
| O | 1.79307700  | -4.52851000 | 0.52243000  |
| N | 1.15521400  | -2.35229800 | 0.06618400  |
| C | -0.19467000 | -2.36476400 | 0.29797800  |
| C | -0.85454200 | -3.59651700 | 0.84569100  |
| H | -0.82008700 | -4.39448500 | 0.09729700  |
| H | -0.30874400 | -3.95813100 | 1.72094500  |
| H | -1.88694200 | -3.36384800 | 1.10443300  |
| O | -0.81298800 | -1.31655600 | 0.05450100  |
| S | 3.45113100  | 1.90876500  | -0.97247200 |
| C | 3.70915400  | 2.37933900  | 0.75712700  |
| F | 4.35414400  | 1.42709900  | 1.46598100  |
| F | 4.44795500  | 3.50087300  | 0.81982200  |
| C | -4.36922800 | -2.39927700 | -0.67633000 |
| C | -4.11067500 | -0.99976000 | -0.11333600 |
| C | -5.37767000 | -0.30659600 | 0.37769300  |
| H | -3.70803200 | -0.39709700 | -0.93437400 |
| O | -3.25564200 | -1.07995900 | 0.99383400  |
| H | -2.32155400 | -1.13418500 | 0.66729700  |
| F | -5.96337100 | -0.99028200 | 1.38107300  |
| F | -5.07288300 | 0.91940700  | 0.84348900  |
| F | -6.28614300 | -0.16007200 | -0.60639200 |
| F | -4.80432300 | -3.25311900 | 0.26912100  |
| F | -3.21628100 | -2.90035400 | -1.17532600 |
| F | -5.27323200 | -2.39088400 | -1.67589900 |

|                                          |                |            |                             |
|------------------------------------------|----------------|------------|-----------------------------|
| F                                        | 2.55076900     | 2.62387400 | 1.41426000                  |
| C                                        | -1.19523800    | 4.13832000 | -0.58027200                 |
| C                                        | -0.59205500    | 2.96599500 | 0.19879100                  |
| C                                        | -1.64237500    | 1.94074600 | 0.62660900                  |
| H                                        | -0.12308700    | 3.37322500 | 1.10155100                  |
| O                                        | 0.30604100     | 2.26588500 | -0.62561200                 |
| H                                        | 1.08504300     | 2.81714600 | -0.80956000                 |
| F                                        | -2.09399900    | 1.25618300 | -0.44295700                 |
| F                                        | -1.10351600    | 1.06231800 | 1.49104200                  |
| F                                        | -2.69425800    | 2.52113500 | 1.22750200                  |
| F                                        | -1.90040500    | 3.72668400 | -1.64950100                 |
| F                                        | -0.19565400    | 4.92711800 | -1.02920000                 |
| F                                        | -2.00033100    | 4.89104500 | 0.18951600                  |
| Zero-point correction=                   |                |            | 0.286952 (Hartree/Particle) |
| Thermal correction to Energy=            |                |            | 0.326321                    |
| Thermal correction to Enthalpy=          |                |            | 0.327266                    |
| Thermal correction to Gibbs Free Energy= |                |            | 0.206734                    |
| SCF Done: E(RM062X) =                    | -3165.48891619 |            |                             |

**1t**

|   |             |             |             |
|---|-------------|-------------|-------------|
| C | 2.47712100  | 1.20647900  | -0.13192600 |
| C | 1.12440200  | 1.20422500  | 0.20997600  |
| C | 0.43120400  | 0.00000800  | 0.38704300  |
| C | 1.12440500  | -1.20421600 | 0.21003700  |
| C | 2.47712400  | -1.20648400 | -0.13186400 |
| C | 3.15795000  | -0.00000600 | -0.30450500 |
| H | 3.00012200  | 2.15030200  | -0.26070700 |
| H | 0.59956700  | 2.14695400  | 0.34549100  |
| H | 0.59957200  | -2.14693900 | 0.34560000  |
| H | 3.00012700  | -2.15031200 | -0.26059700 |
| H | 4.21194600  | -0.00001200 | -0.56794700 |
| C | -1.04323600 | 0.00001500  | 0.70646800  |
| H | -1.30313200 | -0.88195700 | 1.30094300  |
| H | -1.30313200 | 0.88201300  | 1.30090500  |
| C | -1.89757400 | -0.00001300 | -0.58424700 |

|                                          |                |             |                             |
|------------------------------------------|----------------|-------------|-----------------------------|
| H                                        | -1.64054400    | 0.87871000  | -1.18903600                 |
| H                                        | -1.64054400    | -0.87876300 | -1.18899800                 |
| C                                        | -3.33157900    | -0.00000700 | -0.30711700                 |
| C                                        | -4.51380900    | -0.00000100 | -0.05250300                 |
| H                                        | -5.56004100    | 0.00000300  | 0.16617300                  |
| Zero-point correction=                   |                |             | 0.166626 (Hartree/Particle) |
| Thermal correction to Energy=            |                |             | 0.175799                    |
| Thermal correction to Enthalpy=          |                |             | 0.176743                    |
| Thermal correction to Gibbs Free Energy= |                |             | 0.131395                    |
| SCF Done: E(RM062X) =                    | -386.972517635 |             |                             |

### TS1

|   |             |             |             |
|---|-------------|-------------|-------------|
| C | -5.67884200 | -1.99122900 | 0.73303700  |
| C | -5.98200800 | -1.30959900 | 1.91422000  |
| C | -5.02066000 | -0.51282000 | 2.52856000  |
| C | -3.75697000 | -0.38502300 | 1.94464000  |
| C | -3.50596800 | -1.04163200 | 0.74042200  |
| C | -4.42244800 | -1.86776600 | 0.12351200  |
| H | -6.42271600 | -2.63037000 | 0.26733500  |
| H | -6.96442500 | -1.41548800 | 2.36245100  |
| H | -5.21209500 | 0.00637300  | 3.46358400  |
| H | -4.20552100 | -2.38879800 | -0.79959000 |
| I | -1.49225800 | -0.62969900 | -0.03053200 |
| C | -2.68239900 | 0.37316900  | 2.61066600  |
| O | -2.80575200 | 1.05042100  | 3.62089000  |
| N | -1.45915800 | 0.20314700  | 1.96321500  |
| C | -0.22168800 | 0.78122500  | 2.18925500  |
| C | 0.03763500  | 1.45729900  | 3.50070600  |
| H | -0.54796000 | 2.38044500  | 3.55432500  |
| H | -0.28047500 | 0.81982800  | 4.32938300  |
| H | 1.10321700  | 1.67780400  | 3.56052700  |
| O | 0.61269800  | 0.67820400  | 1.29520200  |
| C | -2.50757400 | 2.99996100  | 0.73488200  |
| C | -3.55254500 | 2.61556200  | -0.10584800 |
| C | -3.34127800 | 2.44720700  | -1.48217700 |

|   |             |             |             |
|---|-------------|-------------|-------------|
| C | -2.05135300 | 2.63899300  | -1.98929500 |
| C | -1.00113800 | 3.02131300  | -1.15167200 |
| C | -1.22820100 | 3.21092800  | 0.21267800  |
| H | -2.69709900 | 3.14526500  | 1.79527200  |
| H | -4.54794000 | 2.46889700  | 0.30653900  |
| H | -1.87054600 | 2.50234200  | -3.05235900 |
| H | -0.01387300 | 3.18474600  | -1.57026700 |
| H | -0.42085600 | 3.52705500  | 0.86354300  |
| C | -4.48442600 | 2.06811300  | -2.39193700 |
| H | -5.35752200 | 2.69203500  | -2.17094400 |
| H | -4.20915500 | 2.25295300  | -3.43465000 |
| C | -4.92653200 | 0.59603900  | -2.24177200 |
| H | -5.24240500 | 0.40501700  | -1.20891200 |
| H | -5.80722100 | 0.41559100  | -2.87134300 |
| C | -3.89508900 | -0.36759900 | -2.60575200 |
| C | -3.05175700 | -1.19134200 | -2.89058400 |
| H | -2.34993400 | -1.92984400 | -3.20829200 |
| S | 0.40056200  | -1.43767600 | -2.44585300 |
| C | 0.19107300  | -3.17814300 | -2.13344100 |
| F | 0.36934200  | -3.52914300 | -0.82006800 |
| F | -1.06249600 | -3.63303400 | -2.44563800 |
| F | 1.04857700  | -3.95917100 | -2.83367400 |
| C | 2.58562300  | 3.56104200  | 0.41803100  |
| C | 2.61343900  | 2.22343800  | -0.31070100 |
| C | 3.15632900  | 2.32504000  | -1.73635200 |
| H | 1.58186600  | 1.86579500  | -0.38322800 |
| O | 3.43343300  | 1.37216900  | 0.44405300  |
| H | 3.13113200  | 0.45530900  | 0.26305100  |
| F | 4.41111800  | 2.80960000  | -1.77533800 |
| F | 3.17749400  | 1.09347500  | -2.28901400 |
| F | 2.38737700  | 3.11132600  | -2.52230000 |
| F | 3.82222700  | 4.05218200  | 0.61793400  |
| F | 2.00823900  | 3.41686600  | 1.63002800  |
| F | 1.87808800  | 4.48800200  | -0.26172700 |
| C | 4.47962800  | -2.20795300 | 0.39721300  |

|                                          |                |             |                             |
|------------------------------------------|----------------|-------------|-----------------------------|
| C                                        | 2.95045100     | -2.20473500 | 0.45337500                  |
| C                                        | 2.40214400     | -2.18883000 | 1.88376100                  |
| H                                        | 2.59778700     | -3.11943900 | -0.02992000                 |
| O                                        | 2.50737500     | -1.04812000 | -0.19659200                 |
| H                                        | 1.91938800     | -1.24412900 | -0.97273500                 |
| F                                        | 2.73335700     | -1.05765700 | 2.53606800                  |
| F                                        | 1.05429000     | -2.26028800 | 1.85746900                  |
| F                                        | 2.85232300     | -3.23210400 | 2.60499500                  |
| F                                        | 5.00038700     | -1.10266100 | 0.97130400                  |
| F                                        | 4.87869500     | -2.22399900 | -0.88708400                 |
| F                                        | 5.00725300     | -3.28160500 | 1.01310600                  |
| Zero-point correction=                   |                |             | 0.453683 (Hartree/Particle) |
| Thermal correction to Energy=            |                |             | 0.502941                    |
| Thermal correction to Enthalpy=          |                |             | 0.503885                    |
| Thermal correction to Gibbs Free Energy= |                |             | 0.364225                    |
| SCF Done: E(RM062X) =                    | -3552.46048197 |             |                             |

## IM1

|   |             |             |             |
|---|-------------|-------------|-------------|
| C | -6.09296400 | -1.40951400 | 1.18640900  |
| C | -6.11506300 | -0.75419100 | 2.42026900  |
| C | -4.96076000 | -0.15356000 | 2.91343400  |
| C | -3.78630800 | -0.19823000 | 2.15643000  |
| C | -3.80544900 | -0.82495400 | 0.91222900  |
| C | -4.92704800 | -1.45663100 | 0.41045800  |
| H | -6.98916900 | -1.89544000 | 0.81290100  |
| H | -7.03075200 | -0.72710400 | 3.00175100  |
| H | -4.93612700 | 0.34056800  | 3.88040200  |
| H | -4.92098000 | -1.97266900 | -0.54150000 |
| I | -1.88373800 | -0.69198100 | -0.11993100 |
| C | -2.52652100 | 0.36841500  | 2.67015300  |
| O | -2.41501900 | 1.02307200  | 3.69740600  |
| N | -1.43914600 | 0.05389200  | 1.85211600  |
| C | -0.14175800 | 0.55351600  | 1.88127300  |
| C | 0.38121700  | 1.15092600  | 3.15126800  |
| H | -0.16572000 | 2.07119600  | 3.37588600  |



|   |             |             |             |
|---|-------------|-------------|-------------|
| H | 0.21401600  | 0.46358500  | 3.98494600  |
| H | 1.44254700  | 1.35443900  | 3.01685000  |
| O | 0.51339800  | 0.43723600  | 0.85284100  |
| C | -2.65770400 | 2.86368900  | 0.46294000  |
| C | -3.60310100 | 2.44492100  | -0.47461200 |
| C | -3.23685500 | 2.22499400  | -1.81099200 |
| C | -1.90342500 | 2.42923000  | -2.18249200 |
| C | -0.95630400 | 2.85932400  | -1.25098800 |
| C | -1.33143500 | 3.07799000  | 0.07544800  |
| H | -2.95341900 | 3.02764600  | 1.49654600  |
| H | -4.63387100 | 2.29031500  | -0.16485700 |
| H | -1.60458200 | 2.25550700  | -3.21297000 |
| H | 0.06678000  | 3.03239600  | -1.56884800 |
| H | -0.60062500 | 3.41806700  | 0.80078000  |
| C | -4.25275800 | 1.75846400  | -2.82679300 |
| H | -5.10860000 | 2.44272100  | -2.84406200 |
| H | -3.81077900 | 1.76758000  | -3.82707300 |
| C | -4.81912100 | 0.35107000  | -2.53691300 |
| H | -5.32514300 | 0.33681800  | -1.56389500 |
| H | -5.58774800 | 0.10595600  | -3.28181300 |
| C | -3.83754900 | -0.72399500 | -2.56571400 |
| C | -3.04409800 | -1.65057400 | -2.56015900 |
| H | -2.40313700 | -2.48990600 | -2.74106600 |
| S | 0.49037900  | -1.18723000 | -2.34196500 |
| C | 0.43182400  | -2.95569500 | -2.23085000 |
| F | 0.06068500  | -3.43205100 | -1.00188800 |
| F | -0.45755300 | -3.53192500 | -3.10579100 |
| F | 1.62589300  | -3.56584100 | -2.49312900 |
| C | 2.49336600  | 3.62807100  | 0.51086800  |
| C | 2.66912400  | 2.27339500  | -0.16584200 |
| C | 3.43953600  | 2.36953700  | -1.48440200 |
| H | 1.67166100  | 1.89235300  | -0.40185000 |
| O | 3.35749100  | 1.44852800  | 0.73665300  |
| H | 3.13624000  | 0.52047900  | 0.49580800  |
| F | 4.66541800  | 2.90415600  | -1.32635000 |

|                                          |                |             |                             |
|------------------------------------------|----------------|-------------|-----------------------------|
| F                                        | 3.59917000     | 1.13634100  | -2.00477200                 |
| F                                        | 2.77836500     | 3.11529000  | -2.39701400                 |
| F                                        | 3.66850700     | 4.16312900  | 0.88838600                  |
| F                                        | 1.73541300     | 3.50072200  | 1.62219500                  |
| F                                        | 1.87473800     | 4.51272600  | -0.29822500                 |
| C                                        | 4.59677500     | -2.20261900 | 0.57834600                  |
| C                                        | 3.08035400     | -2.19444300 | 0.38101300                  |
| C                                        | 2.30875100     | -2.30611900 | 1.70192300                  |
| H                                        | 2.81945200     | -3.06574700 | -0.22769800                 |
| O                                        | 2.78223600     | -0.98560200 | -0.25326100                 |
| H                                        | 2.03432400     | -1.07623700 | -0.90987100                 |
| F                                        | 2.53300200     | -1.24866000 | 2.50846300                  |
| F                                        | 0.98231300     | -2.35454300 | 1.45901900                  |
| F                                        | 2.63680000     | -3.42114100 | 2.38164600                  |
| F                                        | 5.00592000     | -1.13023800 | 1.28905200                  |
| F                                        | 5.20691200     | -2.15321600 | -0.61866600                 |
| F                                        | 5.02113600     | -3.30842600 | 1.21676900                  |
| Zero-point correction=                   |                |             | 0.454721 (Hartree/Particle) |
| Thermal correction to Energy=            |                |             | 0.504183                    |
| Thermal correction to Enthalpy=          |                |             | 0.505127                    |
| Thermal correction to Gibbs Free Energy= |                |             | 0.365478                    |
| SCF Done: E(RM062X) =                    | -3552.46670962 |             |                             |

## IM2

|   |             |            |             |
|---|-------------|------------|-------------|
| C | 3.23451400  | 2.04907500 | 1.68544500  |
| C | 3.49114800  | 3.19299200 | 0.92575600  |
| C | 2.64304800  | 3.54859800 | -0.11856500 |
| C | 1.53194100  | 2.75006100 | -0.40371300 |
| C | 1.31087700  | 1.61903400 | 0.37847400  |
| C | 2.12508600  | 1.23525400 | 1.42134300  |
| H | 3.90181000  | 1.76651000 | 2.49085200  |
| H | 4.35794300  | 3.80580900 | 1.15039000  |
| H | 2.81485700  | 4.43239700 | -0.72601200 |
| H | 1.93858900  | 0.34828300 | 2.01135700  |
| I | -0.48162400 | 0.57585300 | -0.19113700 |

|   |             |             |             |
|---|-------------|-------------|-------------|
| C | 0.58777700  | 3.10934900  | -1.47673200 |
| O | 0.64039900  | 4.13265300  | -2.14318300 |
| N | -0.41675400 | 2.14950500  | -1.64277200 |
| C | -1.60806400 | 2.23850900  | -2.34135800 |
| C | -1.80141400 | 3.34463600  | -3.32926900 |
| H | -1.81572100 | 4.30525900  | -2.80457400 |
| H | -0.97138100 | 3.37562300  | -4.03973300 |
| H | -2.75005600 | 3.17487700  | -3.84021800 |
| O | -2.46273300 | 1.37932600  | -2.11492700 |
| C | -2.94206300 | 3.35399400  | 0.51199200  |
| C | -3.22790900 | 2.28090500  | 1.35617200  |
| C | -2.34978200 | 1.92150300  | 2.38835200  |
| C | -1.19978900 | 2.69756700  | 2.58530600  |
| C | -0.90923600 | 3.77135400  | 1.74109400  |
| C | -1.77040000 | 4.09541000  | 0.69104000  |
| H | -3.62227200 | 3.59491300  | -0.30056300 |
| H | -4.12022300 | 1.68603800  | 1.18615800  |
| H | -0.50117800 | 2.45251600  | 3.37954500  |
| H | 0.00167700  | 4.34279700  | 1.89433100  |
| H | -1.52544100 | 4.91289200  | 0.01790500  |
| C | -2.64233800 | 0.69081700  | 3.22139800  |
| H | -3.12868300 | 0.98122000  | 4.16080800  |
| H | -3.34738500 | 0.04913400  | 2.68595200  |
| C | -1.40415200 | -0.14533400 | 3.61910600  |
| H | -0.68718300 | 0.45592100  | 4.18785100  |
| H | -1.73443900 | -0.94755800 | 4.29269100  |
| C | -0.70033700 | -0.80599000 | 2.52846700  |
| C | -0.09528000 | -1.40142000 | 1.64936400  |
| H | 0.45052200  | -2.06165300 | 1.00397900  |
| S | 3.90646600  | -2.90612800 | 1.80247600  |
| C | 4.67968500  | -1.37853600 | 2.22893100  |
| F | 4.88055400  | -0.53492700 | 1.16524400  |
| F | 3.96572300  | -0.61748500 | 3.13493100  |
| F | 5.91136500  | -1.51432000 | 2.80603300  |
| C | -3.06162800 | -2.78488500 | -0.15303900 |

|   |             |             |             |
|---|-------------|-------------|-------------|
| C | -3.96570600 | -1.61600600 | -0.54428500 |
| C | -5.31902900 | -1.64145500 | 0.17054000  |
| H | -4.15590500 | -1.70029900 | -1.61909900 |
| O | -3.30816400 | -0.42867100 | -0.19643500 |
| H | -3.39423500 | 0.21431600  | -0.92228800 |
| F | -6.04977600 | -0.58064000 | -0.22468600 |
| F | -5.18344400 | -1.56109400 | 1.50976300  |
| F | -6.01546100 | -2.75837900 | -0.10788400 |
| F | -3.59758100 | -3.96214600 | -0.51929700 |
| F | -1.86817600 | -2.65901400 | -0.77265400 |
| F | -2.82822700 | -2.82925500 | 1.17144000  |
| C | 1.86576300  | -2.49855200 | -2.32201900 |
| C | 2.82063100  | -1.65453900 | -1.47492100 |
| C | 3.18586800  | -0.32565100 | -2.14239400 |
| H | 3.75346400  | -2.22340400 | -1.37999600 |
| O | 2.22034500  | -1.41192100 | -0.24268000 |
| H | 2.73823600  | -1.91484600 | 0.45924100  |
| F | 3.95816100  | 0.40988900  | -1.32606200 |
| F | 2.09331500  | 0.41935700  | -2.44140700 |
| F | 3.86025500  | -0.52156700 | -3.29209800 |
| F | 2.36722700  | -2.77064000 | -3.54225700 |
| F | 1.62964000  | -3.66784000 | -1.69627800 |
| F | 0.67007500  | -1.89312800 | -2.49807900 |

Zero-point correction= 0.453301 (Hartree/Particle)

Thermal correction to Energy= 0.503078

Thermal correction to Enthalpy= 0.504022

Thermal correction to Gibbs Free Energy= 0.361726

SCF Done: E(RM062X) = -3552.46227044

## TS2

|   |            |            |             |
|---|------------|------------|-------------|
| C | 2.83820500 | 2.68438800 | 0.58905300  |
| C | 2.58739100 | 4.01327200 | 0.24151900  |
| C | 1.40938000 | 4.35570800 | -0.41726600 |
| C | 0.47291000 | 3.36490000 | -0.72699300 |
| C | 0.75839200 | 2.05261200 | -0.35604000 |

|   |             |             |             |
|---|-------------|-------------|-------------|
| C | 1.91638800  | 1.67365200  | 0.28846400  |
| H | 3.75020700  | 2.41352800  | 1.10879300  |
| H | 3.31163800  | 4.78294000  | 0.48787700  |
| H | 1.18305400  | 5.38104500  | -0.69474500 |
| H | 2.12424100  | 0.64978900  | 0.55544700  |
| I | -0.86233200 | 0.68350000  | -0.76540200 |
| C | -0.81791500 | 3.71476200  | -1.36007700 |
| O | -1.17500900 | 4.86930500  | -1.57264500 |
| N | -1.57975300 | 2.59444500  | -1.65620800 |
| C | -2.92582700 | 2.54856900  | -1.95426800 |
| C | -3.62991200 | 3.78938600  | -2.41558400 |
| H | -3.65936000 | 4.52016900  | -1.60121900 |
| H | -3.09205000 | 4.25611400  | -3.24473000 |
| H | -4.64222900 | 3.51120300  | -2.71277800 |
| O | -3.51398000 | 1.46750400  | -1.84265900 |
| C | -3.41654000 | 2.60341300  | 1.36050000  |
| C | -3.30863200 | 1.29638500  | 1.83322600  |
| C | -2.13706000 | 0.85265300  | 2.46390100  |
| C | -1.08800900 | 1.76329700  | 2.64333400  |
| C | -1.19401100 | 3.07343500  | 2.17045100  |
| C | -2.35280000 | 3.49685700  | 1.51788000  |
| H | -4.32360600 | 2.91676900  | 0.85059800  |
| H | -4.12381500 | 0.59701700  | 1.67360700  |
| H | -0.16361800 | 1.45378600  | 3.11968700  |
| H | -0.35874000 | 3.75650000  | 2.29527500  |
| H | -2.41945400 | 4.50836200  | 1.12593400  |
| C | -2.03513000 | -0.59841900 | 2.88235500  |
| H | -2.38743800 | -0.72053800 | 3.91397700  |
| H | -2.69046100 | -1.20386700 | 2.25284300  |
| C | -0.60813900 | -1.20583000 | 2.85691200  |
| H | 0.05683100  | -0.70361800 | 3.56223600  |
| H | -0.68252800 | -2.25262600 | 3.17654600  |
| C | 0.01426100  | -1.21169500 | 1.54944400  |
| C | 0.36991200  | -1.14911200 | 0.36197900  |
| H | 1.09757100  | -1.48841100 | -0.35902600 |

|                                          |                |             |                             |
|------------------------------------------|----------------|-------------|-----------------------------|
| S                                        | 2.79698300     | -2.19113200 | 2.70288900                  |
| C                                        | 3.22273200     | -0.52186000 | 3.11738400                  |
| F                                        | 4.12640800     | 0.05309800  | 2.25818800                  |
| F                                        | 2.15859400     | 0.35369100  | 3.11740900                  |
| F                                        | 3.77681800     | -0.38381700 | 4.35554200                  |
| C                                        | -2.69151500    | -3.09616000 | -0.78950300                 |
| C                                        | -3.86117900    | -2.11587500 | -0.87997100                 |
| C                                        | -5.06151100    | -2.53888300 | -0.02907000                 |
| H                                        | -4.18729800    | -2.09516700 | -1.92491500                 |
| O                                        | -3.40172000    | -0.87667100 | -0.42099900                 |
| H                                        | -3.75550100    | -0.15354600 | -0.97349000                 |
| F                                        | -6.03242400    | -1.61168600 | -0.13787200                 |
| F                                        | -4.74407400    | -2.63907700 | 1.27774400                  |
| F                                        | -5.56578700    | -3.72249200 | -0.42383200                 |
| F                                        | -3.03766600    | -4.32056900 | -1.22251500                 |
| F                                        | -1.67253100    | -2.65555100 | -1.55919300                 |
| F                                        | -2.22462400    | -3.21709000 | 0.46791800                  |
| C                                        | 3.97204700     | -2.42294500 | -2.09735200                 |
| C                                        | 4.30600100     | -1.48301500 | -0.93753700                 |
| C                                        | 4.80367500     | -0.11444500 | -1.40491400                 |
| H                                        | 5.11101200     | -1.94508100 | -0.35579600                 |
| O                                        | 3.13920100     | -1.27787300 | -0.20291500                 |
| H                                        | 3.17316300     | -1.72788200 | 0.68699100                  |
| F                                        | 5.16816100     | 0.62782000  | -0.34189600                 |
| F                                        | 3.84388800     | 0.56664900  | -2.06465500                 |
| F                                        | 5.87076100     | -0.21684000 | -2.22109700                 |
| F                                        | 5.03874500     | -2.68110600 | -2.87688900                 |
| F                                        | 3.52137000     | -3.59391600 | -1.60750800                 |
| F                                        | 2.99924000     | -1.91393600 | -2.88387500                 |
| Zero-point correction=                   |                |             | 0.453072 (Hartree/Particle) |
| Thermal correction to Energy=            |                |             | 0.501981                    |
| Thermal correction to Enthalpy=          |                |             | 0.502926                    |
| Thermal correction to Gibbs Free Energy= |                |             | 0.362854                    |
| SCF Done: E(RM062X) =                    | -3552.44866309 |             |                             |

**IM3**

|   |             |             |             |
|---|-------------|-------------|-------------|
| C | -2.94338200 | 2.20562300  | 1.98918900  |
| C | -2.26343400 | 3.12876100  | 2.78502000  |
| C | -0.87225400 | 3.14016400  | 2.80185000  |
| C | -0.13551900 | 2.21901300  | 2.04448800  |
| C | -0.85741200 | 1.31602500  | 1.27055000  |
| C | -2.23683100 | 1.28760900  | 1.20787900  |
| H | -4.02866700 | 2.18594100  | 1.95949800  |
| H | -2.81777400 | 3.84388200  | 3.38491900  |
| H | -0.31627100 | 3.86507100  | 3.38844900  |
| H | -2.77627000 | 0.59480300  | 0.58078400  |
| I | 0.28649100  | -0.09638200 | 0.05970500  |
| C | 1.35851200  | 2.31899000  | 2.01506800  |
| O | 1.91974300  | 3.31862200  | 2.48643600  |
| N | 1.92397100  | 1.25380700  | 1.39238000  |
| C | 3.18356300  | 1.23428600  | 0.89124700  |
| C | 4.24194900  | 2.21629200  | 1.31895700  |
| H | 3.99106300  | 3.21548300  | 0.94715300  |
| H | 4.28441700  | 2.29167000  | 2.40830700  |
| H | 5.20921800  | 1.90814800  | 0.91654000  |
| O | 3.44546800  | 0.35336100  | 0.03774900  |
| C | 0.98466700  | 4.07659400  | -0.63186100 |
| C | 1.02510800  | 2.99622600  | -1.51022900 |
| C | -0.15458000 | 2.46189300  | -2.05459200 |
| C | -1.37706100 | 3.03000000  | -1.68113500 |
| C | -1.42001100 | 4.11141200  | -0.79545500 |
| C | -0.24290100 | 4.63898100  | -0.26937600 |
| H | 1.90543800  | 4.46933000  | -0.21033500 |
| H | 1.98087700  | 2.53948500  | -1.76099600 |
| H | -2.30992800 | 2.62760900  | -2.06137400 |
| H | -2.38067200 | 4.52893800  | -0.50710000 |
| H | -0.27736100 | 5.46966500  | 0.42939500  |
| C | -0.05061100 | 1.30975700  | -3.03408400 |
| H | 0.21524100  | 1.72201600  | -4.01678300 |
| H | 0.79434000  | 0.66865100  | -2.76258000 |

|   |             |             |             |
|---|-------------|-------------|-------------|
| C | -1.30625600 | 0.46680000  | -3.27701500 |
| H | -2.10348800 | 1.11132500  | -3.66159100 |
| H | -1.09178100 | -0.22185600 | -4.10463300 |
| C | -1.90374500 | -0.38725500 | -2.18576300 |
| C | -1.51970600 | -0.74820900 | -0.96009600 |
| H | -2.10944900 | -1.42185500 | -0.35356700 |
| S | -3.45775900 | -1.20460500 | -2.68473300 |
| C | -4.56959700 | 0.23543000  | -2.59456300 |
| F | -4.29603000 | 1.04896300  | -1.55628800 |
| F | -4.53784600 | 1.00545800  | -3.70193700 |
| F | -5.82731600 | -0.21716600 | -2.45507800 |
| C | 5.61083500  | -2.36883200 | -0.81573200 |
| C | 6.08866500  | -1.13707500 | -0.04321100 |
| C | 7.58301700  | -1.15932200 | 0.25674700  |
| H | 5.55859500  | -1.13455500 | 0.91778000  |
| O | 5.84501800  | 0.01435700  | -0.80563100 |
| H | 4.90138300  | 0.27834900  | -0.59907500 |
| F | 7.91129600  | -0.08775300 | 1.00511200  |
| F | 8.32074700  | -1.10862200 | -0.86931300 |
| F | 7.94587900  | -2.26493800 | 0.93770800  |
| F | 5.80808500  | -3.51279700 | -0.12939700 |
| F | 4.28595000  | -2.26036900 | -1.05698200 |
| F | 6.22831500  | -2.48999500 | -2.00661600 |
| C | -4.78853900 | -3.04265600 | 0.70771800  |
| C | -4.88330200 | -1.74193900 | 1.51339900  |
| C | -3.84311600 | -1.66121100 | 2.63165300  |
| H | -5.86757400 | -1.73241300 | 1.99190300  |
| O | -4.67744900 | -0.64691000 | 0.66307200  |
| H | -5.53248100 | -0.27432000 | 0.40725100  |
| F | -4.02389000 | -0.53538100 | 3.34332900  |
| F | -2.57922100 | -1.63977800 | 2.15264800  |
| F | -3.94299100 | -2.70865600 | 3.46948400  |
| F | -5.08860400 | -4.11566800 | 1.46297900  |
| F | -5.65587200 | -2.99781500 | -0.31928900 |
| F | -3.55595900 | -3.24100500 | 0.19184100  |



|                                          |                             |
|------------------------------------------|-----------------------------|
| Zero-point correction=                   | 0.457886 (Hartree/Particle) |
| Thermal correction to Energy=            | 0.506389                    |
| Thermal correction to Enthalpy=          | 0.507333                    |
| Thermal correction to Gibbs Free Energy= | 0.367393                    |

SCF Done: E(RM062X) = -3552.50383871

### TS3

|   |             |             |             |
|---|-------------|-------------|-------------|
| C | -3.18157700 | 2.88133500  | 0.92197000  |
| C | -2.49821500 | 4.08469400  | 1.09858100  |
| C | -1.25972300 | 4.28681500  | 0.49454100  |
| C | -0.66591900 | 3.28713700  | -0.28899300 |
| C | -1.40798700 | 2.12359100  | -0.47000400 |
| C | -2.64691000 | 1.88362100  | 0.10471900  |
| H | -4.14205100 | 2.71239600  | 1.39865400  |
| H | -2.92787100 | 4.86778300  | 1.71530800  |
| H | -0.71094900 | 5.21218600  | 0.64149800  |
| H | -3.18086800 | 0.95662600  | -0.05424000 |
| I | -0.70923500 | 0.61217700  | -1.86036600 |
| C | 0.72986600  | 3.55029100  | -0.80006300 |
| O | 0.95304700  | 4.58374800  | -1.43814400 |
| N | 1.63549500  | 2.61684500  | -0.40184200 |
| C | 2.96432300  | 2.60069500  | -0.73705900 |
| C | 3.52187400  | 3.48357200  | -1.81557800 |
| H | 2.89700900  | 3.46312600  | -2.71284800 |
| H | 3.53633800  | 4.52172500  | -1.46679800 |
| H | 4.53799100  | 3.15526600  | -2.04256500 |
| O | 3.69674800  | 1.81418200  | -0.10962400 |
| C | -5.16501600 | 0.77825500  | -2.16049300 |
| C | -4.19058500 | -0.08362100 | -2.66217700 |
| C | -3.75965600 | -1.19744400 | -1.92579600 |
| C | -4.33260400 | -1.42307800 | -0.66793000 |
| C | -5.31018300 | -0.56109300 | -0.16225700 |
| C | -5.72976000 | 0.54295500  | -0.90435800 |
| H | -5.47890800 | 1.63662900  | -2.74804700 |
| H | -3.75479600 | 0.10969200  | -3.63961400 |

|   |             |             |             |
|---|-------------|-------------|-------------|
| H | -4.03214100 | -2.27695300 | -0.07393200 |
| H | -5.73725700 | -0.75454200 | 0.81795500  |
| H | -6.48394100 | 1.21653700  | -0.50758200 |
| C | -2.72092700 | -2.12509800 | -2.52414200 |
| H | -3.23052600 | -2.86906400 | -3.15034600 |
| H | -2.08726100 | -1.56880100 | -3.22323800 |
| C | -1.86685000 | -2.93214700 | -1.53820800 |
| H | -2.49867500 | -3.65996800 | -1.02163200 |
| H | -1.14190400 | -3.53235800 | -2.10384600 |
| C | -1.09350100 | -2.19867000 | -0.47690600 |
| C | -0.60866400 | -0.97538600 | -0.33408800 |
| H | -0.03977000 | -0.49809400 | 0.47128700  |
| S | -0.54800800 | -3.18286900 | 0.95254200  |
| C | -2.01835300 | -2.98947900 | 2.01317100  |
| F | -2.39757200 | -1.71071600 | 2.14586700  |
| F | -3.08979000 | -3.67806200 | 1.56402600  |
| F | -1.70301400 | -3.47373100 | 3.22341300  |
| C | 0.58546300  | 2.00042800  | 3.09455600  |
| C | 1.48420300  | 0.95222100  | 2.41916100  |
| C | 1.42995200  | -0.38356100 | 3.16621300  |
| H | 2.52029300  | 1.32063700  | 2.50847500  |
| O | 1.08477300  | 0.75364700  | 1.11917800  |
| H | 1.34042000  | 1.70469800  | 0.40256100  |
| F | 2.14801300  | -1.31397300 | 2.50822100  |
| F | 0.16382600  | -0.85175600 | 3.27282600  |
| F | 1.93115000  | -0.29557000 | 4.41645800  |
| F | 0.82316300  | 2.12672900  | 4.41865400  |
| F | 0.79811000  | 3.21346300  | 2.53513400  |
| F | -0.72404800 | 1.71577700  | 2.94102500  |
| C | 2.83150500  | -0.97984300 | -2.35570800 |
| C | 3.28653400  | -1.11816400 | -0.89992800 |
| C | 3.36540000  | -2.57542000 | -0.45435400 |
| H | 2.55867500  | -0.60973200 | -0.25619400 |
| O | 4.58164000  | -0.58391800 | -0.78797600 |
| H | 4.48446400  | 0.36087000  | -0.52865300 |

|                                          |                |             |                             |
|------------------------------------------|----------------|-------------|-----------------------------|
| F                                        | 4.24736600     | -3.27979400 | -1.19010000                 |
| F                                        | 3.75721500     | -2.64866000 | 0.82739500                  |
| F                                        | 2.16572700     | -3.19355800 | -0.56012700                 |
| F                                        | 3.68655900     | -1.56092500 | -3.21195600                 |
| F                                        | 2.75274300     | 0.32745900  | -2.68919200                 |
| F                                        | 1.60666700     | -1.52367900 | -2.57178900                 |
| Zero-point correction=                   |                |             | 0.451879 (Hartree/Particle) |
| Thermal correction to Energy=            |                |             | 0.500045                    |
| Thermal correction to Enthalpy=          |                |             | 0.500989                    |
| Thermal correction to Gibbs Free Energy= |                |             | 0.362859                    |
| SCF Done: E(RM062X) =                    | -3552.48982744 |             |                             |

#### IM4

|   |             |             |             |
|---|-------------|-------------|-------------|
| C | -3.18146000 | 2.88105300  | 0.92285500  |
| C | -2.49840100 | 4.08426200  | 1.10006300  |
| C | -1.25977300 | 4.28690300  | 0.49636700  |
| C | -0.66718400 | 3.28719600  | -0.28714800 |
| C | -1.40778900 | 2.12250900  | -0.46943800 |
| C | -2.64665300 | 1.88351100  | 0.10529400  |
| H | -4.14193500 | 2.71191100  | 1.39943700  |
| H | -2.92791500 | 4.86713300  | 1.71701200  |
| H | -0.71085800 | 5.21192800  | 0.64445700  |
| H | -3.18066400 | 0.95659100  | -0.05387700 |
| I | -0.70915100 | 0.61278900  | -1.86018600 |
| C | 0.72397000  | 3.55268400  | -0.79772800 |
| O | 0.95470500  | 4.58107600  | -1.43519900 |
| N | 1.63669000  | 2.61730600  | -0.40106900 |
| C | 2.97009700  | 2.59942400  | -0.73583100 |
| C | 3.52105200  | 3.48430300  | -1.81351000 |
| H | 2.89589600  | 3.46280400  | -2.71040200 |
| H | 3.53578500  | 4.52208400  | -1.46387300 |
| H | 4.53691200  | 3.15529900  | -2.03938400 |
| O | 3.69594200  | 1.81429900  | -0.10840500 |
| C | -5.16486600 | 0.77901300  | -2.16051100 |
| C | -4.19040400 | -0.08269700 | -2.66244500 |

|   |             |             |             |
|---|-------------|-------------|-------------|
| C | -3.75954100 | -1.19680900 | -1.92646100 |
| C | -4.33260000 | -1.42290900 | -0.66871500 |
| C | -5.31020700 | -0.56110400 | -0.16279800 |
| C | -5.72971400 | 0.54324100  | -0.90451000 |
| H | -5.47873600 | 1.63759500  | -2.74778300 |
| H | -3.75455200 | 0.11094400  | -3.63978900 |
| H | -4.03211800 | -2.27694800 | -0.07497600 |
| H | -5.73733300 | -0.75490800 | 0.81731800  |
| H | -6.48393500 | 1.21666600  | -0.50753600 |
| C | -2.72078700 | -2.12426000 | -2.52505400 |
| H | -3.23037400 | -2.86793300 | -3.15164000 |
| H | -2.08706800 | -1.56765600 | -3.22391100 |
| C | -1.86677100 | -2.93162300 | -1.53936000 |
| H | -2.49869700 | -3.65949600 | -1.02299100 |
| H | -1.14190900 | -3.53166500 | -2.10525200 |
| C | -1.09333700 | -2.19815900 | -0.47774200 |
| C | -0.60744000 | -0.97551500 | -0.33192300 |
| H | -0.03315700 | -0.48892400 | 0.47236700  |
| S | -0.54815800 | -3.18328400 | 0.95137800  |
| C | -2.01844100 | -2.99022000 | 2.01195500  |
| F | -2.39784500 | -1.71167600 | 2.14513800  |
| F | -3.09002800 | -3.67877300 | 1.56248500  |
| F | -1.70337900 | -3.47510100 | 3.22208200  |
| C | 0.58601600  | 1.99727100  | 3.09469800  |
| C | 1.48212700  | 0.94862200  | 2.41500500  |
| C | 1.42978700  | -0.38370200 | 3.16672200  |
| H | 2.51967600  | 1.31966000  | 2.51374000  |
| O | 1.08292500  | 0.74924300  | 1.12223200  |
| H | 1.36225900  | 1.82521300  | 0.30465100  |
| F | 2.14790400  | -1.31556200 | 2.50858300  |
| F | 0.16338700  | -0.85360900 | 3.27299300  |
| F | 1.93110800  | -0.29826900 | 4.41796000  |
| F | 0.82258200  | 2.12533600  | 4.42007900  |
| F | 0.79791200  | 3.21260600  | 2.53638700  |
| F | -0.72469700 | 1.71489700  | 2.94203600  |

|                                          |                |             |                             |
|------------------------------------------|----------------|-------------|-----------------------------|
| C                                        | 2.83163700     | -0.97934900 | -2.35556300                 |
| C                                        | 3.28620600     | -1.11791000 | -0.89974000                 |
| C                                        | 3.36525200     | -2.57538000 | -0.45482400                 |
| H                                        | 2.55867400     | -0.60878700 | -0.25495300                 |
| O                                        | 4.58188100     | -0.58433900 | -0.78802500                 |
| H                                        | 4.48778500     | 0.35815500  | -0.52530600                 |
| F                                        | 4.24738800     | -3.27954100 | -1.19091700                 |
| F                                        | 3.75711900     | -2.64919700 | 0.82675500                  |
| F                                        | 2.16570000     | -3.19353900 | -0.56107700                 |
| F                                        | 3.68674200     | -1.55986300 | -3.21214300                 |
| F                                        | 2.75290600     | 0.32840800  | -2.68874900                 |
| F                                        | 1.60683800     | -1.52283500 | -2.57214200                 |
| Zero-point correction=                   |                |             | 0.455299 (Hartree/Particle) |
| Thermal correction to Energy=            |                |             | 0.503697                    |
| Thermal correction to Enthalpy=          |                |             | 0.504641                    |
| Thermal correction to Gibbs Free Energy= |                |             | 0.364438                    |
| SCF Done: E(RM062X) =                    | -3552.48899379 |             |                             |

#### TS4

|   |             |            |             |
|---|-------------|------------|-------------|
| C | -3.53075000 | 2.30250500 | 1.38468000  |
| C | -3.02790600 | 3.45303300 | 1.99155700  |
| C | -1.77779900 | 3.94655300 | 1.62544300  |
| C | -1.01060000 | 3.29583900 | 0.65049100  |
| C | -1.57264900 | 2.18601100 | 0.01682800  |
| C | -2.81078800 | 1.66798100 | 0.37007600  |
| H | -4.49440300 | 1.89801000 | 1.67845900  |
| H | -3.60198000 | 3.95959600 | 2.76099100  |
| H | -1.35730000 | 4.82129300 | 2.11269900  |
| H | -3.20974100 | 0.79105400 | -0.11985200 |
| I | -0.60893200 | 1.31735500 | -1.70154100 |
| C | 0.38541700  | 3.80118900 | 0.43813400  |
| O | 0.61030300  | 4.98014400 | 0.18244400  |
| N | 1.35509500  | 2.84898500 | 0.65814800  |
| C | 2.72546100  | 2.98113400 | 0.53074900  |
| C | 3.32000300  | 4.23435300 | -0.02927700 |

|   |             |             |             |
|---|-------------|-------------|-------------|
| H | 2.85558000  | 4.49794300  | -0.98392800 |
| H | 3.13578200  | 5.07038600  | 0.65334700  |
| H | 4.39302100  | 4.07778100  | -0.15065100 |
| O | 3.41419200  | 2.02558800  | 0.90328900  |
| C | -5.16000800 | 0.94636000  | -2.11283000 |
| C | -4.07553100 | 0.38934900  | -2.78867100 |
| C | -3.51770300 | -0.83266500 | -2.38264800 |
| C | -4.07355300 | -1.47806900 | -1.27102900 |
| C | -5.15894100 | -0.92003500 | -0.58858300 |
| C | -5.70795300 | 0.29205400  | -1.00629800 |
| H | -5.57266200 | 1.89478800  | -2.44565600 |
| H | -3.65343400 | 0.90764700  | -3.64614000 |
| H | -3.67848700 | -2.42752900 | -0.93191600 |
| H | -5.57042400 | -1.43753900 | 0.27370200  |
| H | -6.54900200 | 0.72657100  | -0.47359000 |
| C | -2.37352100 | -1.41863800 | -3.18419000 |
| H | -2.78792800 | -1.95033300 | -4.05104500 |
| H | -1.77465100 | -0.60924600 | -3.61208900 |
| C | -1.47206200 | -2.43220800 | -2.47236200 |
| H | -2.04416800 | -3.33288600 | -2.23247600 |
| H | -0.68520200 | -2.75779600 | -3.16434900 |
| C | -0.78975000 | -2.00598200 | -1.20478800 |
| C | -0.38154200 | -0.95732200 | -0.53607500 |
| H | 0.18472600  | -0.43227900 | 0.45390700  |
| S | -0.13262300 | -3.27445300 | -0.08127700 |
| C | -1.63753300 | -3.60920200 | 0.91010300  |
| F | -2.18121100 | -2.49592800 | 1.41187000  |
| F | -2.59147400 | -4.24018900 | 0.19526000  |
| F | -1.27908100 | -4.41466100 | 1.91893000  |
| C | -0.32349700 | 0.44063200  | 3.31768200  |
| C | 0.99447600  | 0.04979300  | 2.63276600  |
| C | 1.35906600  | -1.40475900 | 2.97567400  |
| H | 1.78179500  | 0.66446000  | 3.09856200  |
| O | 0.92422500  | 0.28221700  | 1.28136900  |
| H | 1.07352000  | 1.87743800  | 0.95099600  |

|                                          |                |             |                             |
|------------------------------------------|----------------|-------------|-----------------------------|
| F                                        | 2.31295300     | -1.86104600 | 2.14579800                  |
| F                                        | 0.30090700     | -2.24697200 | 2.88088400                  |
| F                                        | 1.82943100     | -1.51299400 | 4.23745400                  |
| F                                        | -0.37236700    | 0.05865600  | 4.61433500                  |
| F                                        | -0.47777500    | 1.78211900  | 3.29162700                  |
| F                                        | -1.39294700    | -0.09682200 | 2.69464800                  |
| C                                        | 3.12276400     | 0.15944700  | -2.25216900                 |
| C                                        | 3.47602200     | -0.45835500 | -0.89639300                 |
| C                                        | 3.69738700     | -1.96556900 | -0.98882300                 |
| H                                        | 2.64167600     | -0.28185400 | -0.20645700                 |
| O                                        | 4.68537700     | 0.10517700  | -0.45181800                 |
| H                                        | 4.45983400     | 0.87435200  | 0.11391400                  |
| F                                        | 4.69342800     | -2.27957100 | -1.84017800                 |
| F                                        | 4.02324300     | -2.46345000 | 0.21426900                  |
| F                                        | 2.58291800     | -2.60475200 | -1.41679800                 |
| F                                        | 4.10956000     | 0.00715700  | -3.15198700                 |
| F                                        | 2.91252400     | 1.48671800  | -2.11070500                 |
| F                                        | 1.99870500     | -0.37703500 | -2.78606000                 |
| Zero-point correction=                   |                |             | 0.452342 (Hartree/Particle) |
| Thermal correction to Energy=            |                |             | 0.500488                    |
| Thermal correction to Enthalpy=          |                |             | 0.501432                    |
| Thermal correction to Gibbs Free Energy= |                |             | 0.365161                    |
| SCF Done: E(RM062X) =                    | -3552.47644512 |             |                             |

## IM5

|   |             |             |             |
|---|-------------|-------------|-------------|
| C | -2.12920800 | -1.06367000 | 1.34119400  |
| C | -1.68941700 | 0.25735200  | 1.24560300  |
| C | -1.80655300 | 0.96490300  | 0.04319800  |
| C | -2.38645500 | 0.32390800  | -1.05926300 |
| C | -2.83156100 | -0.99413100 | -0.96618700 |
| C | -2.69987600 | -1.69405600 | 0.23507200  |
| H | -2.02563500 | -1.59952600 | 2.28074600  |
| H | -1.24081800 | 0.74104000  | 2.10875500  |
| H | -2.48611200 | 0.86249200  | -1.99884600 |
| H | -3.28087300 | -1.47552000 | -1.83065100 |

|                                          |                |             |                             |
|------------------------------------------|----------------|-------------|-----------------------------|
| H                                        | -3.04323700    | -2.72221200 | 0.30872700                  |
| C                                        | -1.24580000    | 2.35872400  | -0.09479400                 |
| H                                        | -1.86843800    | 2.95566100  | -0.76936500                 |
| H                                        | -1.23524600    | 2.86676500  | 0.87478900                  |
| C                                        | 0.18688300     | 2.35212400  | -0.67791100                 |
| H                                        | 0.19415300     | 1.84437300  | -1.64565200                 |
| H                                        | 0.53101900     | 3.37950100  | -0.84448400                 |
| C                                        | 1.13486300     | 1.67332900  | 0.24400800                  |
| C                                        | 1.55331400     | 1.39733100  | 1.44937700                  |
| S                                        | 2.48100400     | 0.49306700  | -0.09147200                 |
| C                                        | 1.57175400     | -1.12232100 | -0.19756500                 |
| F                                        | 1.11174400     | -1.51883800 | 0.99148100                  |
| F                                        | 0.53835700     | -1.05143900 | -1.04606400                 |
| F                                        | 2.44006100     | -2.03668000 | -0.65617700                 |
| Zero-point correction=                   |                |             | 0.172560 (Hartree/Particle) |
| Thermal correction to Energy=            |                |             | 0.186492                    |
| Thermal correction to Enthalpy=          |                |             | 0.187436                    |
| Thermal correction to Gibbs Free Energy= |                |             | 0.130647                    |
| SCF Done: E(RM062X) =                    | -1122.16947679 |             |                             |

### 6-2HFIP

|   |            |             |             |
|---|------------|-------------|-------------|
| C | 4.78265000 | -0.76127700 | -1.41946100 |
| C | 5.16281300 | -0.67837000 | -0.08020000 |
| C | 4.23771900 | -0.96554700 | 0.91814000  |
| C | 2.91954600 | -1.31830100 | 0.59391900  |
| C | 2.56508500 | -1.42205800 | -0.75577100 |
| C | 3.48697100 | -1.15078900 | -1.76369900 |
| H | 5.49548300 | -0.53847500 | -2.20769300 |
| H | 6.17533200 | -0.39188400 | 0.18588300  |
| H | 4.51138300 | -0.90342900 | 1.96735800  |
| H | 3.20884300 | -1.24723300 | -2.80713000 |
| I | 0.62595300 | -2.15575800 | -1.35421000 |
| C | 1.99363900 | -1.50095100 | 1.75652700  |
| O | 2.25328800 | -2.25377700 | 2.68642400  |
| N | 0.89894300 | -0.65874100 | 1.72946500  |



|                                          |             |             |                             |
|------------------------------------------|-------------|-------------|-----------------------------|
| C                                        | -0.10962300 | -0.50225700 | 2.66607300                  |
| C                                        | -0.20728200 | -1.44313600 | 3.82243100                  |
| H                                        | -0.19460900 | -2.48270100 | 3.48375700                  |
| H                                        | 0.65829600  | -1.31294500 | 4.48048900                  |
| H                                        | -1.12802100 | -1.22078400 | 4.36366600                  |
| O                                        | -0.89079200 | 0.43715400  | 2.49383700                  |
| C                                        | 1.84695300  | 2.96127600  | -0.12871900                 |
| C                                        | 0.47284900  | 2.48594300  | 0.34920900                  |
| C                                        | -0.65245700 | 3.49728800  | 0.11957700                  |
| H                                        | 0.53334800  | 2.31818100  | 1.42794600                  |
| H                                        | 0.81459000  | -0.02037600 | 0.93574600                  |
| F                                        | -1.77406300 | 3.07042700  | 0.72374700                  |
| F                                        | -0.92073800 | 3.64592200  | -1.19302500                 |
| F                                        | -0.34252200 | 4.70689400  | 0.62161000                  |
| F                                        | 2.25771400  | 4.05238600  | 0.53718600                  |
| F                                        | 2.75408100  | 1.98429800  | 0.06531500                  |
| F                                        | 1.84054000  | 3.25322500  | -1.44685000                 |
| C                                        | -3.07528600 | -1.73645000 | 0.41462300                  |
| C                                        | -2.72927700 | -0.27014600 | 0.14764400                  |
| C                                        | -3.31833000 | 0.25792800  | -1.15593000                 |
| H                                        | -1.64341800 | -0.18971300 | 0.05982200                  |
| O                                        | -3.24995100 | 0.51614500  | 1.18874800                  |
| H                                        | -2.55238500 | 0.59562600  | 1.87001800                  |
| F                                        | -2.92526900 | 1.52920600  | -1.35799200                 |
| F                                        | -4.66455000 | 0.24202500  | -1.14388200                 |
| F                                        | -2.90515400 | -0.47057300 | -2.21495100                 |
| F                                        | -2.66303400 | -2.55509500 | -0.57845400                 |
| F                                        | -2.46654300 | -2.14154900 | 1.55171700                  |
| F                                        | -4.39708200 | -1.92089600 | 0.57455500                  |
| O                                        | 0.15056400  | 1.25605500  | -0.24816700                 |
| H                                        | 0.15193100  | 1.33014000  | -1.21669800                 |
| Zero-point correction=                   |             |             | 0.283352 (Hartree/Particle) |
| Thermal correction to Energy=            |             |             | 0.317393                    |
| Thermal correction to Enthalpy=          |             |             | 0.318337                    |
| Thermal correction to Gibbs Free Energy= |             |             | 0.210622                    |

SCF Done: E(RM062X) = -2430.31659262

**TS5**

|   |             |             |             |
|---|-------------|-------------|-------------|
| C | -2.00779500 | -1.21634500 | 1.33900100  |
| C | -1.73955600 | 0.14966500  | 1.24596600  |
| C | -1.94800400 | 0.83840800  | 0.04449700  |
| C | -2.44020700 | 0.13194200  | -1.05989300 |
| C | -2.71478100 | -1.23211900 | -0.96857600 |
| C | -2.49533000 | -1.91120600 | 0.23147900  |
| H | -1.83709000 | -1.73670100 | 2.27741400  |
| H | -1.35729400 | 0.68506800  | 2.11042000  |
| H | -2.60735500 | 0.65560500  | -1.99831200 |
| H | -3.09964300 | -1.76514200 | -1.83377400 |
| H | -2.70640900 | -2.97454500 | 0.30346100  |
| C | -1.58138800 | 2.29487900  | -0.08329600 |
| H | -2.24425000 | 2.80052700  | -0.79214000 |
| H | -1.67917400 | 2.80490500  | 0.87948300  |
| C | -0.13136100 | 2.50089800  | -0.61208400 |
| H | -0.02202200 | 2.00132500  | -1.58165200 |
| H | 0.07826100  | 3.56545200  | -0.76531500 |
| C | 0.84405500  | 1.92340300  | 0.29668600  |
| C | 1.50870500  | 1.42823900  | 1.25949200  |
| S | 2.56244600  | 0.59850900  | -0.07541400 |
| C | 1.70255900  | -1.01350000 | -0.19079200 |
| F | 1.37900900  | -1.51491800 | 1.00892600  |
| F | 0.57652300  | -0.94925100 | -0.91875800 |
| F | 2.54385300  | -1.86674500 | -0.80214800 |

Zero-point correction= 0.171481 (Hartree/Particle)

Thermal correction to Energy= 0.185202

Thermal correction to Enthalpy= 0.186146

Thermal correction to Gibbs Free Energy= 0.128968

SCF Done: E(RM062X) = -1122.15874954

**TS5-1**

|   |            |             |             |
|---|------------|-------------|-------------|
| C | 2.47609500 | -0.63955000 | -1.41546200 |
|---|------------|-------------|-------------|

|                                          |                |             |                             |
|------------------------------------------|----------------|-------------|-----------------------------|
| C                                        | 1.96826900     | 0.61159500  | -1.06655000                 |
| C                                        | 1.69802300     | 0.92634900  | 0.27125400                  |
| C                                        | 1.94971900     | -0.03969200 | 1.25222200                  |
| C                                        | 2.45607600     | -1.29282300 | 0.90726600                  |
| C                                        | 2.72018100     | -1.59661300 | -0.42898100                 |
| H                                        | 2.68146200     | -0.86690700 | -2.45801200                 |
| H                                        | 1.77792400     | 1.35261300  | -1.83786400                 |
| H                                        | 1.74731200     | 0.19245000  | 2.29503000                  |
| H                                        | 2.64631900     | -2.03045300 | 1.68216300                  |
| H                                        | 3.11637600     | -2.57143500 | -0.69963400                 |
| C                                        | 1.12889200     | 2.27254600  | 0.64745700                  |
| H                                        | 1.48167500     | 2.55567400  | 1.64706000                  |
| H                                        | 1.48225800     | 3.03817300  | -0.04745400                 |
| C                                        | -0.40267200    | 2.32260900  | 0.71544200                  |
| H                                        | -0.75872900    | 1.63983000  | 1.49408000                  |
| H                                        | -0.77664000    | 3.31327900  | 0.96927000                  |
| C                                        | -1.36085600    | 1.49711100  | -0.47853300                 |
| C                                        | -0.90490600    | 2.46601000  | -1.16911400                 |
| S                                        | -2.54710800    | 0.28837000  | -0.17447500                 |
| C                                        | -1.49915700    | -1.20116300 | 0.07469000                  |
| F                                        | -0.59713000    | -1.36532800 | -0.89584700                 |
| F                                        | -0.85120400    | -1.17948400 | 1.24879600                  |
| F                                        | -2.33191200    | -2.25467800 | 0.07914100                  |
| Zero-point correction=                   |                |             | 0.170741 (Hartree/Particle) |
| Thermal correction to Energy=            |                |             | 0.184608                    |
| Thermal correction to Enthalpy=          |                |             | 0.185552                    |
| Thermal correction to Gibbs Free Energy= |                |             | 0.128184                    |
| SCF Done: E(RM062X) =                    | -1122.13093622 |             |                             |

## 2t

|   |            |             |             |
|---|------------|-------------|-------------|
| C | 5.36012800 | -0.89590800 | -0.02597600 |
| C | 4.01109100 | -1.09588100 | -0.32049300 |
| C | 3.12032100 | -0.01606900 | -0.37034000 |
| C | 3.61137400 | 1.27051600  | -0.11404300 |
| C | 4.95967500 | 1.47471500  | 0.18085700  |

|                                          |                |             |                             |
|------------------------------------------|----------------|-------------|-----------------------------|
| C                                        | 5.83868900     | 0.39106700  | 0.22604200                  |
| H                                        | 6.03811700     | -1.74465200 | 0.00334700                  |
| H                                        | 3.64414500     | -2.10024500 | -0.51835400                 |
| H                                        | 2.93144000     | 2.11843500  | -0.15020300                 |
| H                                        | 5.32441400     | 2.48033900  | 0.37204600                  |
| H                                        | 6.88945000     | 0.54876500  | 0.45267900                  |
| C                                        | 1.65274100     | -0.24053400 | -0.63832600                 |
| H                                        | 1.22175300     | 0.62660200  | -1.14897100                 |
| H                                        | 1.51303900     | -1.10745400 | -1.29204000                 |
| C                                        | 0.87334700     | -0.47943300 | 0.67755400                  |
| H                                        | 1.29477100     | -1.34588800 | 1.20330700                  |
| H                                        | 1.00730300     | 0.37951900  | 1.34747200                  |
| C                                        | -0.55041100    | -0.70112400 | 0.46699600                  |
| C                                        | -1.73506700    | -0.86495600 | 0.25909500                  |
| S                                        | -3.36017700    | -1.23812000 | -0.01819100                 |
| C                                        | -4.04867900    | 0.46536600  | -0.05112600                 |
| F                                        | -5.36730600    | 0.35187700  | -0.26747100                 |
| F                                        | -3.85737600    | 1.11565700  | 1.10442000                  |
| F                                        | -3.51541300    | 1.21112600  | -1.02802300                 |
| Zero-point correction=                   |                |             | 0.173248 (Hartree/Particle) |
| Thermal correction to Energy=            |                |             | 0.187710                    |
| Thermal correction to Enthalpy=          |                |             | 0.188655                    |
| Thermal correction to Gibbs Free Energy= |                |             | 0.126539                    |
| SCF Done: E(RM062X) =                    | -1122.22067822 |             |                             |

### TS2'

|   |            |             |            |
|---|------------|-------------|------------|
| C | 3.05794800 | -1.19619400 | 2.25103200 |
| C | 2.49839800 | -1.74559200 | 3.40575400 |
| C | 1.11588800 | -1.84857200 | 3.53609000 |
| C | 0.28525500 | -1.40490200 | 2.50249100 |
| C | 0.88942200 | -0.87474800 | 1.36581300 |
| C | 2.24878300 | -0.74135700 | 1.20053100 |
| H | 4.13351800 | -1.12024500 | 2.14156500 |
| H | 3.14336400 | -2.09621300 | 4.20487900 |
| H | 0.65091500 | -2.27656100 | 4.41929300 |

|   |             |             |             |
|---|-------------|-------------|-------------|
| H | 2.69184500  | -0.30872200 | 0.31794500  |
| I | -0.54611600 | -0.37527600 | -0.19121700 |
| C | -1.18080200 | -1.57210100 | 2.58350800  |
| O | -1.74952400 | -2.17003100 | 3.48918600  |
| N | -1.83457000 | -1.00222700 | 1.49873500  |
| C | -3.12093900 | -1.23448500 | 1.07392900  |
| C | -4.13973600 | -1.77981300 | 2.02659400  |
| H | -3.91427900 | -2.83405000 | 2.22032300  |
| H | -4.09516600 | -1.26016100 | 2.98538100  |
| H | -5.12798500 | -1.68330400 | 1.57561800  |
| O | -3.37236300 | -0.96829200 | -0.11049200 |
| C | -1.88565600 | -3.96088300 | -0.36031400 |
| C | -1.36201000 | -3.56810500 | -1.59153600 |
| C | 0.02070600  | -3.42459800 | -1.77564100 |
| C | 0.87086700  | -3.69950200 | -0.69674200 |
| C | 0.34842300  | -4.08618400 | 0.53941900  |
| C | -1.03055400 | -4.21406300 | 0.71595700  |
| H | -2.96174100 | -4.04840700 | -0.23805600 |
| H | -2.03603000 | -3.34101000 | -2.41367000 |
| H | 1.94523900  | -3.58516800 | -0.79818300 |
| H | 1.02282600  | -4.27033900 | 1.37062100  |
| H | -1.43293200 | -4.49217100 | 1.68635100  |
| C | 0.54021500  | -2.95138700 | -3.11616200 |
| H | 0.79496500  | -3.81303600 | -3.74521600 |
| H | -0.24933200 | -2.40435600 | -3.63988300 |
| C | 1.81890000  | -2.07646700 | -3.07234800 |
| H | 2.66399400  | -2.61755000 | -2.64310100 |
| H | 2.09341200  | -1.82585000 | -4.10444100 |
| C | 1.66195200  | -0.82089600 | -2.36685800 |
| C | 1.34615200  | 0.20368600  | -1.74348000 |
| H | 1.62601400  | 1.21050400  | -1.47515800 |
| S | 4.78098600  | -0.19870800 | -2.61259400 |
| C | 5.13027000  | -1.24332200 | -1.22552600 |
| F | 5.39278600  | -0.55879900 | -0.06446000 |
| F | 4.10362700  | -2.09845000 | -0.88278100 |

|                                          |                |             |                             |
|------------------------------------------|----------------|-------------|-----------------------------|
| F                                        | 6.20668800     | -2.06026600 | -1.40467200                 |
| C                                        | -6.49510700    | 1.75821200  | -1.66087000                 |
| C                                        | -5.53460500    | 1.13871400  | -0.64810800                 |
| C                                        | -5.62983600    | 1.78142200  | 0.73789200                  |
| H                                        | -4.51507500    | 1.30366600  | -1.01505700                 |
| O                                        | -5.86793400    | -0.22256900 | -0.54811700                 |
| H                                        | -5.01985800    | -0.72143600 | -0.53184400                 |
| F                                        | -4.69058000    | 1.24897100  | 1.55440600                  |
| F                                        | -6.82779500    | 1.56315000  | 1.30841000                  |
| F                                        | -5.42140600    | 3.11169100  | 0.69986800                  |
| F                                        | -6.26991100    | 3.07522700  | -1.83378500                 |
| F                                        | -6.34263300    | 1.15363900  | -2.85429400                 |
| F                                        | -7.78029300    | 1.60378200  | -1.28683900                 |
| C                                        | 3.49770900     | 4.02980900  | -0.42853200                 |
| C                                        | 4.16519500     | 2.72720800  | 0.01643500                  |
| C                                        | 4.13423000     | 2.53118300  | 1.53301000                  |
| H                                        | 5.21602400     | 2.77033000  | -0.28985100                 |
| O                                        | 3.46427100     | 1.66748600  | -0.55891700                 |
| H                                        | 3.99384000     | 1.22300600  | -1.27834600                 |
| F                                        | 4.84353800     | 1.43653100  | 1.86864800                  |
| F                                        | 2.87604900     | 2.35236600  | 1.98549800                  |
| F                                        | 4.66336200     | 3.58134800  | 2.19045900                  |
| F                                        | 4.11197600     | 5.12070400  | 0.06628800                  |
| F                                        | 3.52838400     | 4.11029200  | -1.77302700                 |
| F                                        | 2.20229500     | 4.07764000  | -0.05056500                 |
| Zero-point correction=                   |                |             | 0.453753 (Hartree/Particle) |
| Thermal correction to Energy=            |                |             | 0.502617                    |
| Thermal correction to Enthalpy=          |                |             | 0.503561                    |
| Thermal correction to Gibbs Free Energy= |                |             | 0.361621                    |
| SCF Done: E(RM062X) =                    | -3552.44147326 |             |                             |

## References

- [1] J. Zhu, C. Xu, C. Xu and Q. Shen, Preparation of N-Trifluoromethylthiosaccharin: A Shelf-Stable Electrophilic Reagent for Trifluoromethylthiolation, *Org. Synth.*, **2017**, *94*, 217–223.
- [2] S. Alazet, L. Zimmer and T. Billard, Base-Catalyzed Electrophilic

- Trifluoromethylthiolation of Terminal Alkynes, *Angew. Chem. Int. Ed.*, **2013**, *52*, 10814-10817.
- [3] G. He, Y. H. Jiang, X. Xiao, J. H. Lin, X. Zheng, R. B. Du, Y. C. Cao and J. C. Xiao, Difluorocarbene-Based Trifluoromethylthiolation of Terminal Alkynes, *J. Fluor. Chem.*, **2020**, *230*, 109437-106442.
- [4] S. Q. Zhu, X. H. Xu and F. L. Qing, Oxidative Trifluoromethylthiolation of Terminal Alkynes with AgSCF<sub>3</sub>: A Convenient Approach to Alkynyl Trifluoromethyl Sulfides, *Eur. J. Org. Chem.*, **2014**, 4453-4456.
- [5] C. Chen, L. L. Chu and F. L. Qing, Metal-Free Oxidative Trifluoromethylthiolation of Terminal Alkynes with CF<sub>3</sub>SiMe<sub>3</sub> and Elemental Sulfur, *J. Am. Chem. Soc.*, **2012**, *134*, 12454-12457.
- [6] X. Shao, C. Xu, L. Lu and Q. Shen, Structure-Reactivity Relationship of Trifluoromethanesulfenates: Discovery of an Electrophilic Trifluoromethylthiolating Reagent, *J. Org. Chem.*, **2015**, *80*, 3012-3021.
- [7] A. Tlili, S. Alazet, Q. Glenadel, T. Billard, Copper-Catalyzed Perfluoroalkylthiolation of Alkynes with Perfluoroalkanesulfenamides, *Chem. Eur. J.*, **2016**, *22*, 10230-10234.
- [8] R. Pluta, P. Nikolaienko, and M. Rueping, Direct Catalytic Trifluoromethylthiolation of Boronic Acids and Alkynes Employing Electrophilic Shelf-Stable N-(trifluoromethylthio)phthalimide, *Angew. Chem. Int. Ed.*, **2014**, *53*, 1650-1653.
- [9] N. Walker, W. B. Fox, R. A. De Marco, and W. B. Moniz, Carbon-13 NMR Spectra: Halocarbons vs Hydrocarbons, *Journal of Magnetic Resonance (1969)*, **1979**, *34*, 295-299.
- [10] X. G. Yang, F. H. Du, J. J. Li and C. Zhang, Late-Stage Dehydroxyazidation of Alcohols Promoted by Trifunctional Hypervalent Azido-Iodine(III) Reagents, *Chem. Eur. J.*, **2022**, *28*, e202200272 (1 of 7).
- [11] S. Ding, G. Jia and J. Sun, Iridium-Catalyzed Intermolecular Azide-Alkyne Cycloaddition of Internal Thioalkynes under Mild Conditions, *Angew. Chem. Int. Ed.*, **2014**, *53*, 1877-1880.
- [12] Gaussian 16, Revision A.03, M. J. Frisch, G. W. Trucks, H. B. Schlegel, G. E. Scuseria, M. A. Robb, J. R. Cheeseman, G. Scalmani, V. Barone, G. A. Petersson, H. Nakatsuji, X. Li, M. Caricato, A. V. Marenich, J. Bloino, B. G. Janesko, R. Gomperts, B. Mennucci, H. P. Hratchian, J. V. Ortiz, A. F. Izmaylov, J. L. Sonnenberg, D. Williams-Young, F. Ding, F. Lipparini, F. Egidi, J. Goings, B. Peng, A. Petrone, T. Henderson, D. Ranasinghe, V. G. Zakrzewski, J. Gao, N.

- Rega, G. Zheng, W. Liang, M. Hada, M. Ehara, K. Toyota, R. Fukuda, J. Hasegawa, M. Ishida, T. Nakajima, Y. Honda, O. Kitao, H. Nakai, T. Vreven, K. Throssell, J. A. Montgomery, J. E. Peralta, F. Ogliaro, M. J. Bearpark, J. J. Heyd, E. N. Brothers, K. N. Kudin, V. N. Staroverov, T. A. Keith, R. Kobayashi, J. Normand, K. Raghavachari, A. P. Rendell, J. C. Burant, S. S. Iyengar, J. Tomasi, M. Cossi, J. M. Millam, M. Klene, C. Adamo, R. Cammi, J. W. Ochterski, R. L. Martin, K. Morokuma, O. Farkas, J. B. Foresman and D. J. Fox, Gaussian, Inc., Wallingford CT, 2016.
- [13] P. J. Stephens, F. J. Devlin, C. F. Chabalowski and M. J. Frisch, Ab Initio Calculation of Vibrational Absorption and Circular Dichroism Spectra Using Density Functional Force Fields, *J. Phys. Chem.*, **1994**, *98*, 11623-11627.
- [14] (a) S. Grimme, J. Antony, S. Ehrlich and H. Krieg, A consistent and accurate ab initio parametrization of density functional dispersion correction (DFT-D) for the 94 elements H-Pu, *J. Chem. Phys.*, **2010**, *132*, 154104; (b) S. Grimme, S. Ehrlich and L. Goerigk, Effect of the damping function in dispersion corrected density functional theory, *J. Comput. Chem.*, **2011**, *32*, 1456-1465.
- [15] (a) G. Igel-Mann, H. Stoll and H. Preuss, Pseudopotentials for main group elements (IIIa through VIIa), *Mol. Phys.*, **1988**, *65*, 1321-1328; (b) D. Andrae, U. Häußermann, M. Dolg, H. Stoll and H. Preuß, Energy-adjusted ab initio pseudopotentials for the second and third row transition elements, *Theor. Chim. Acta.*, **1990**, *77*, 123-141.
- [16] P. C. Hariharan and J. A. Pople, The influence of polarization functions on molecular orbital hydrogenation energies, *Theor. Chim. Acta.*, **1973**, *28*, 213-222.
- [17] A. V. Marenich, C. J. Cramer and D. G. Truhlar, Universal Solvation Model Based on Solute Electron Density and on a Continuum Model of the Solvent Defined by the Bulk Dielectric Constant and Atomic Surface Tensions, *J. Phys. Chem. B*, **2009**, *113*, 6378-6396.
- [18] X. Zhang and R. S. Paton, Stereoretention in styrene heterodimerisation promoted by one-electron oxidants, *Chem. Sci.*, **2020**, *11*, 9309-9324.
- [19] (a) L. Ebersson, M. Hartshorn, O. Persson and F. Radner, Making radical cations



- live longer, *Chem. Commun.*, **1996**, *18*, 2105-2112;(b) X. Gu, X. Song, C. Shao, P. Zeng, X. Lu, X. Shen and Q. Yang, Electrospinning of poly(butylene-carbonate): Effect of Solvents on the Properties of the Nanofibers Film, *Int. J. Electrochem. Sci.*, **2014**, *9*, 8045-8056;(c) M. Carraro, M. Gardan, A. Sartorel, C. Maccato and M. Bonchio, Hydrogen peroxide activation by fluorophilic polyoxotungstates for fast and selective oxygen transfer catalysis, *Dalton Trans.*, **2016**, *45*, 14544-14548.
- [20] Sigma-Aldrich, 1,1,1,3,3,3-Hexafluoro-2-propanol.
- [21] (a) R. C. Weast, *CRC Handbook of Chemistry and Physics*, 76<sup>th</sup>, ed.; CRC Press: Boca Raton, FL, 1995;(b) E. Richmond, J. Yi, V. D. Vuković, F. Sajadi, C. N. Rowley and J. Moran, Ring-opening hydroarylation of monosubstituted cyclopropanes enabled by hexafluoroisopropanol, *Chem. Sci.*, **2018**, *9*, 6411-6416.
- [22] E. Engelage, N. Schulz, F. Heinen, S. M. Huber, D. G. Truhlar and C. J. Cramer, Refined SMD Parameters for Bromine and Iodine Accurately Model Halogen-Bonding Interactions in Solution, *Chem. Eur. J.*, **2018**, *24*, 15983-15987.
- [23] (a) K. Fukui, The path of chemical reactions - the IRC approach, *Acc. Chem. Res.*, **1981**, *14*, 363-368;(b) K. Fukui, Formulation of the reaction coordinate, *J. Phys. Chem.*, **1970**, *74*, 4161-4163.
- [24] (a) Y. Zhao and D. G. Truhlar, The M06 suite of density functionals for main group thermochemistry, thermochemical kinetics, noncovalent interactions, excited states, and transition elements: two new functionals and systematic testing of four M06-class functionals and 12 other functionals, *Theor. Chim. Acta.*, **2008**, *120*, 215-241;(b) A. D. McLean and G. S. Chandler, Contracted Gaussian basis sets for molecular calculations. I. Second row atoms, Z=11-18, *J. Chem. Phys.*, **1980**, *72*, 5639-5648;(c) R. Krishnan, J. S. Binkley, R. Seeger and J. A. Pople, Self-consistent molecular orbital methods. XX. A basis set for correlated wave functions, *J. Chem. Phys.*, **1980**, *72*, 650-654;(d) G. A. Petersson, A. Bennett, T. G. Tensfeldt, M. A. Al-Laham and W. A. Shirley, A complete basis set model chemistry. I. The total energies of closed-shell atoms and hydrides of the first-row

elements, *J. Chem. Phys.*, **1988**, *89*, 2193-2218;(e) M. J. Frisch, J. A. Pople and J. S. Binkley, Self-consistent molecular orbital methods 25. Supplementary functions for Gaussian basis sets, *J. Chem. Phys.*, **1984**, *80*, 3265-3269;(f) F. Weigend and R. Ahlrichs, Balanced basis sets of split valence, triple zeta valence and quadruple zeta valence quality for H to Rn: Design and assessment of accuracy, *Phys. Chem. Chem. Phys.*, **2005**, *7*, 3297-3305;(g) T.-Y. Sun, K. Chen, H. Zhou, T. You, P. Yin and X. Wang, Revisiting the effect of f-functions in predicting the right reaction mechanism for hypervalent iodine reagents, *J. Comput. Chem.*, **2021**, *42*, 470-474.

[25] CYLview, 1.0b; C. Y. Legault, Université de Sherbrooke: Quebec, Canada, **2009** (<http://www.cylview.org>).

[26] (a) B. Wang, C. Rong, P. K. Chattaraj and S. Liu, A comparative study to predict regioselectivity, electrophilicity and nucleophilicity with Fukui function and Hirshfeld charge, *Theor. Chem. Acc.*, **2019**, *138*: 124;(b) T. Lu, Q. Chen, in *Conceptual Density Functional Theory: Towards a New Chemical Reactivity Theory*, Vol. 2 (Ed: S. Liu,), WILEY-VCH, Weinheim, Germany **2022**, Ch. 31;(c) T. Lu and Q. Chen, Independent gradient model based on Hirshfeld partition: A new method for visual study of interactions in chemical systems, *J. Comput. Chem.*, **2022**, *43*, 539-555.

# NMR Spectra of Corresponding Compounds

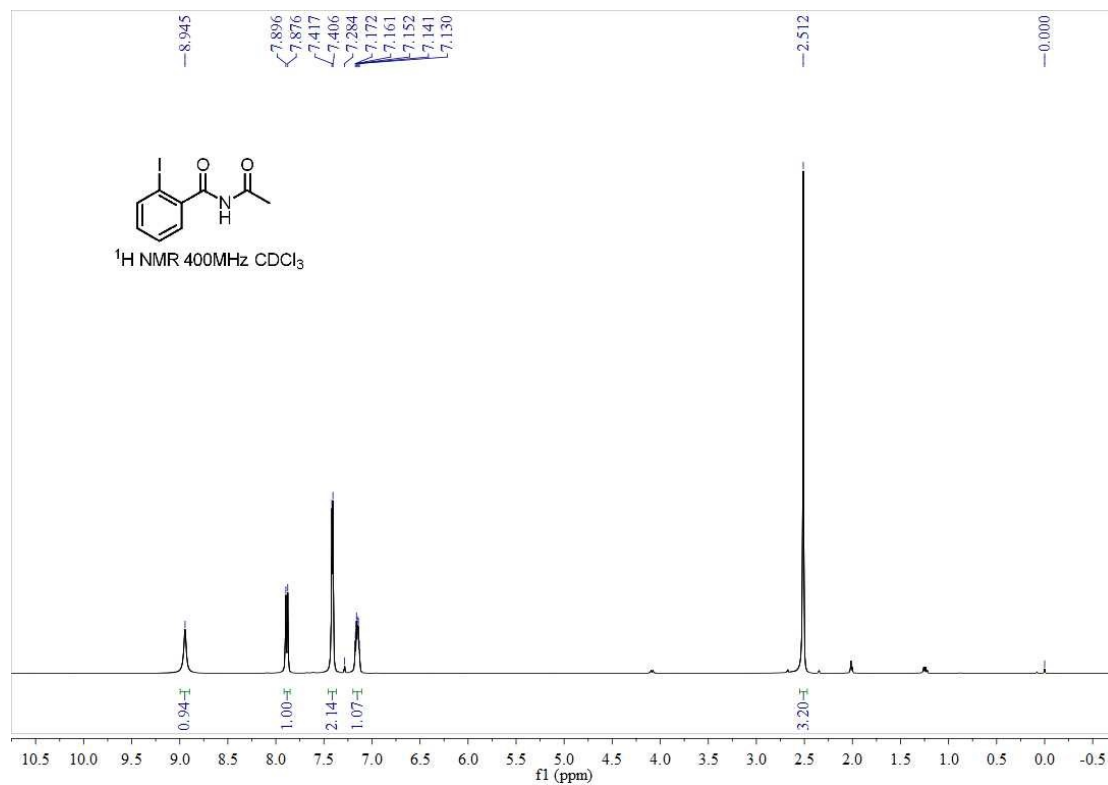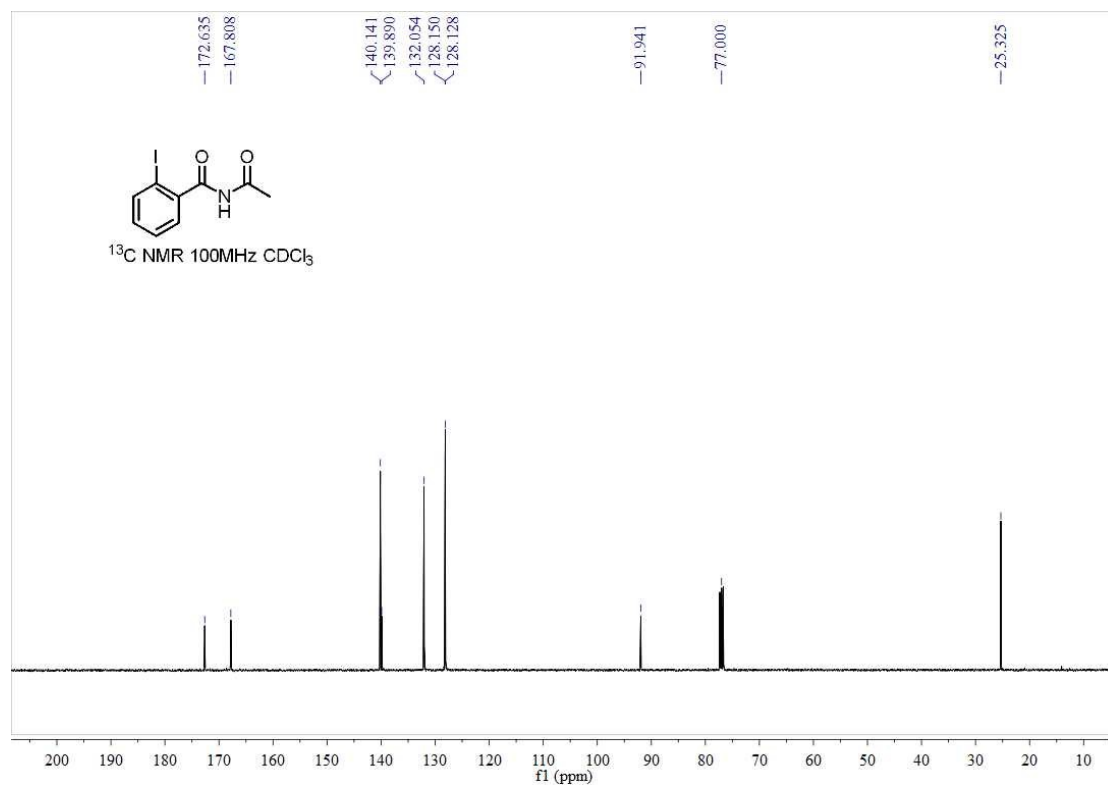

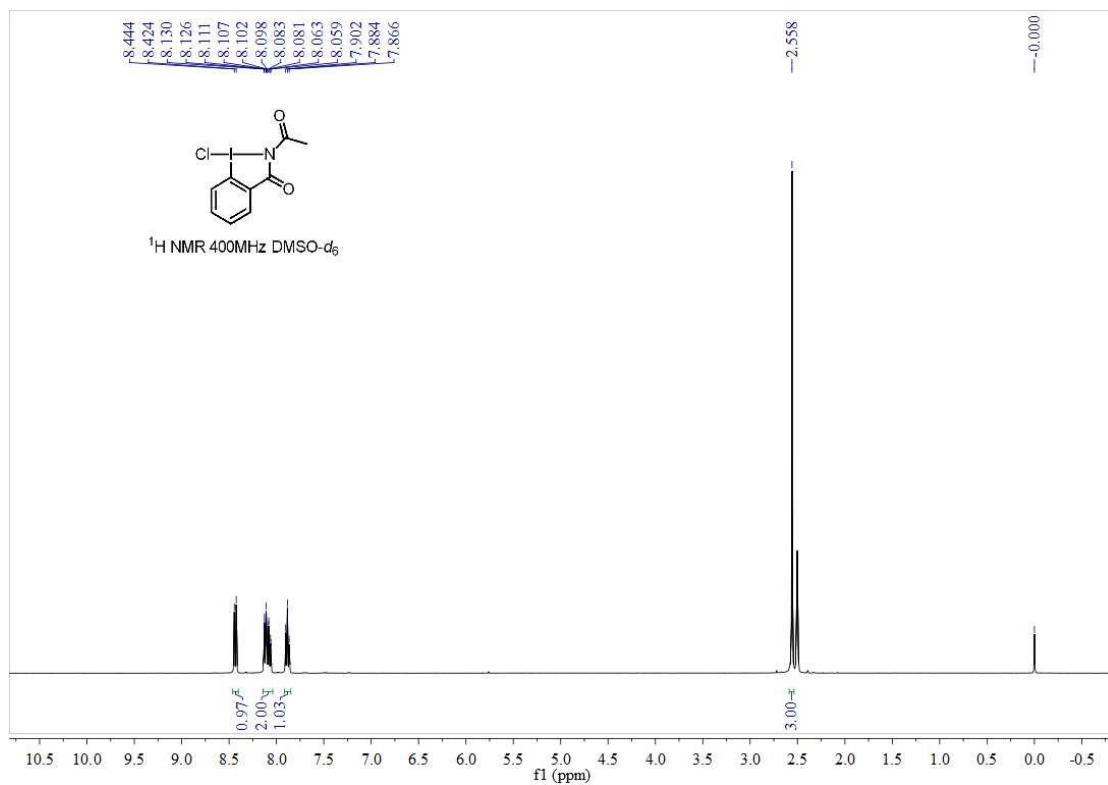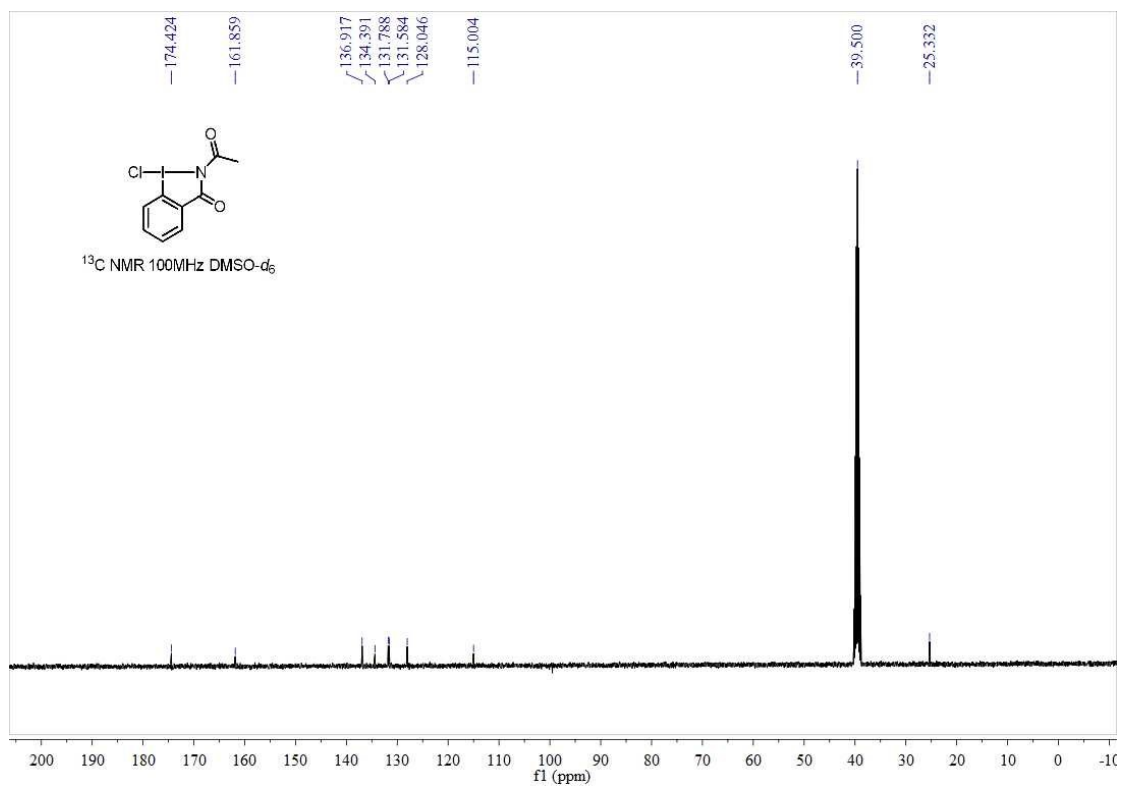

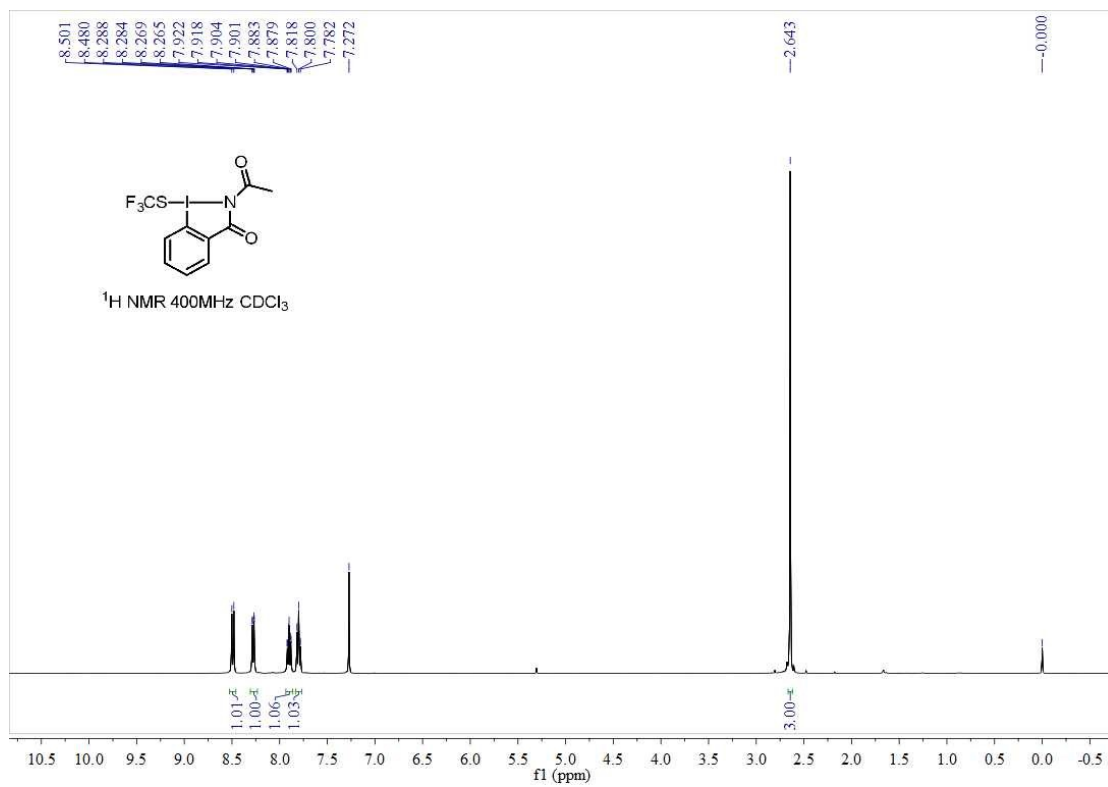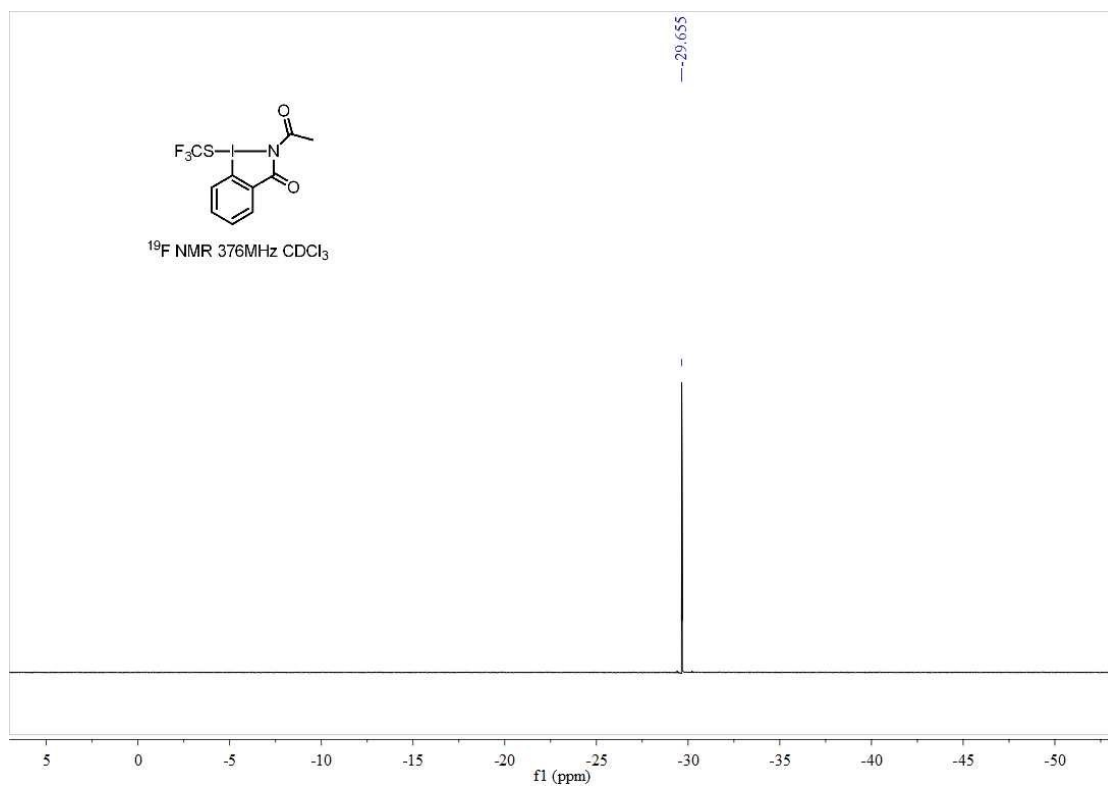

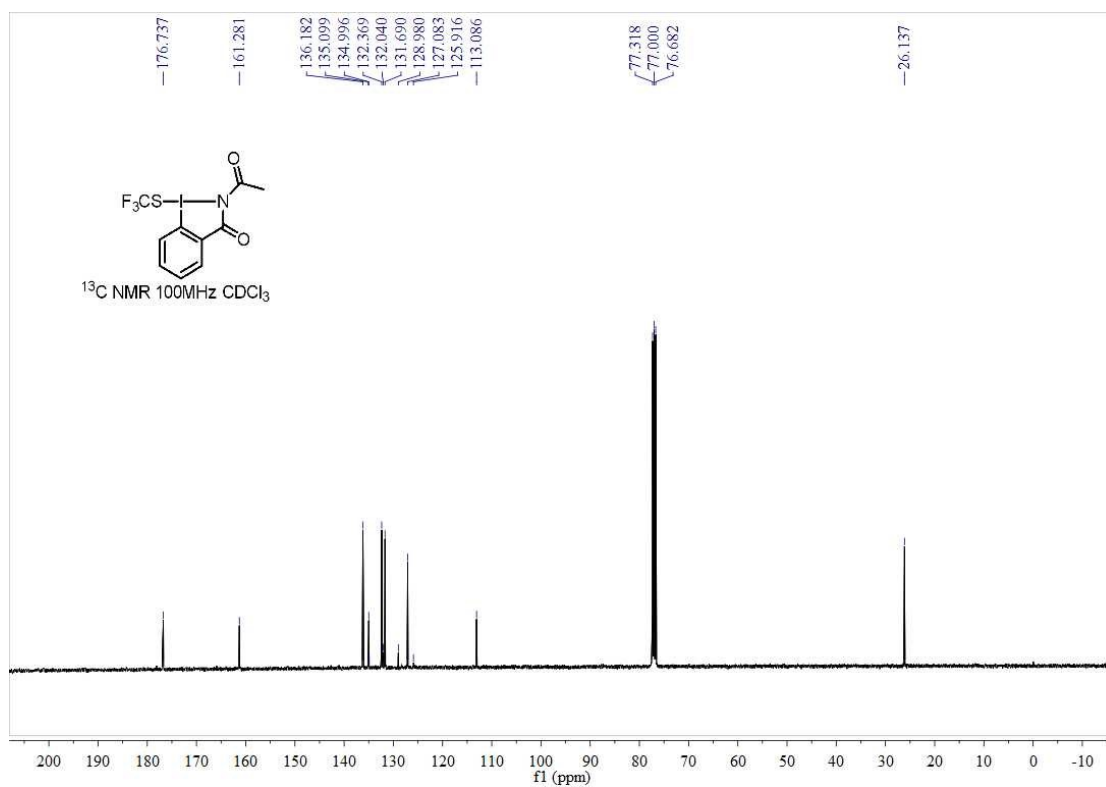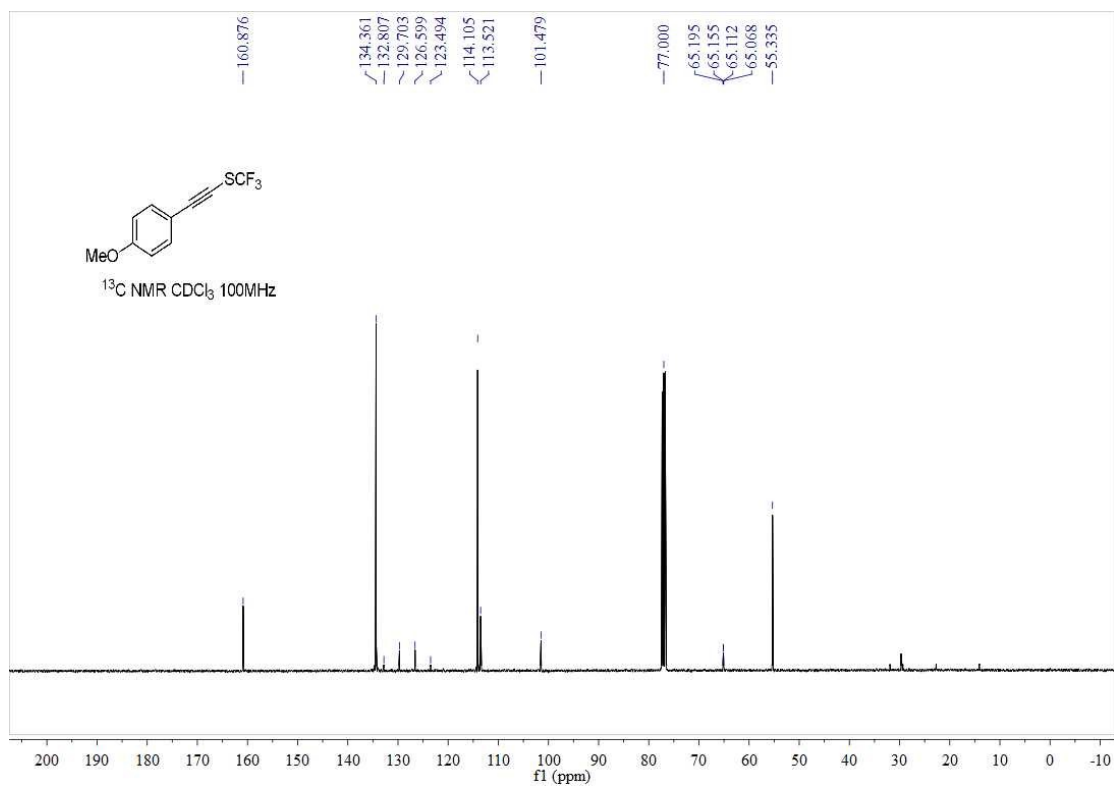

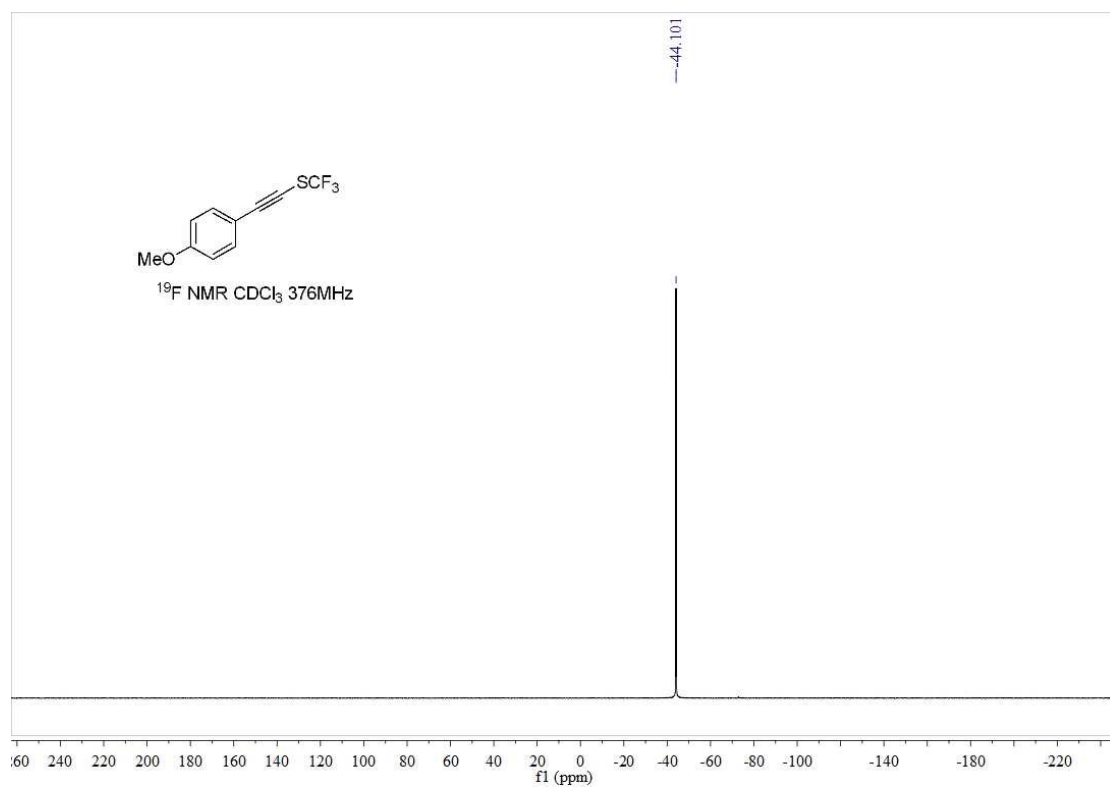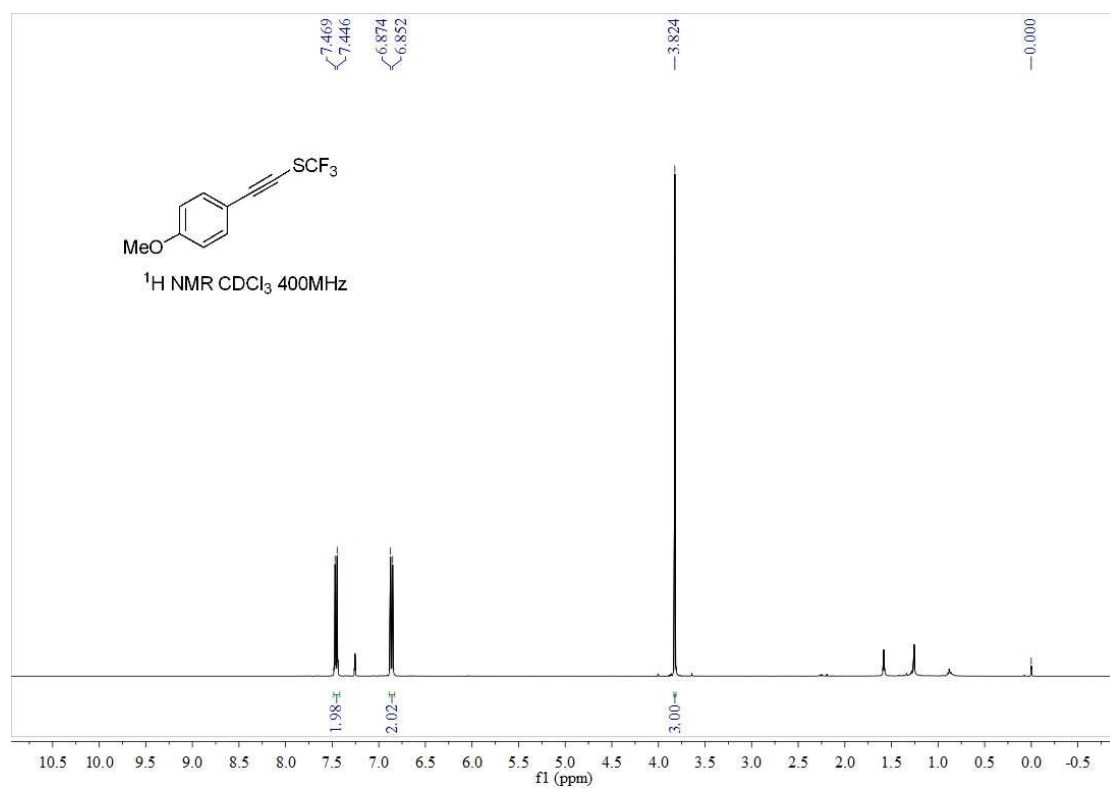

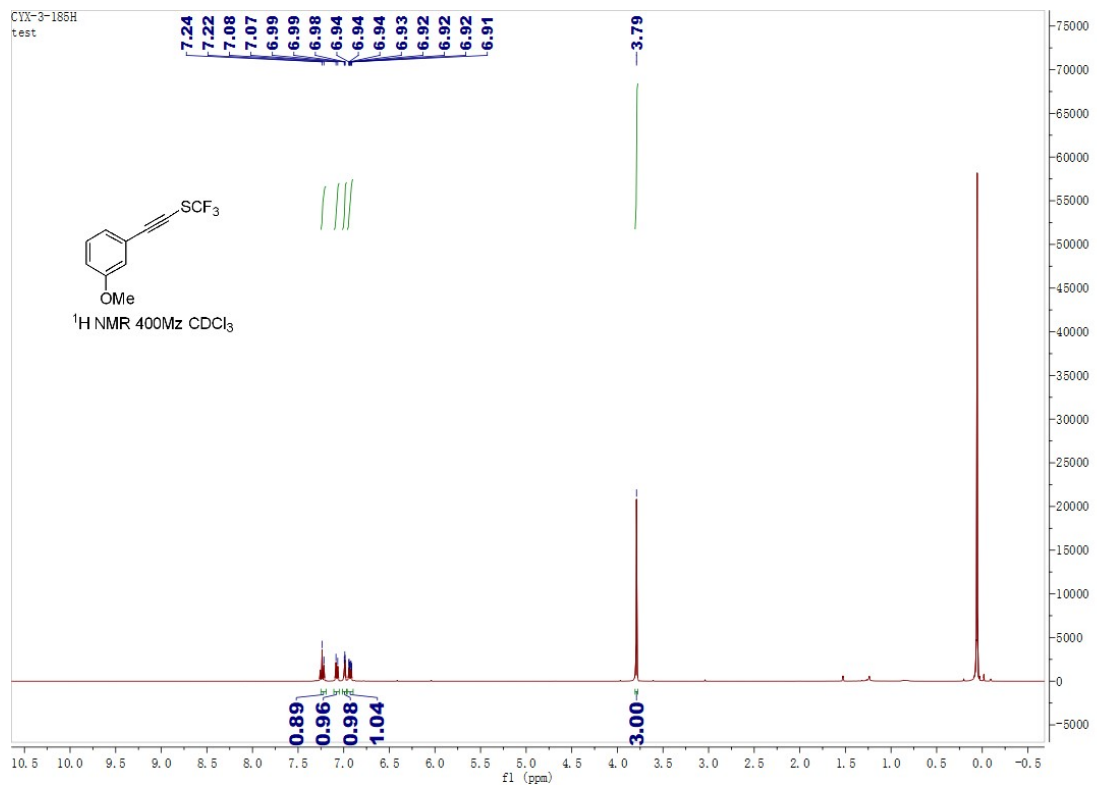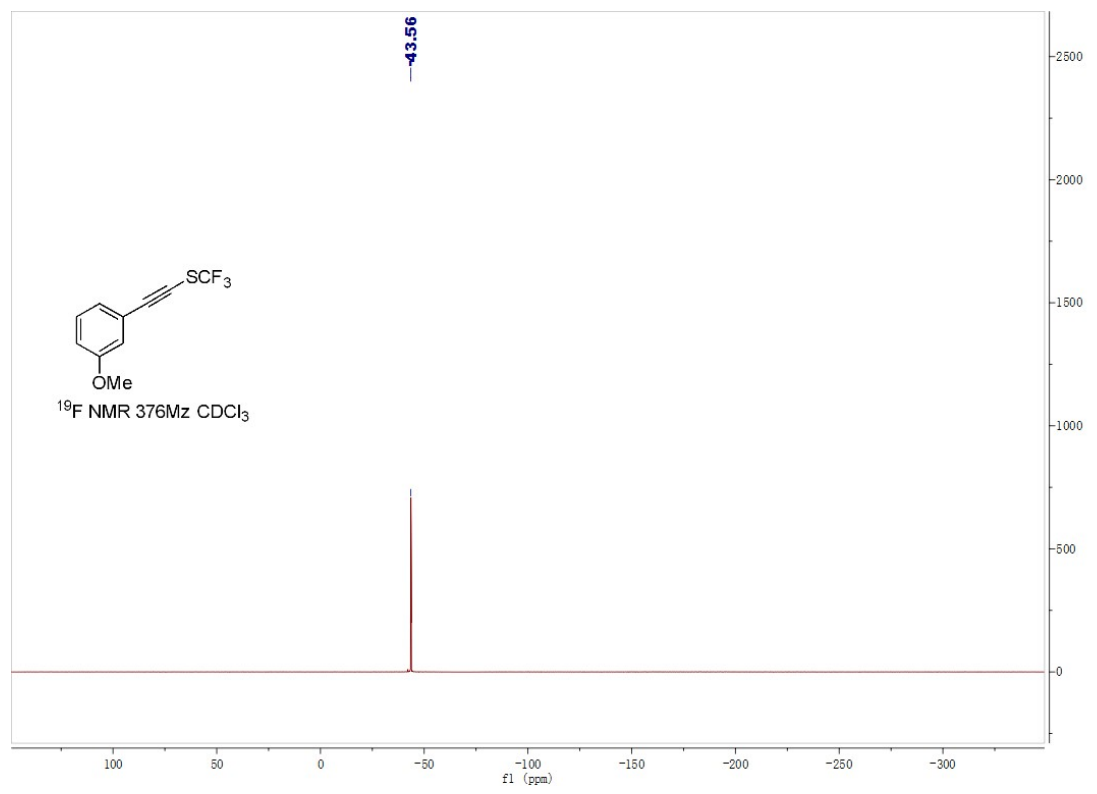



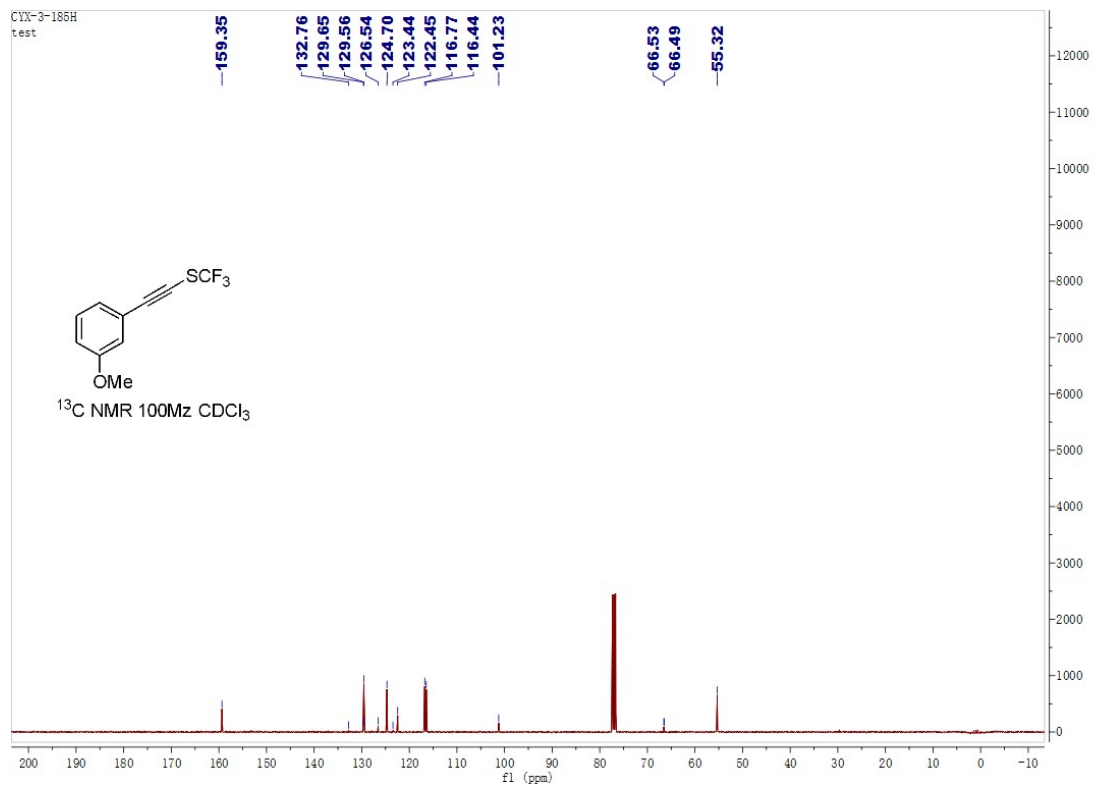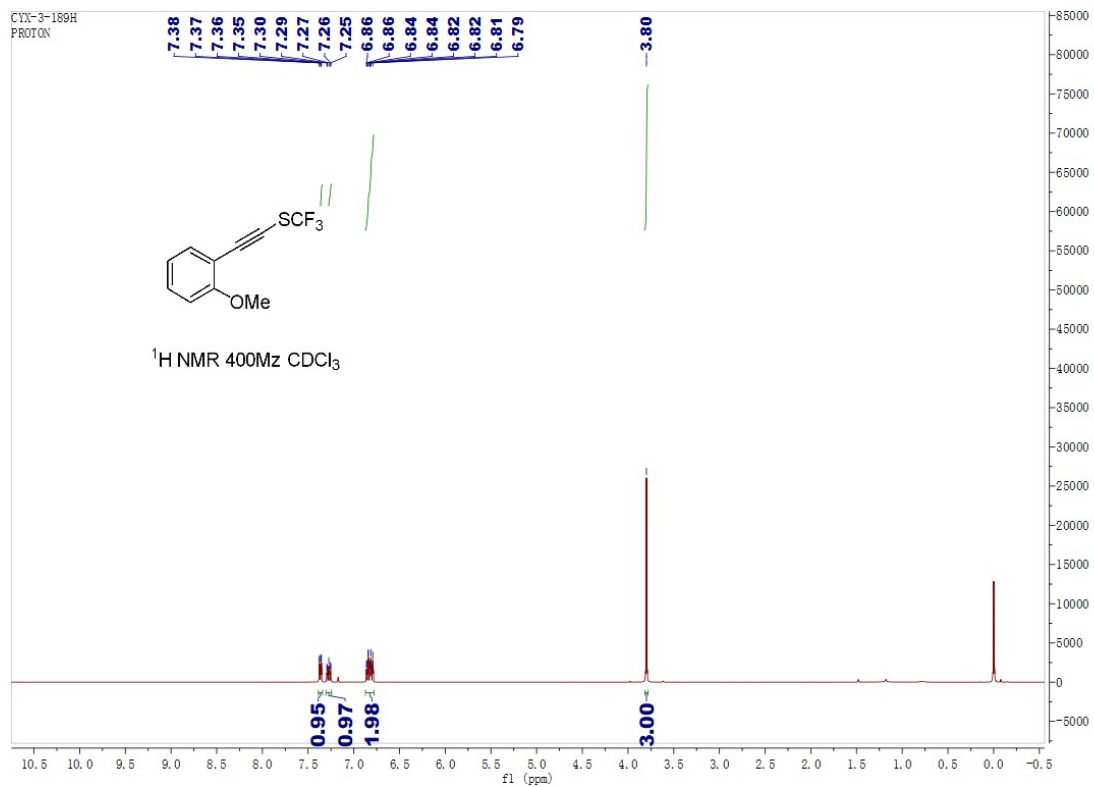

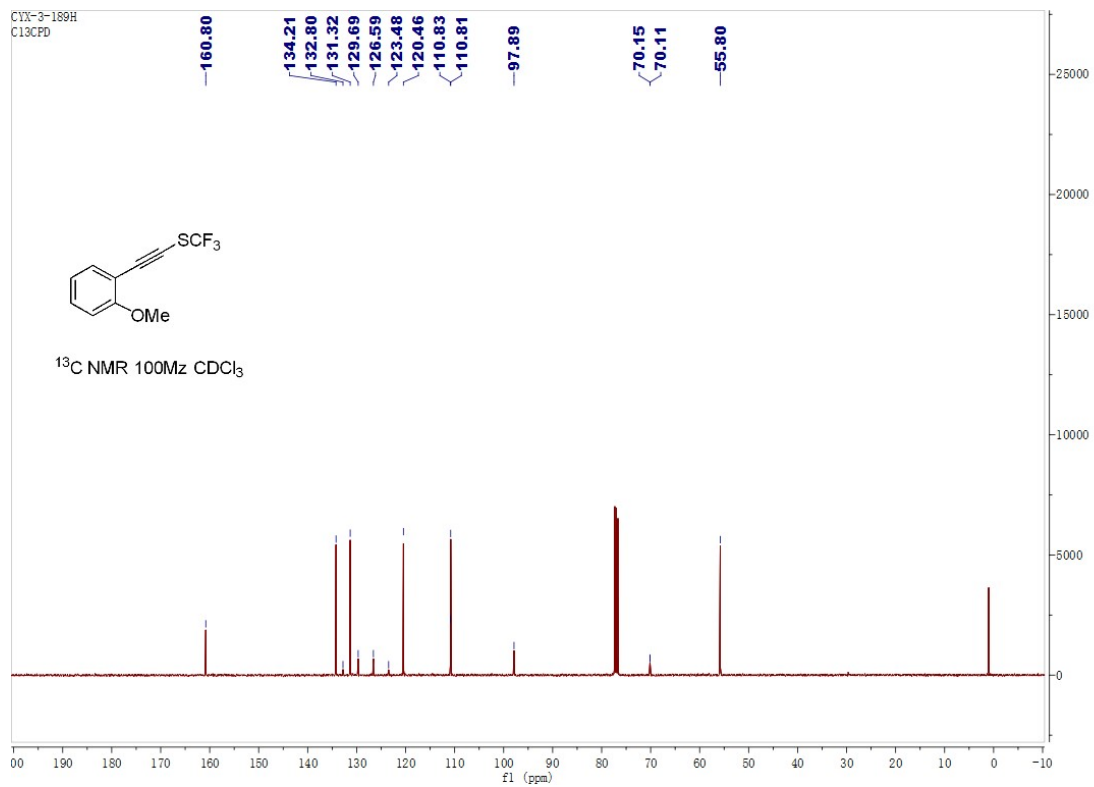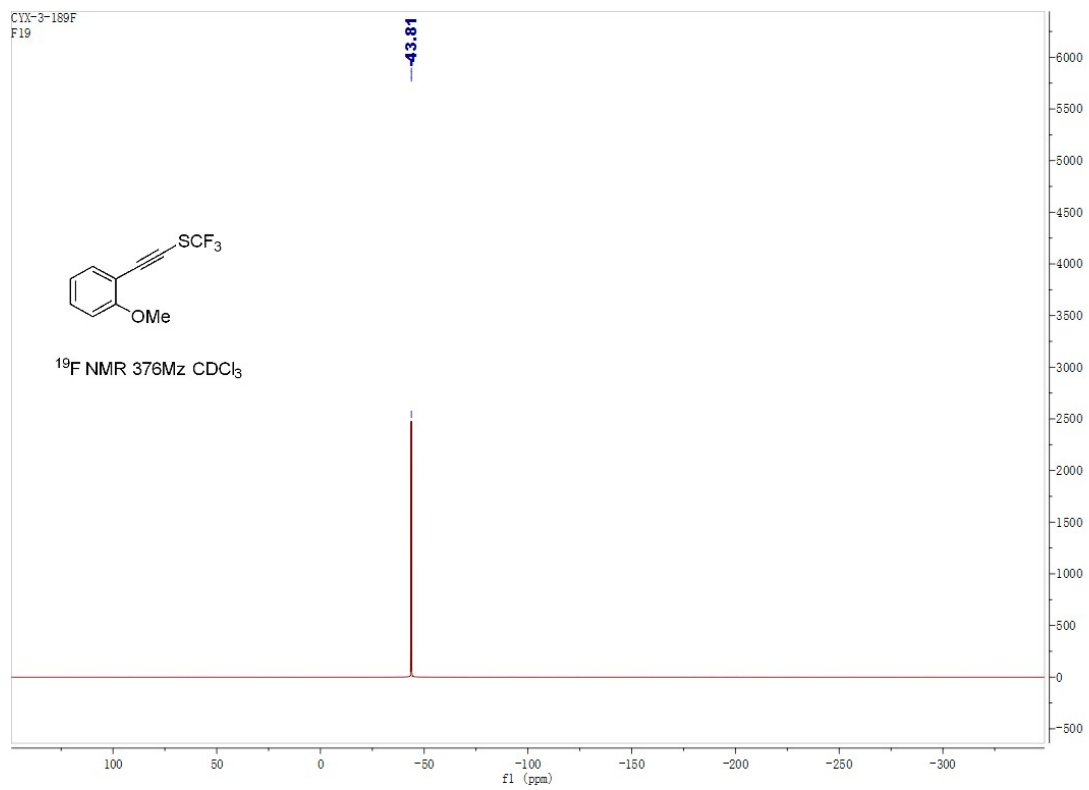

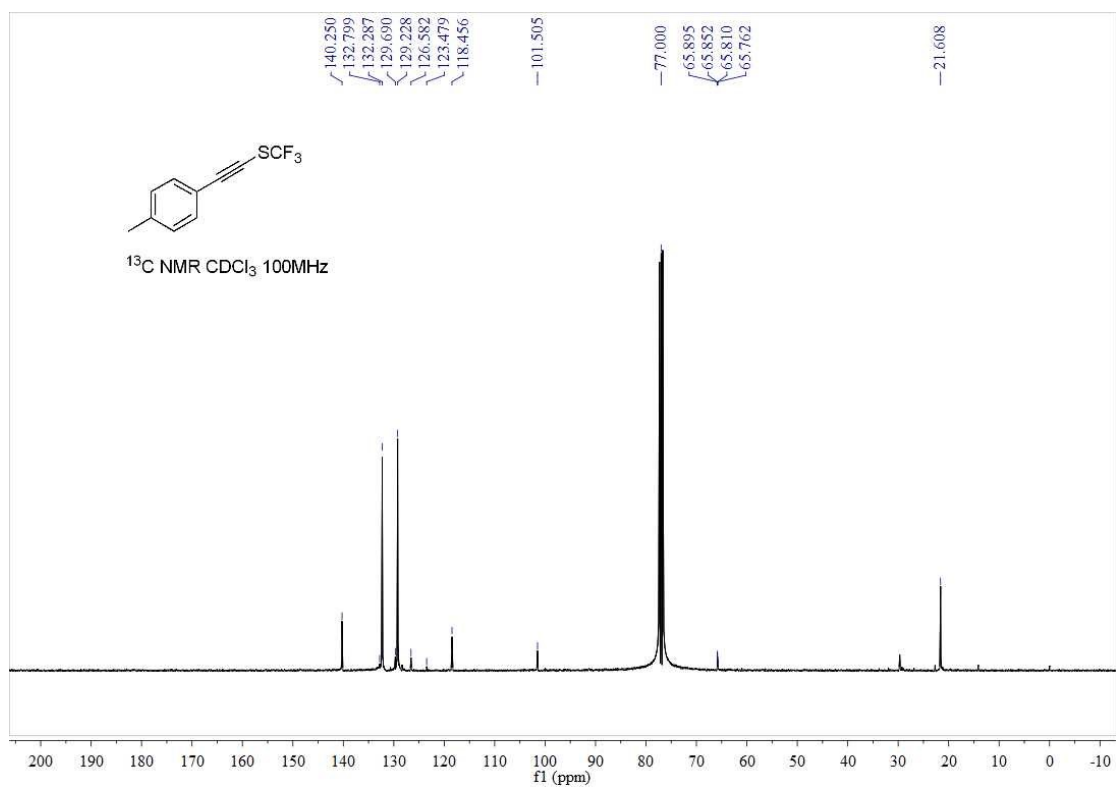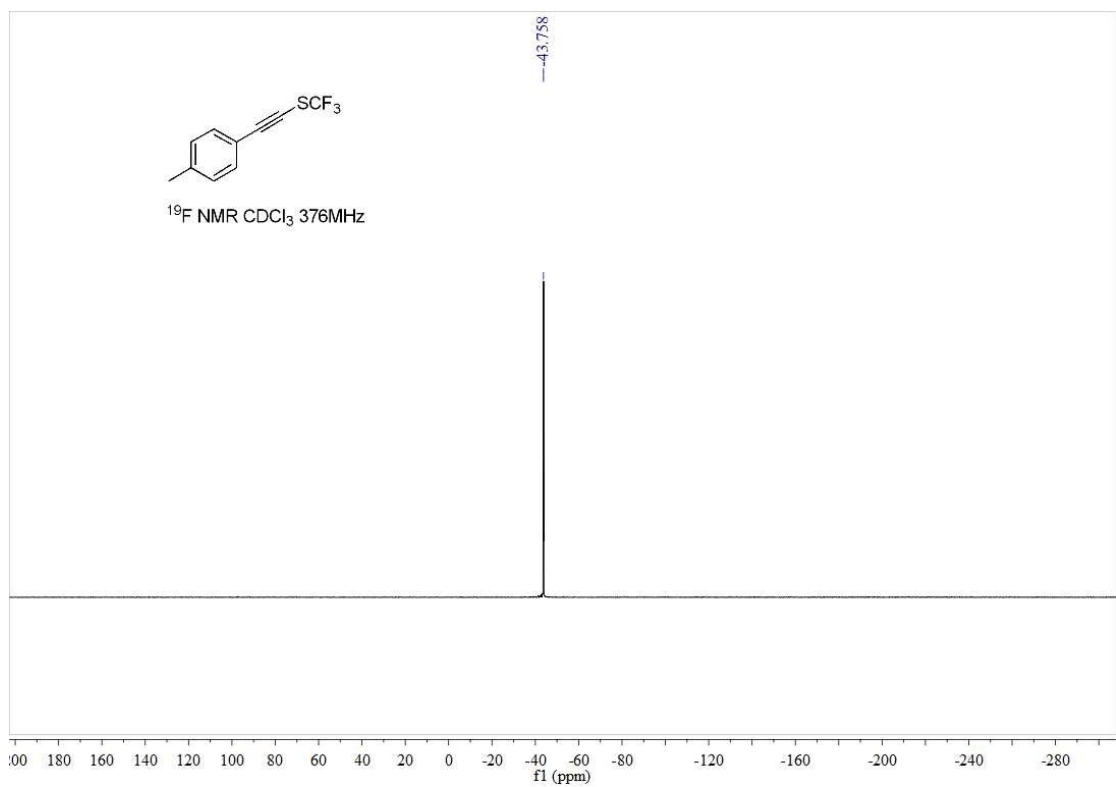

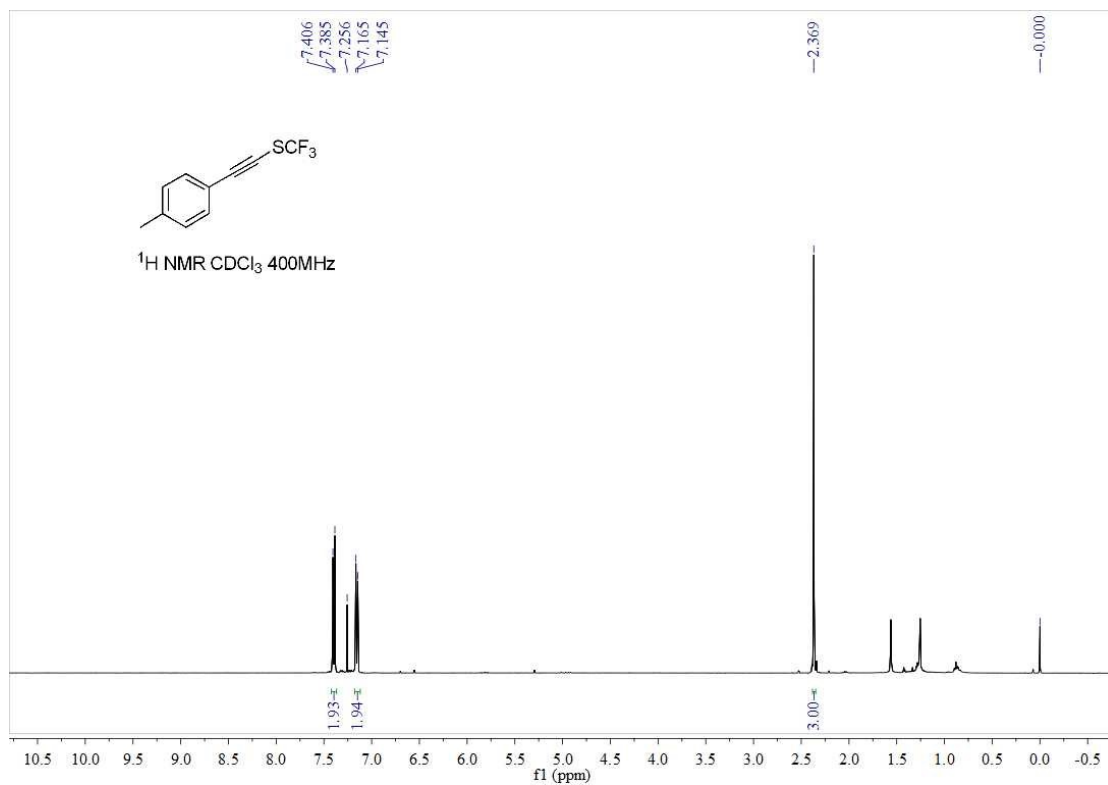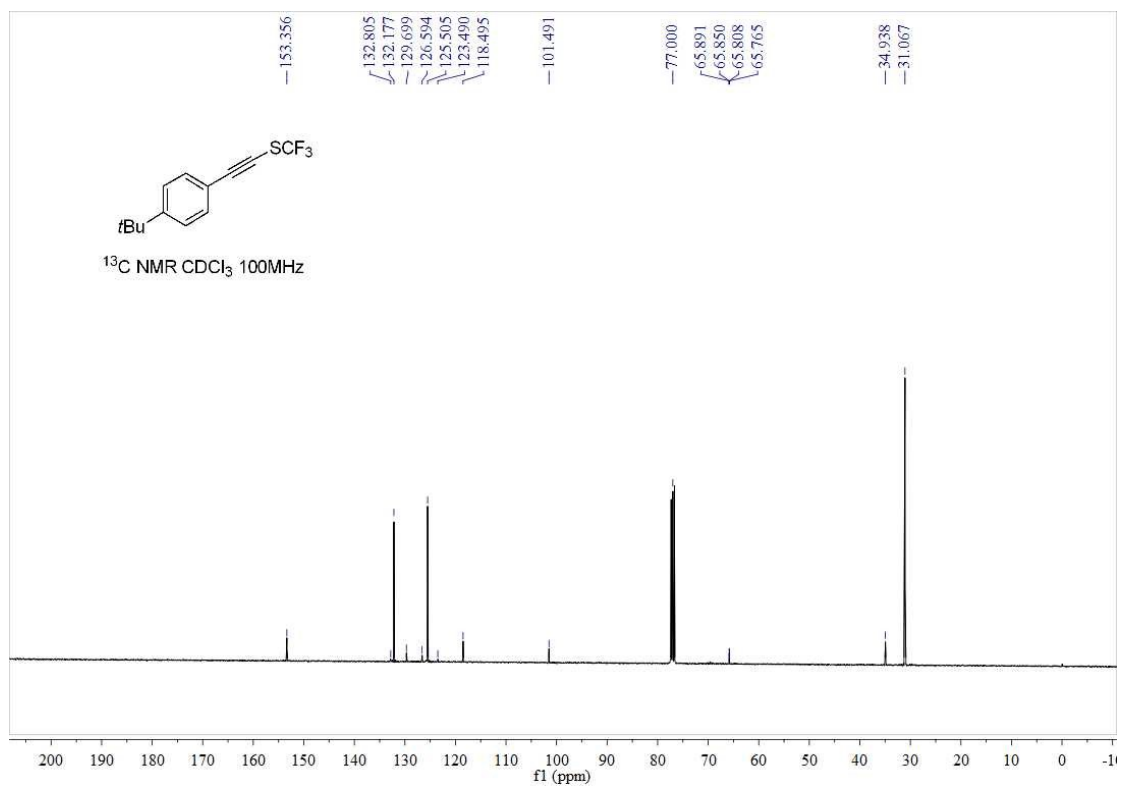

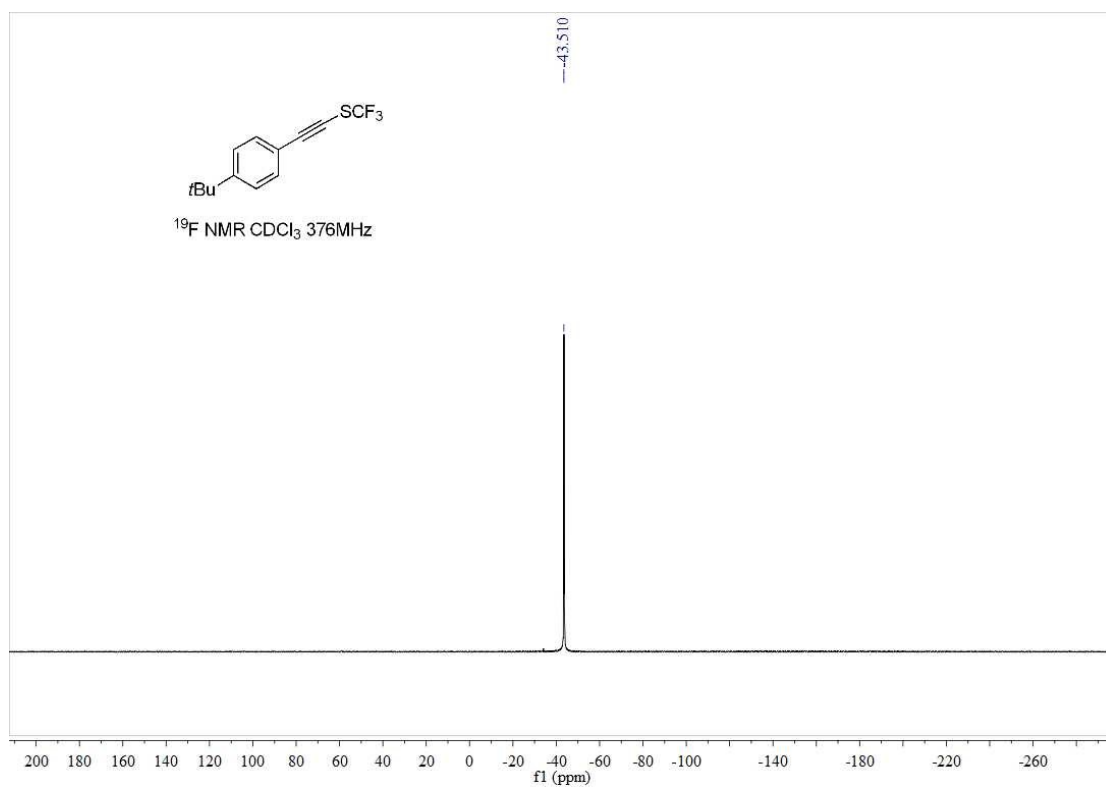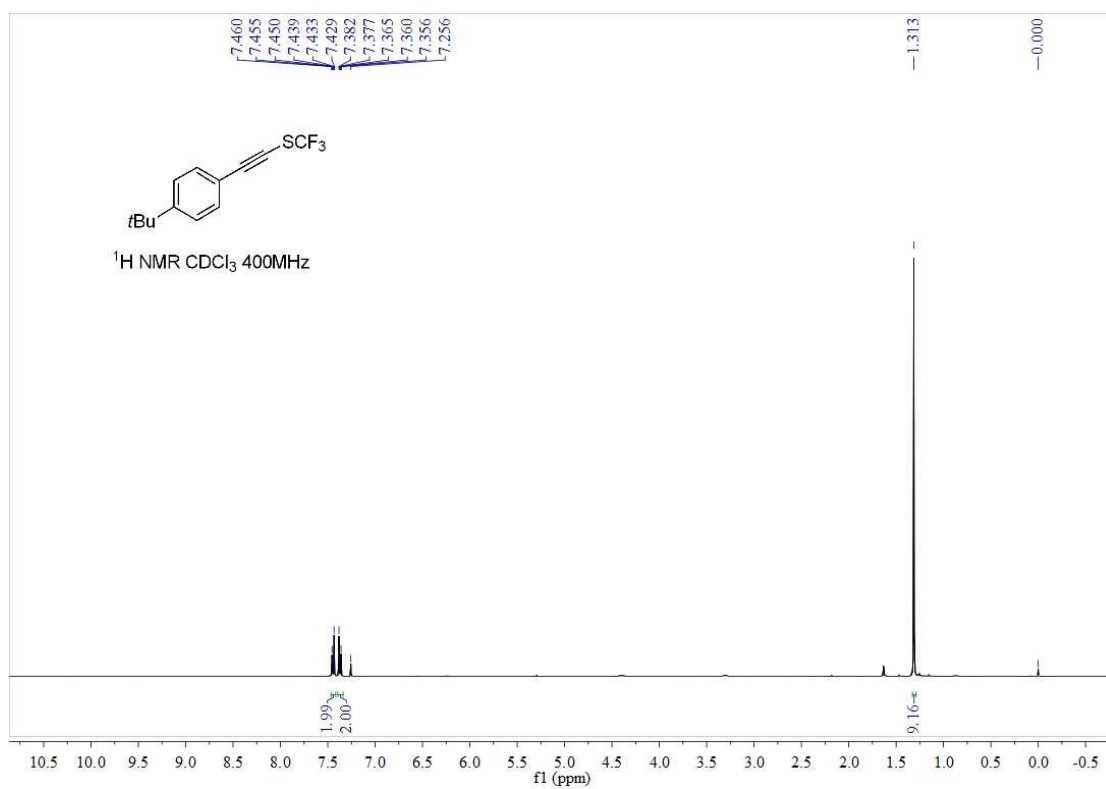

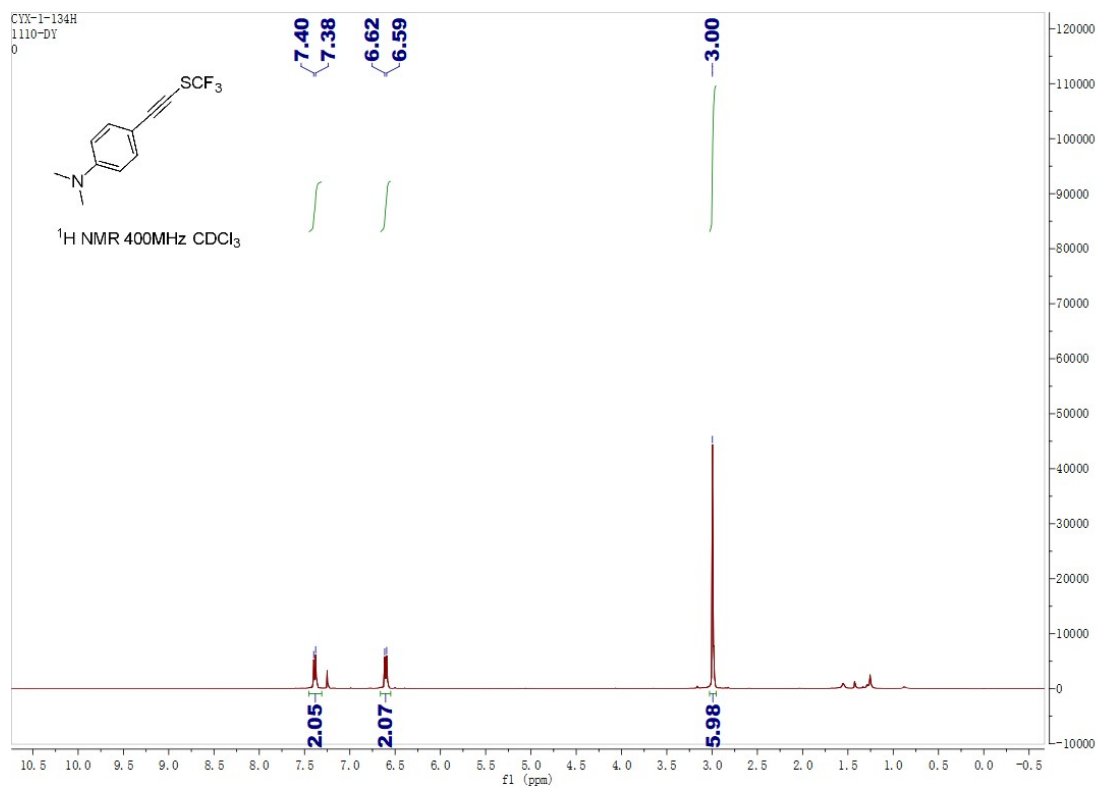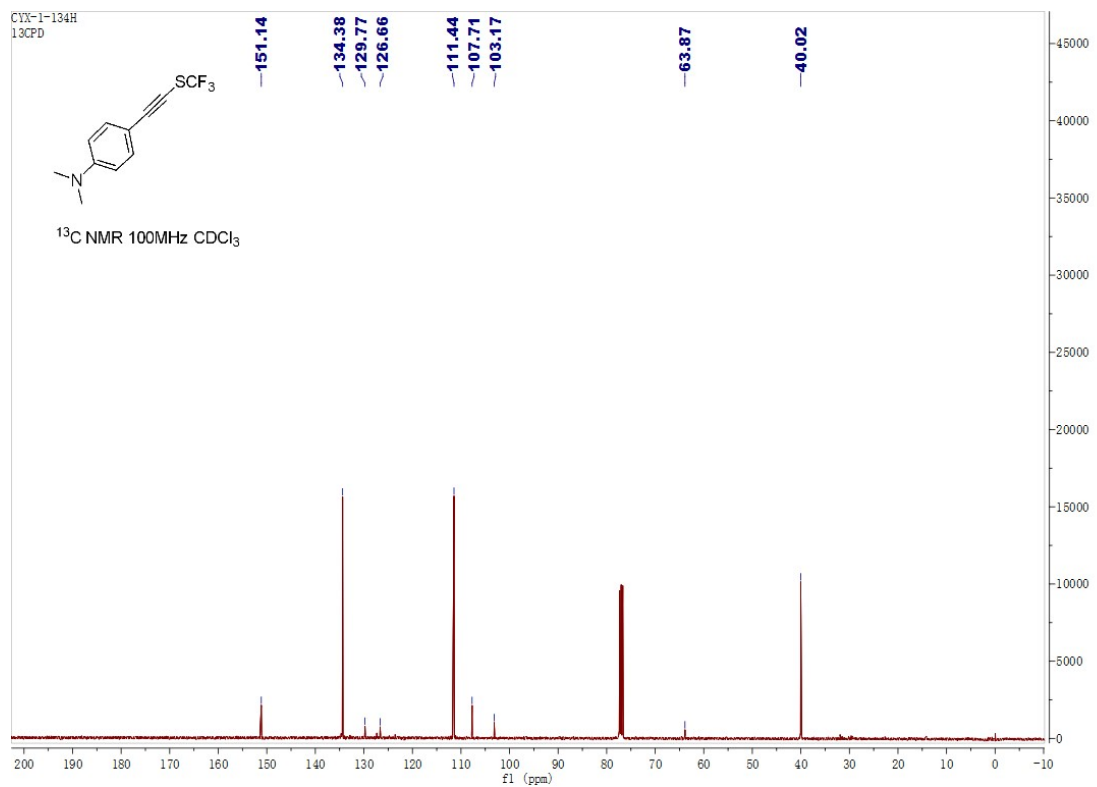

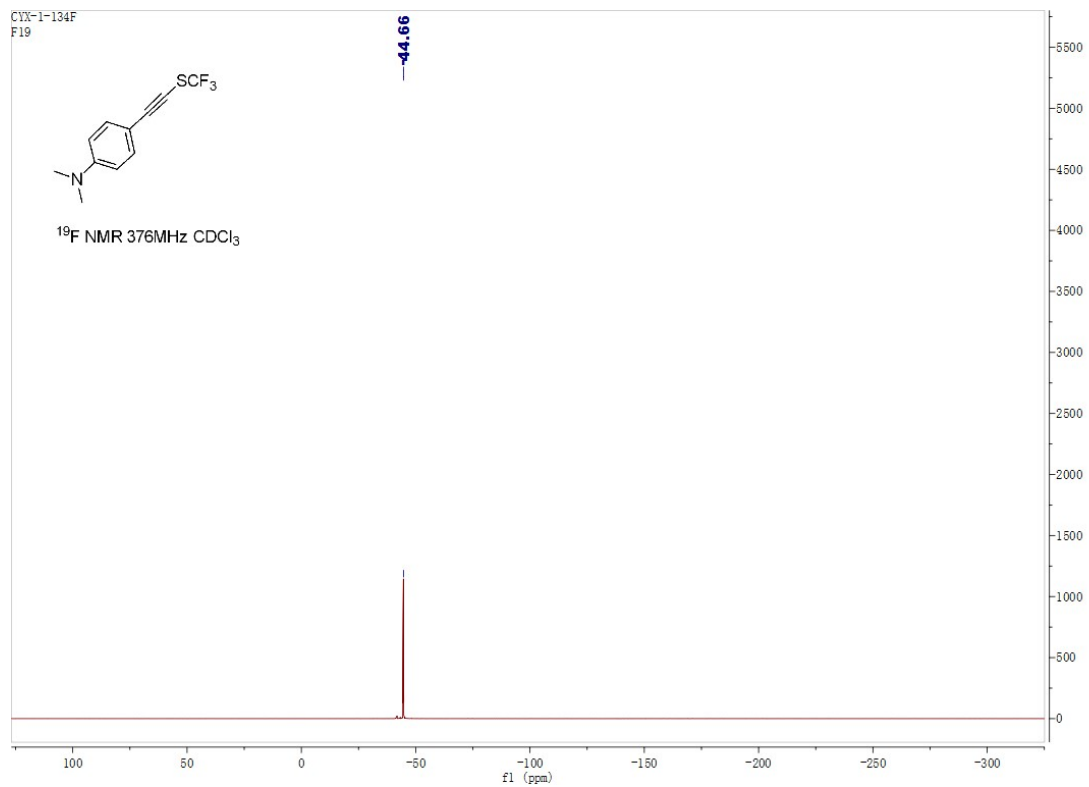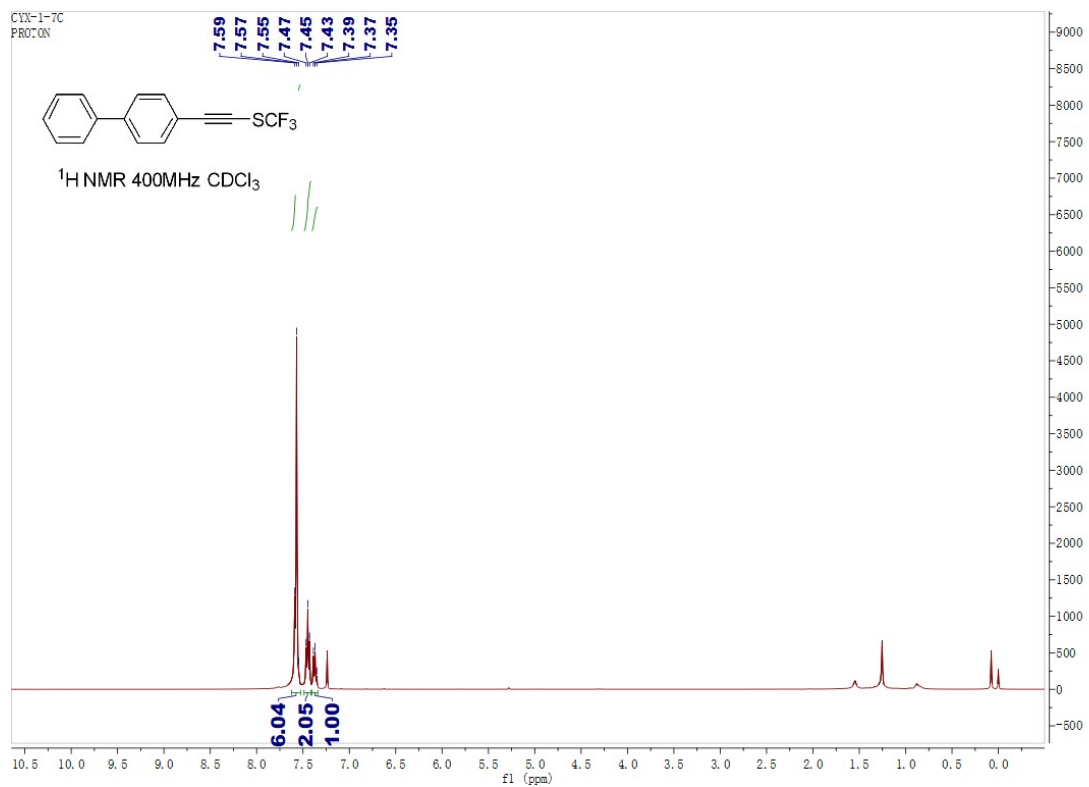

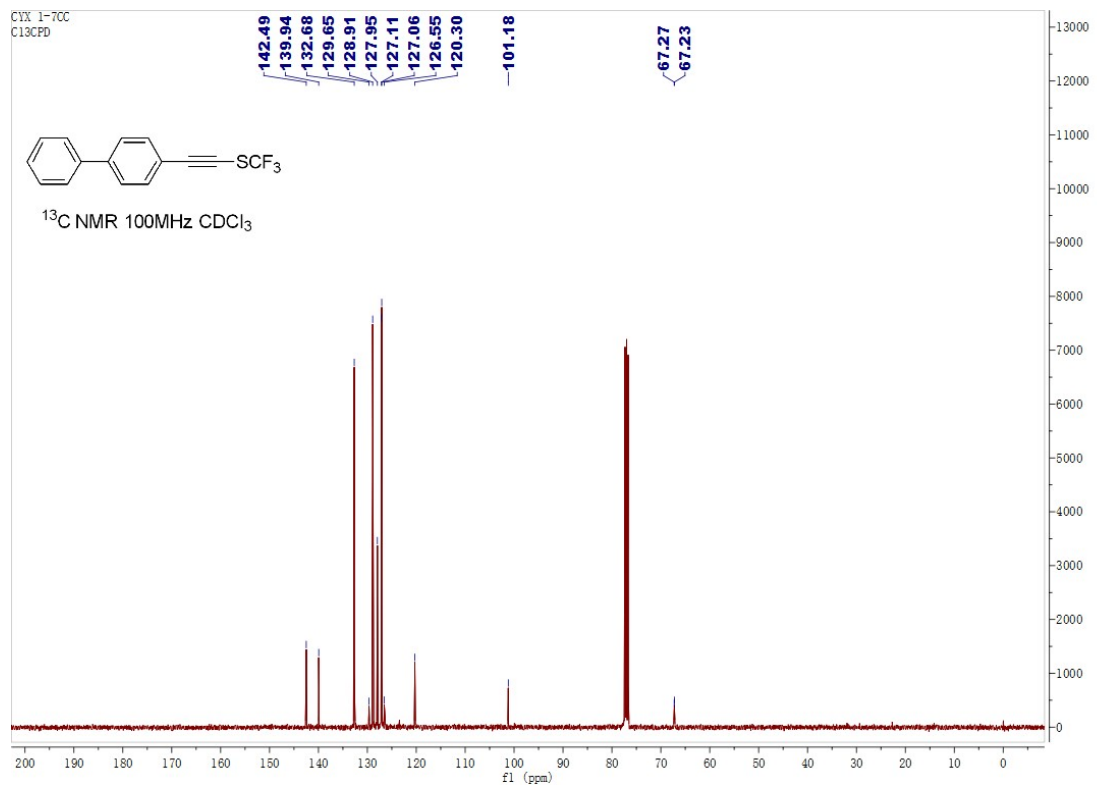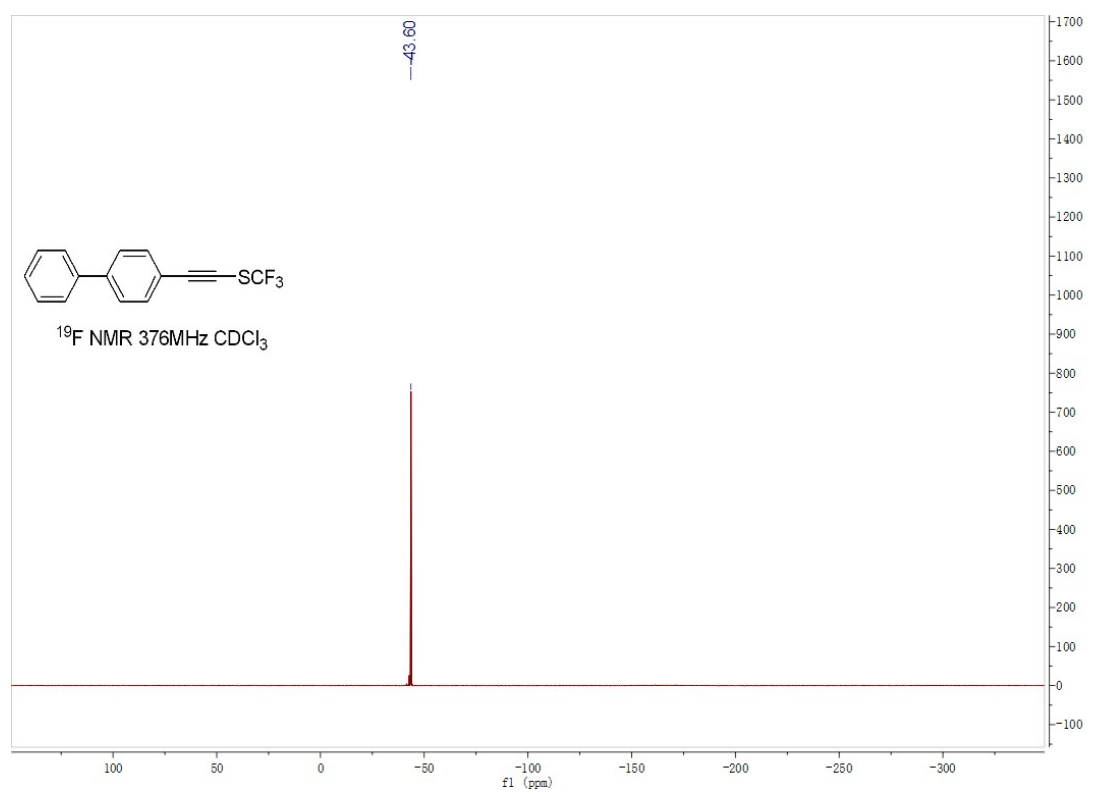



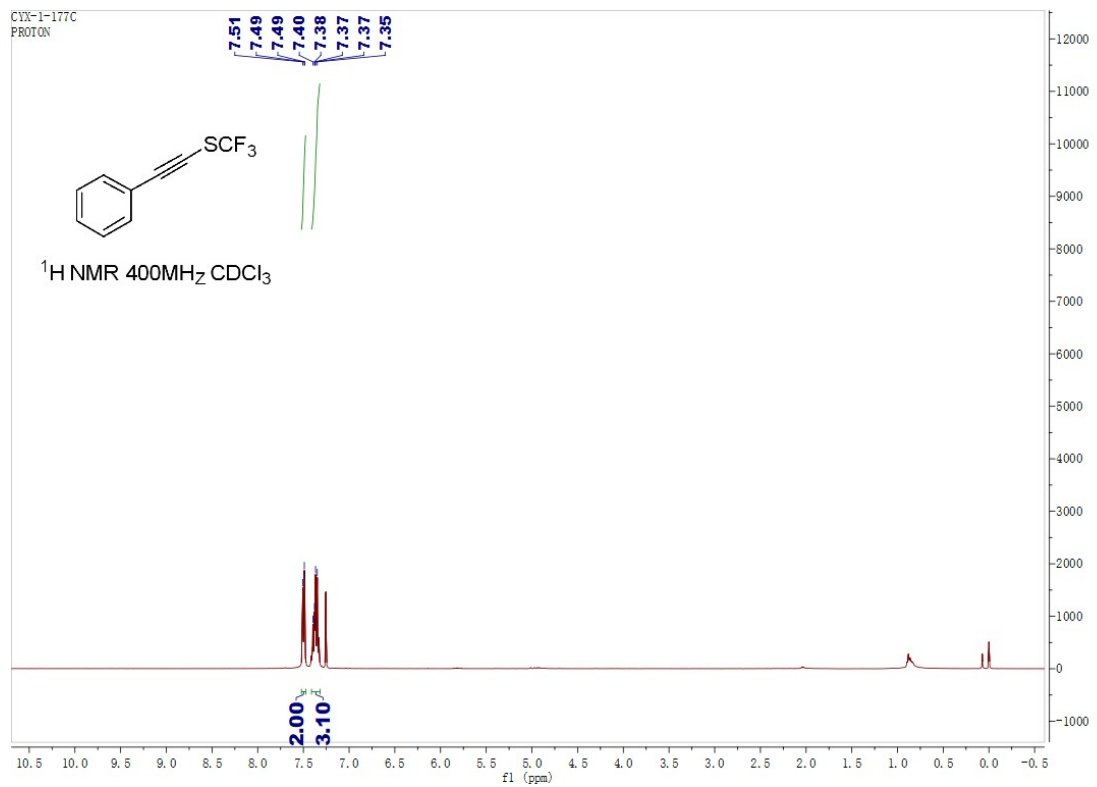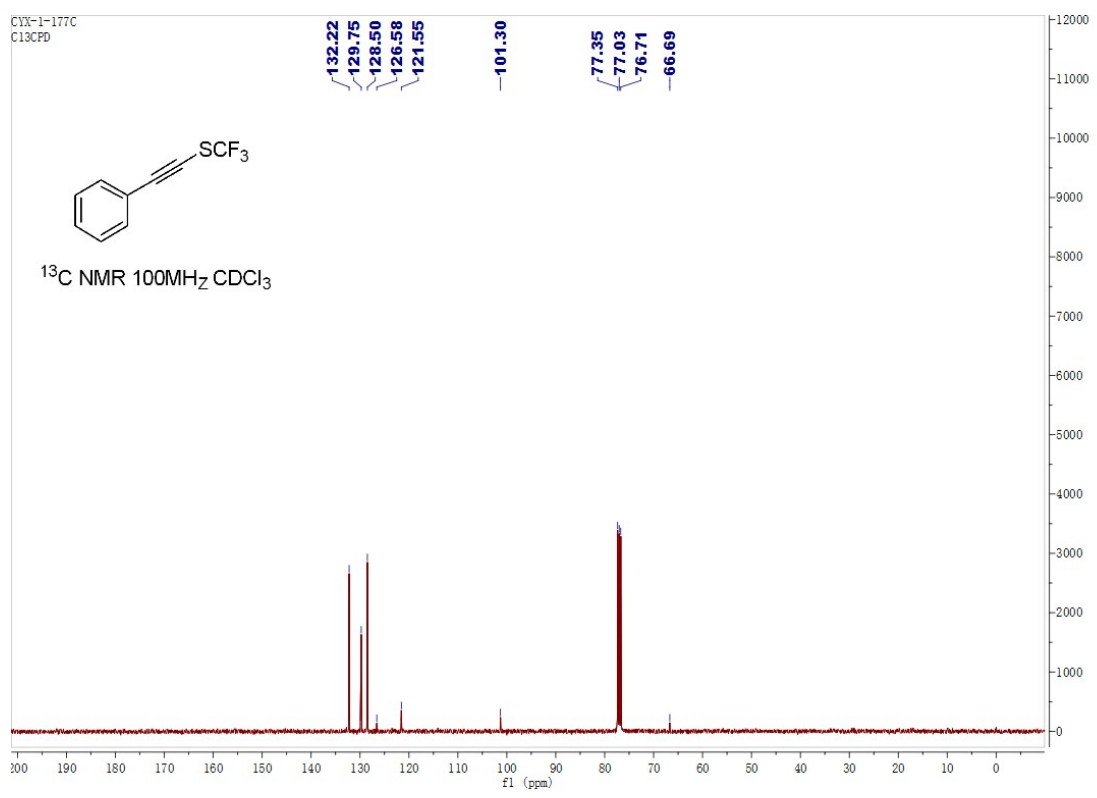

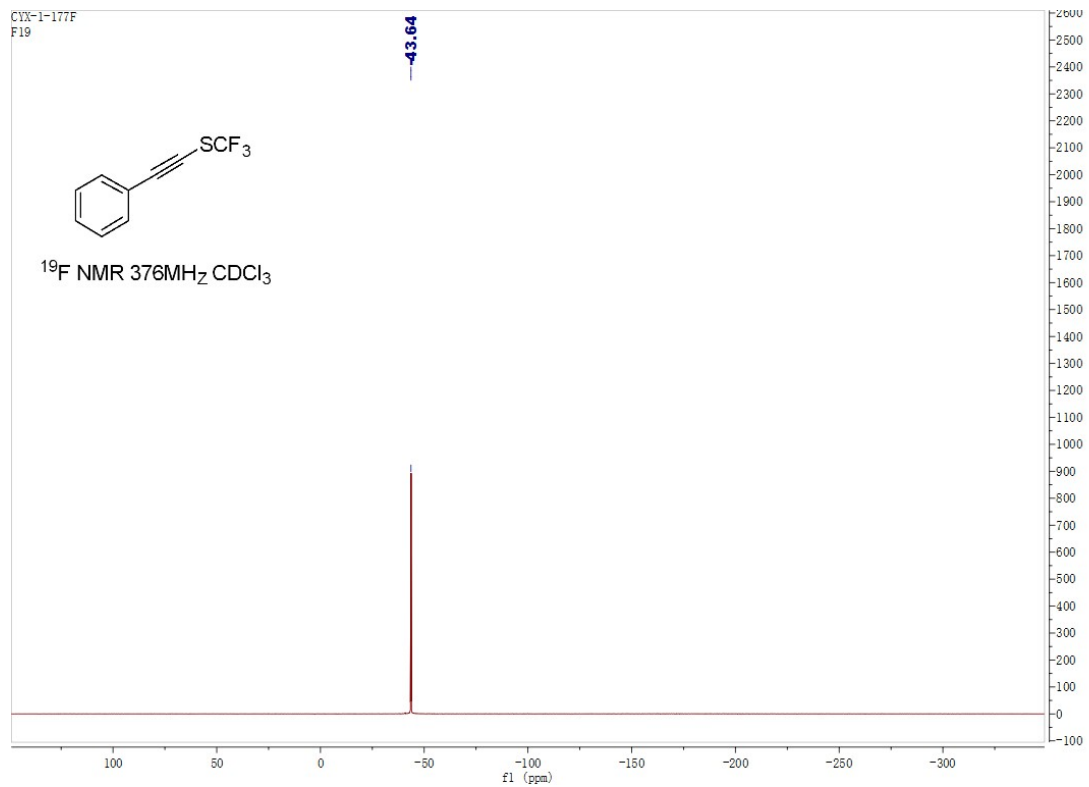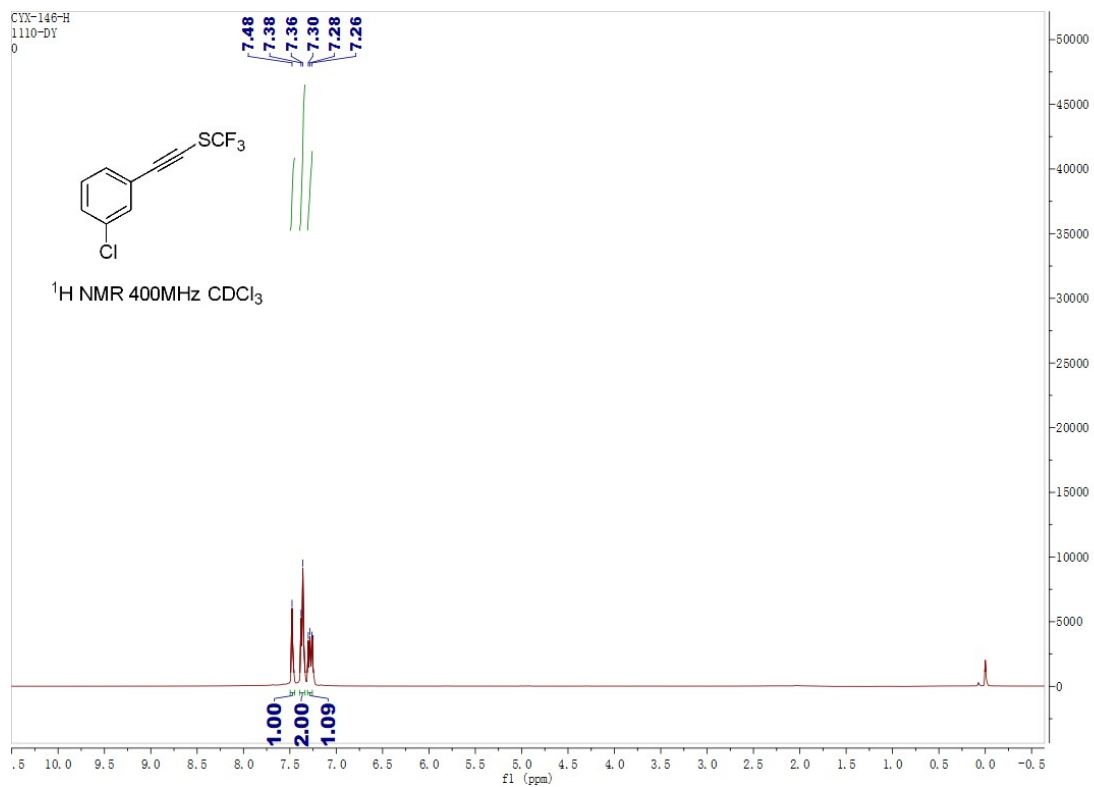

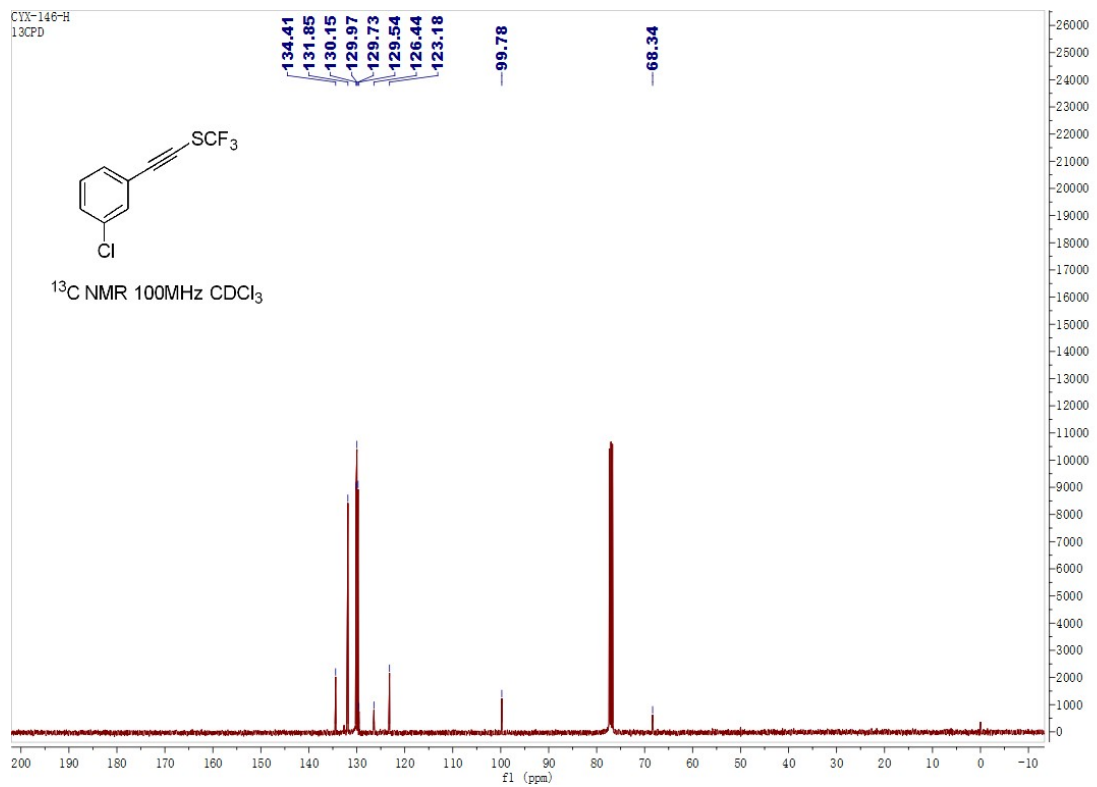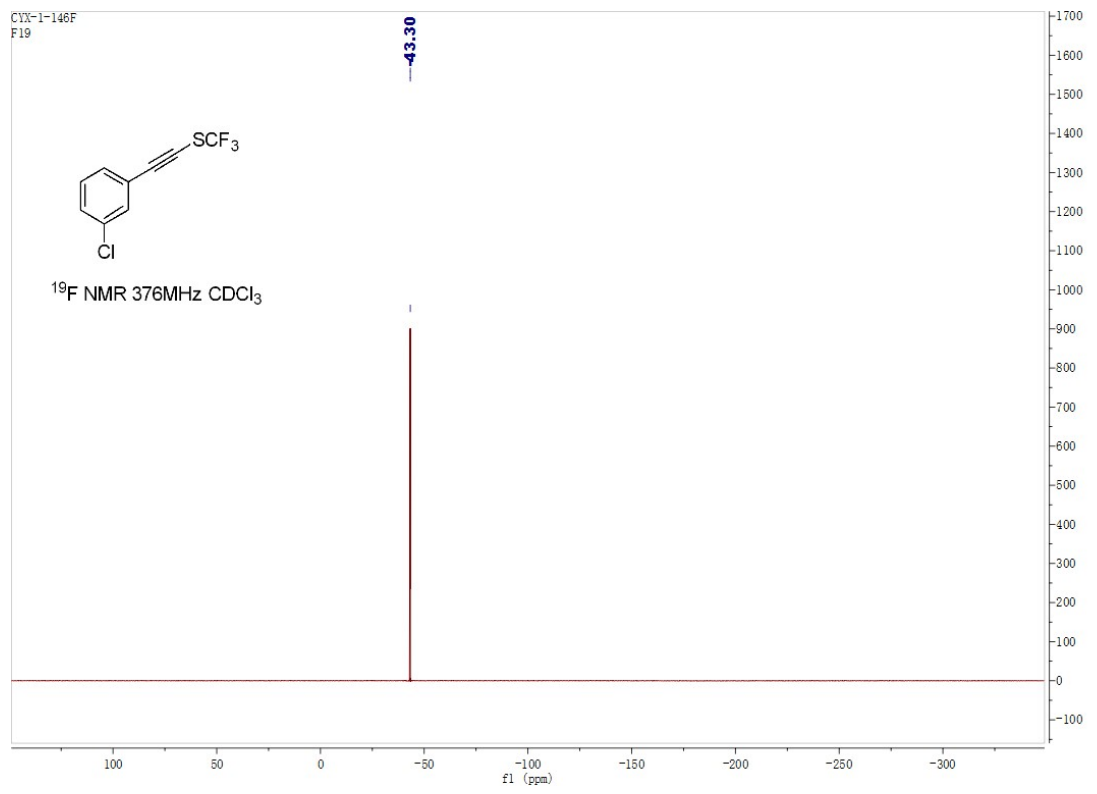

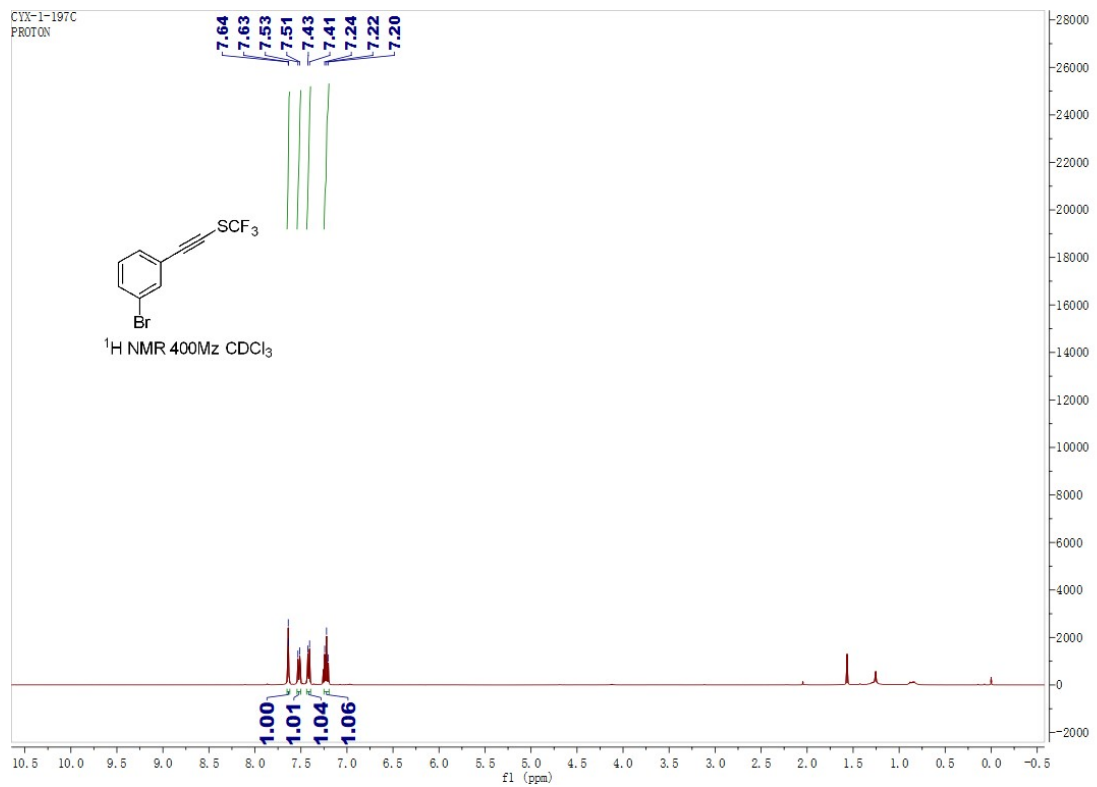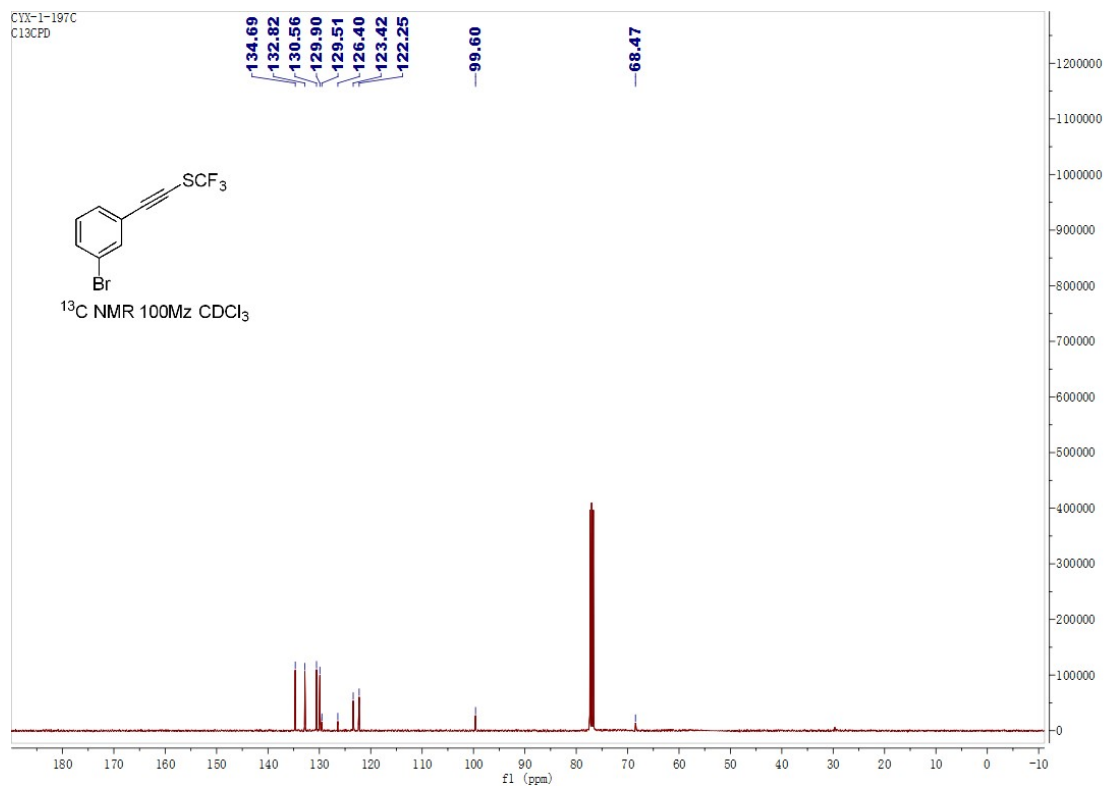

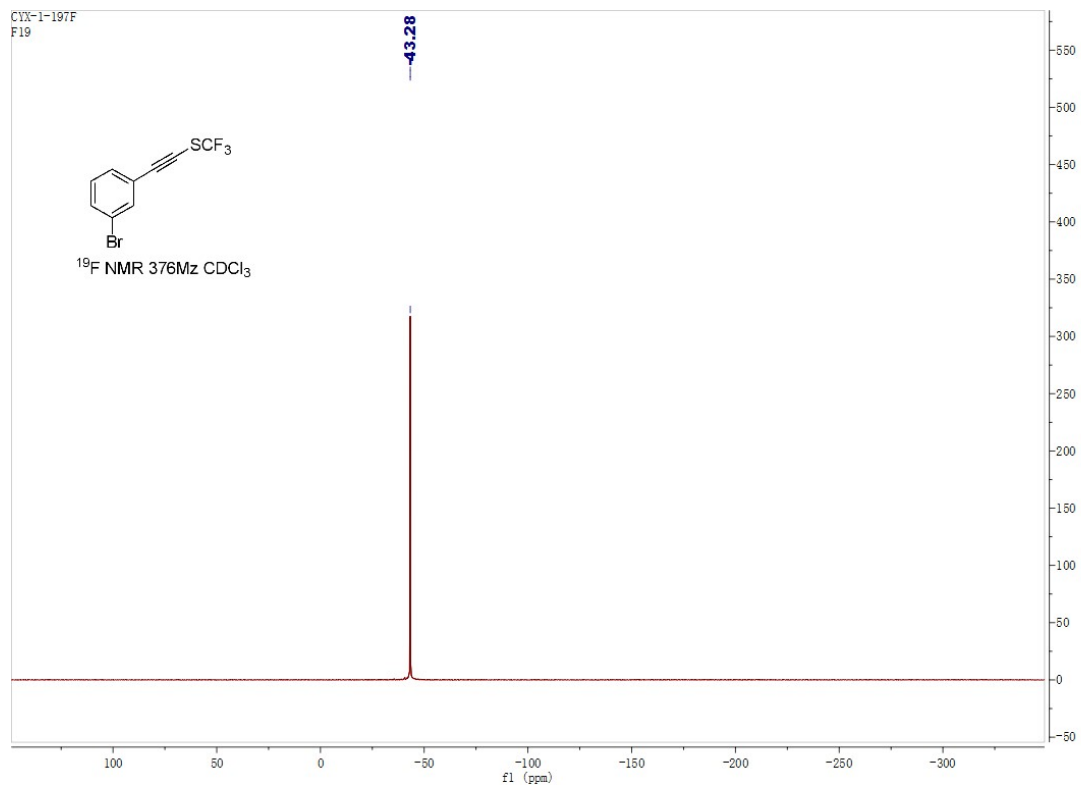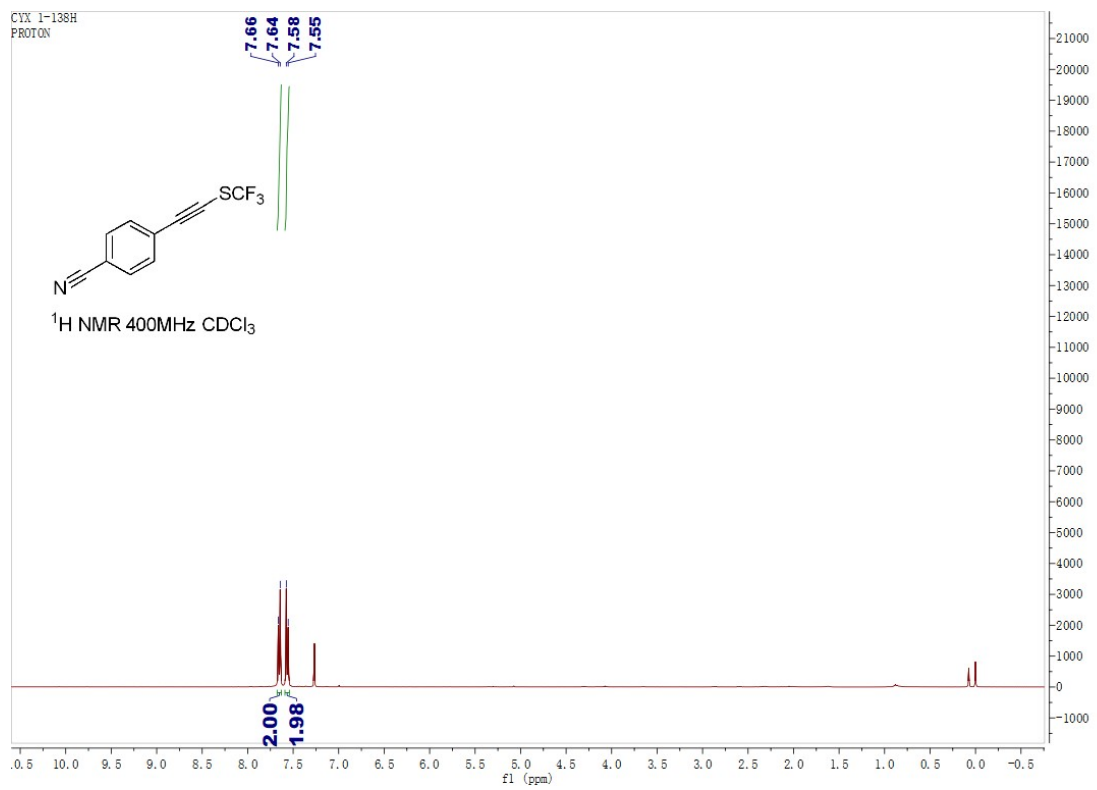

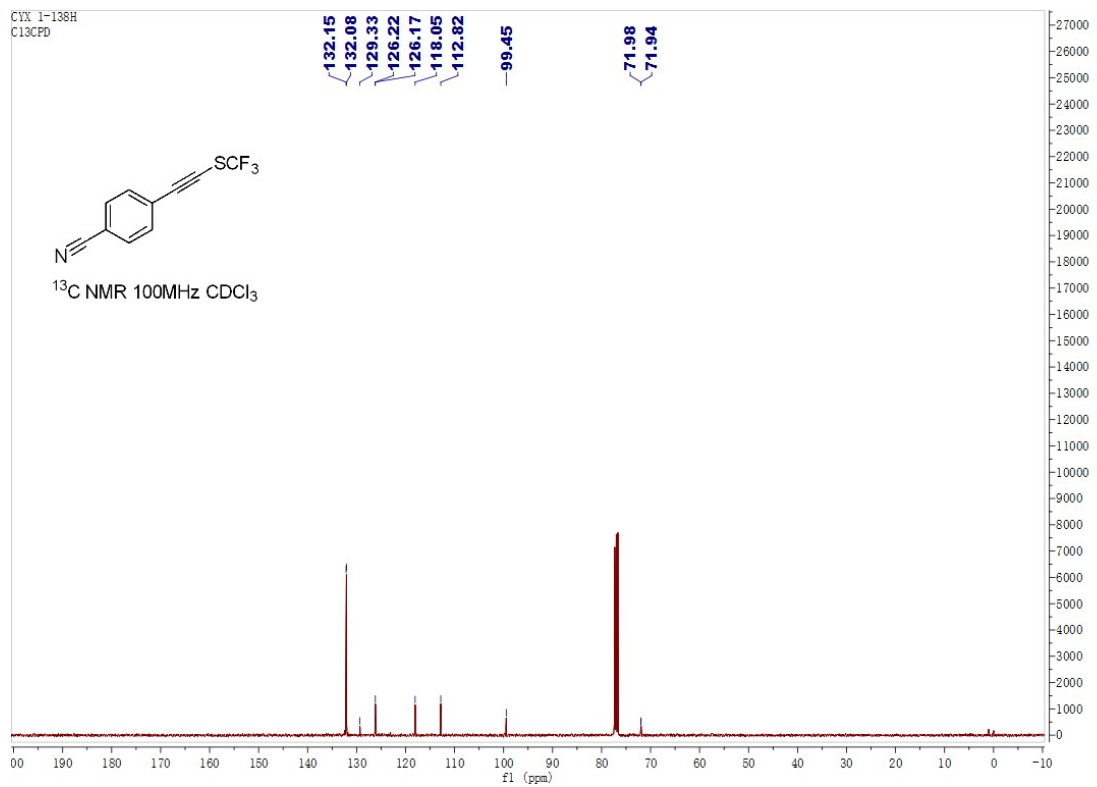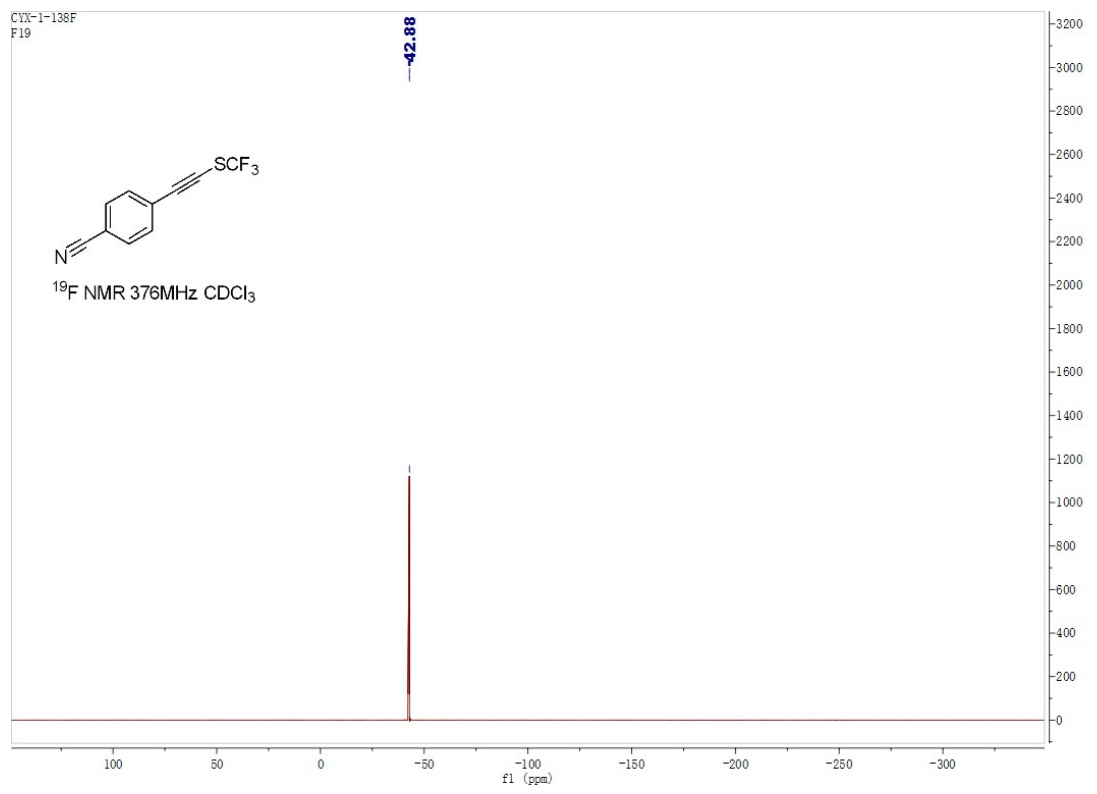

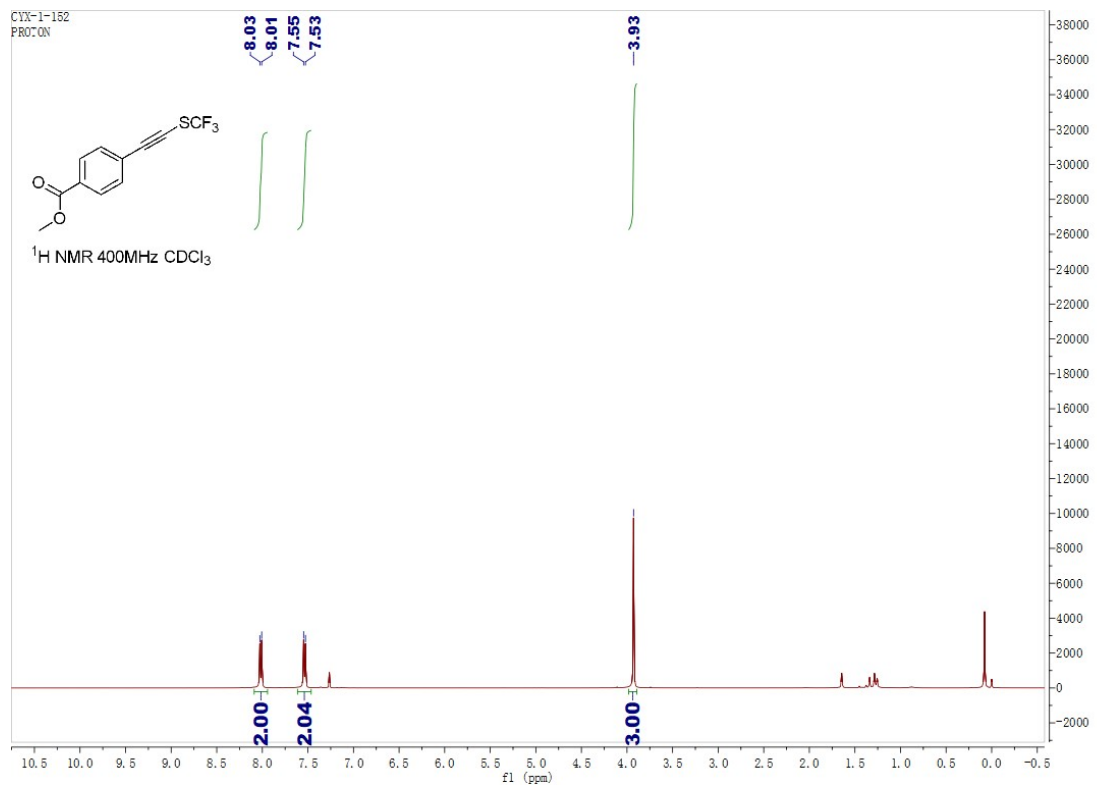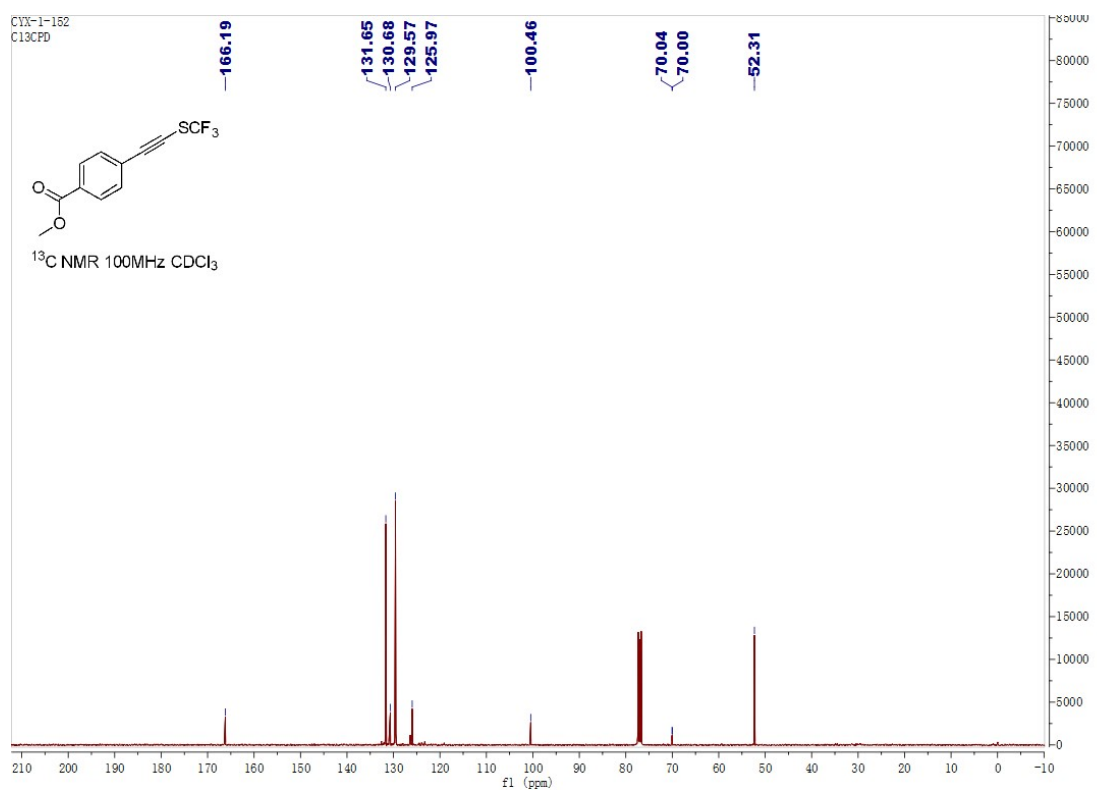

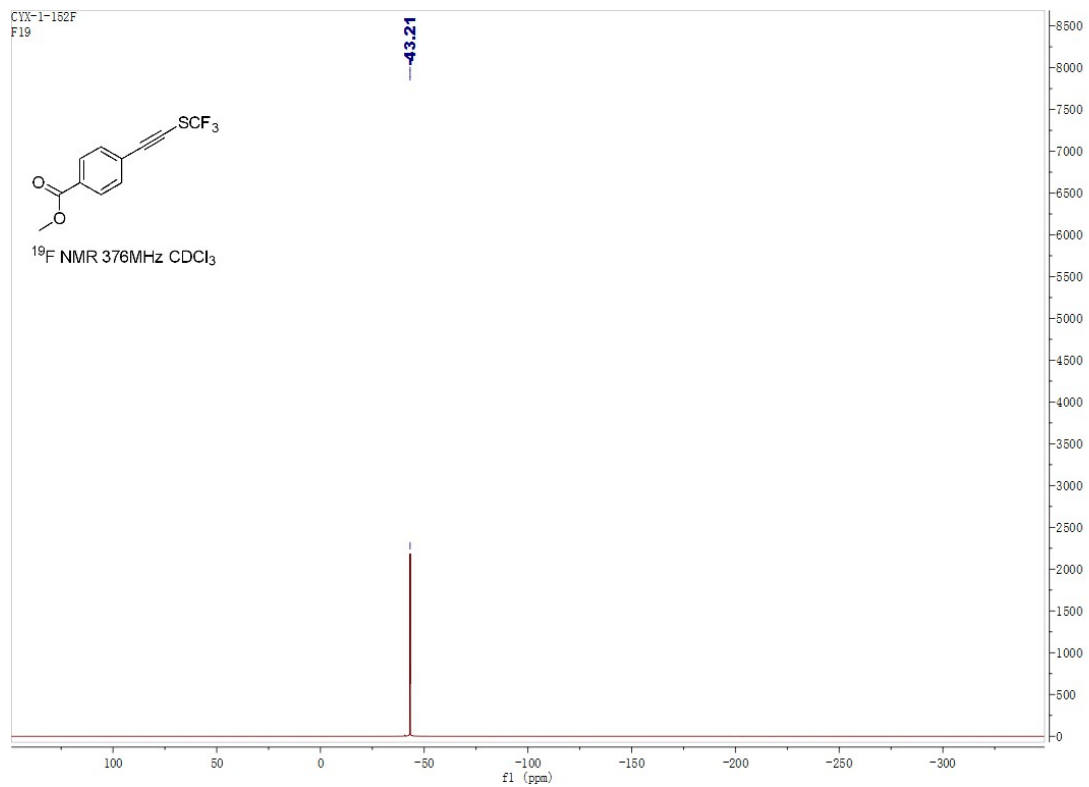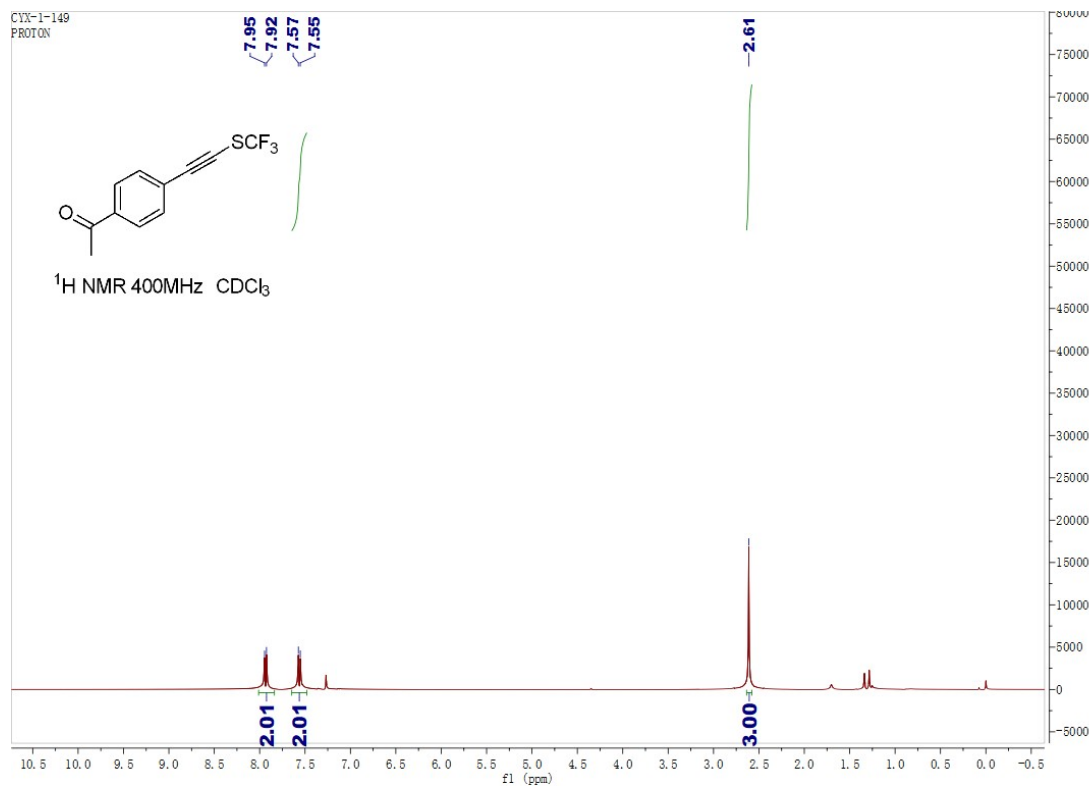



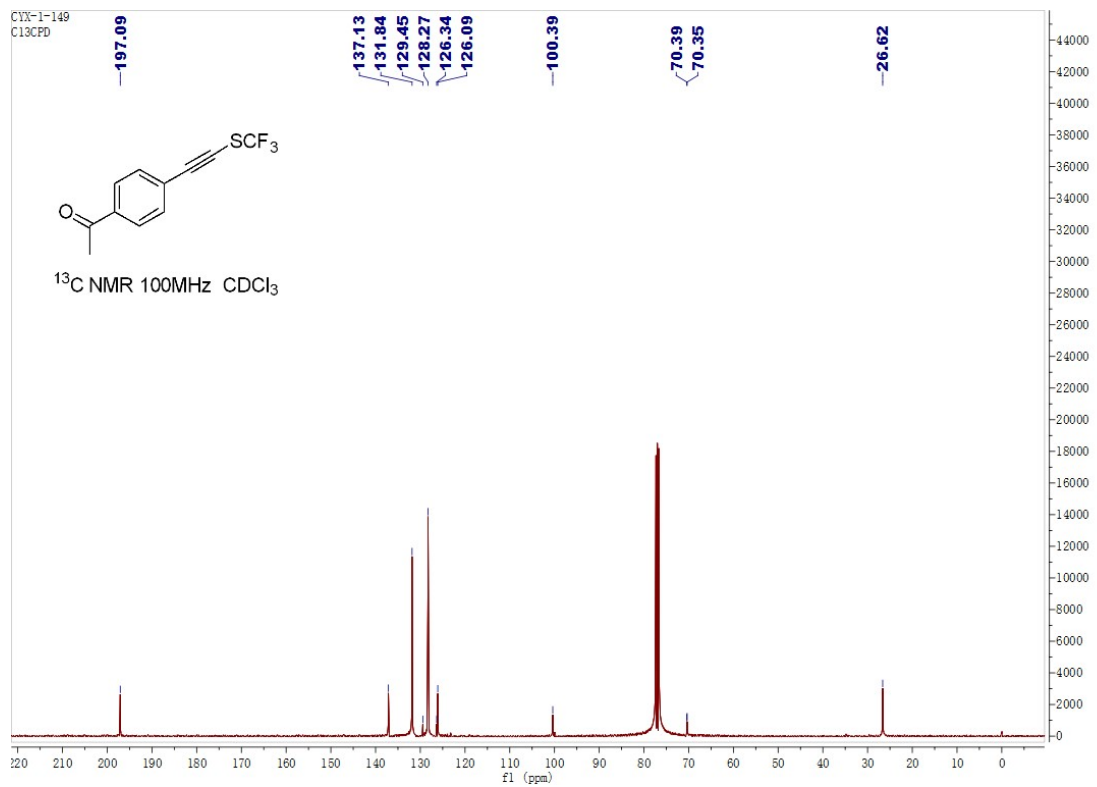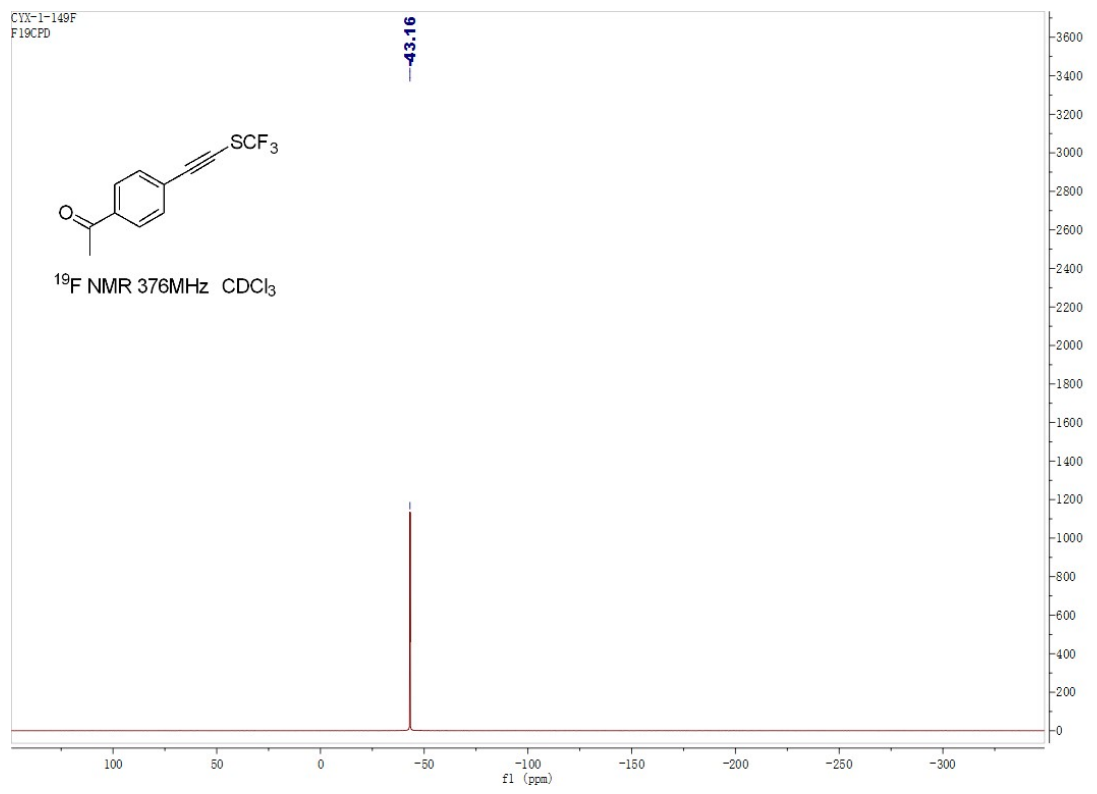

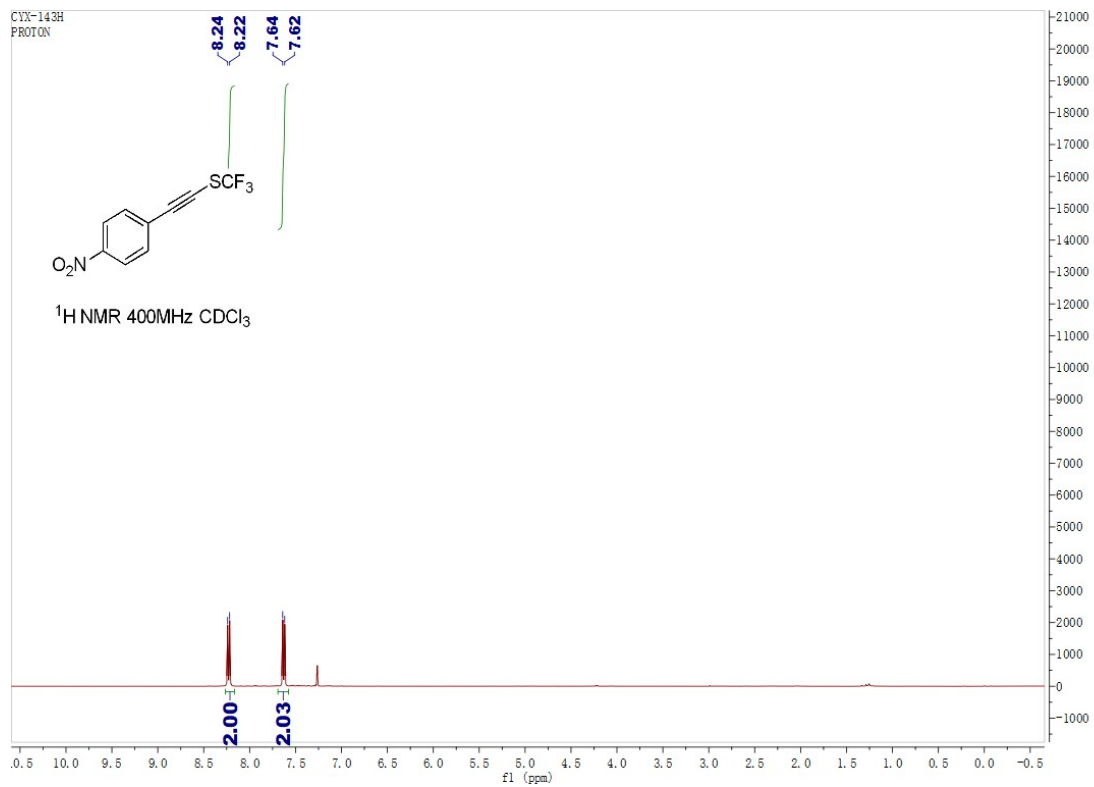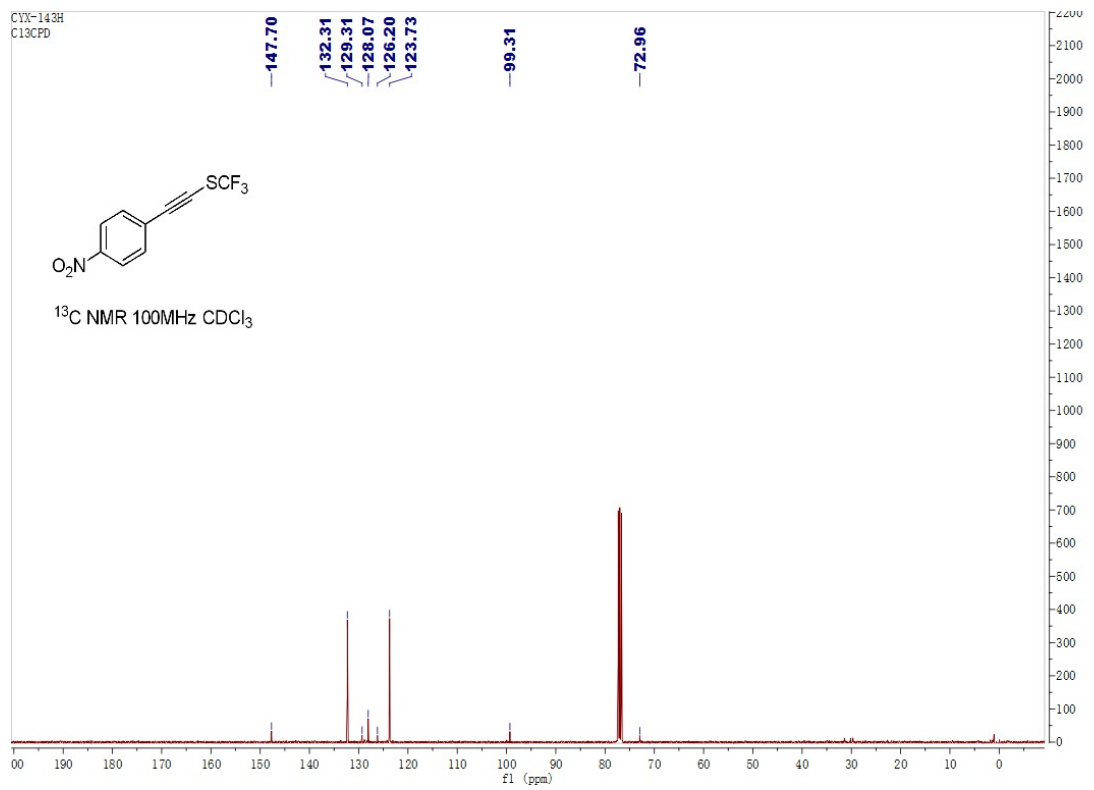

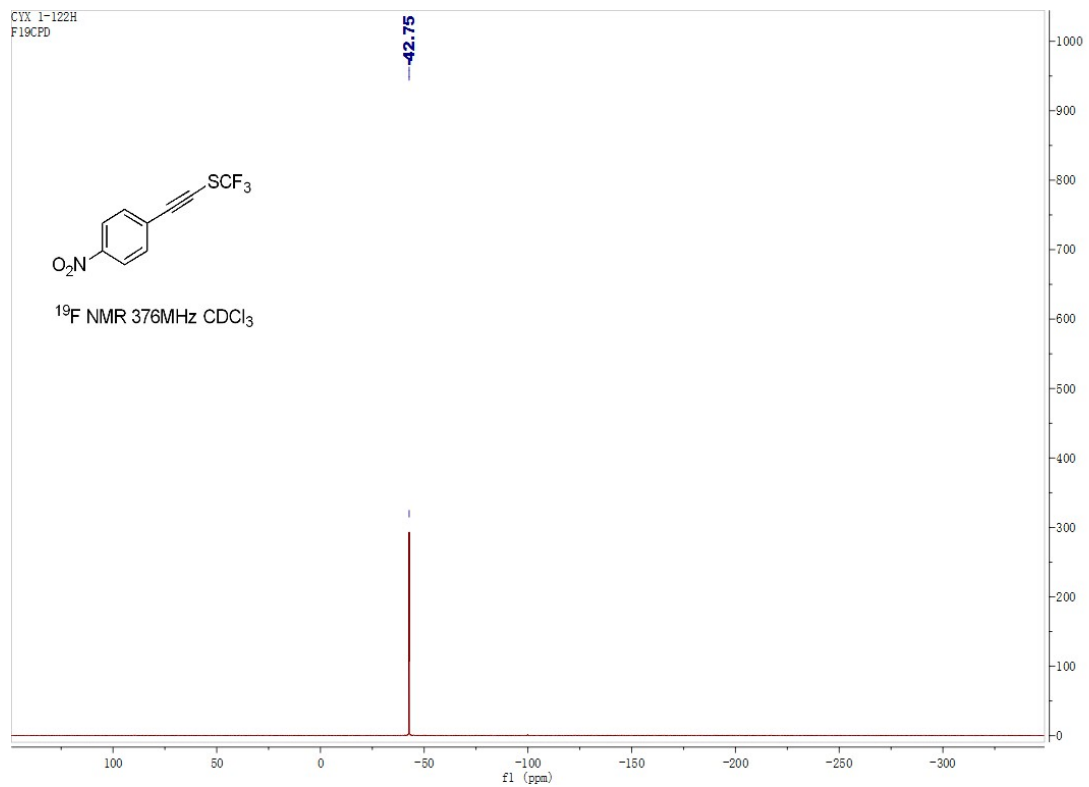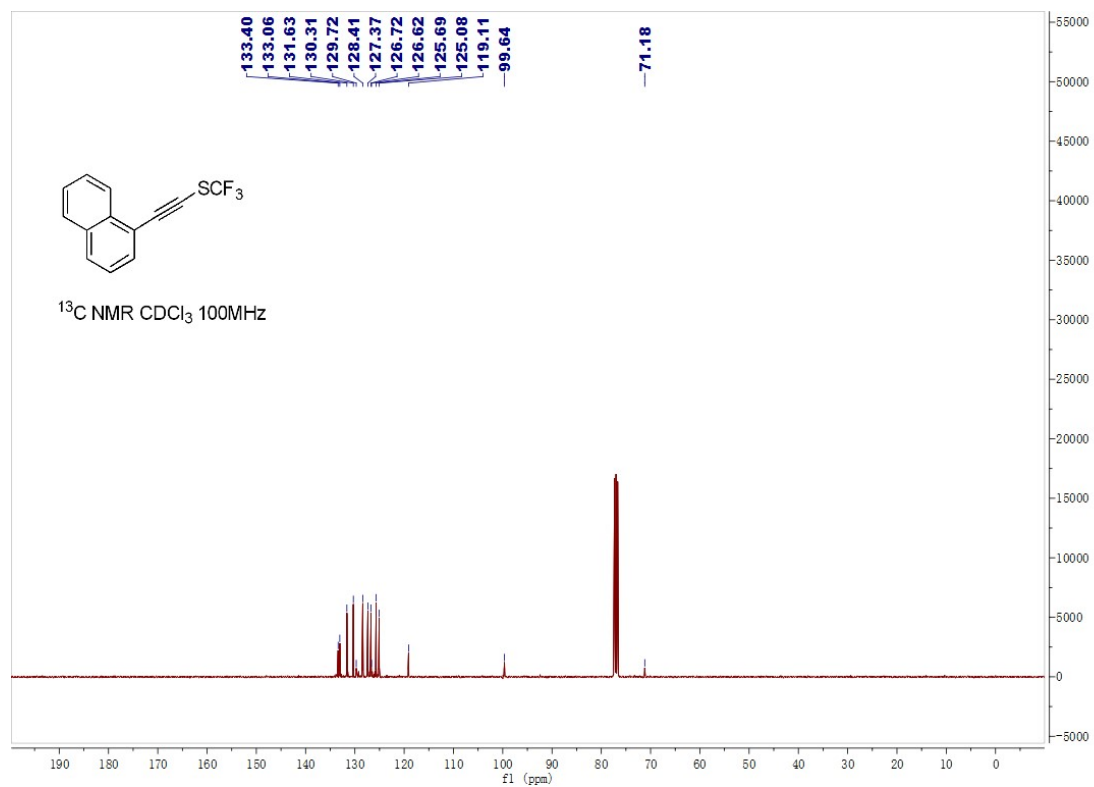

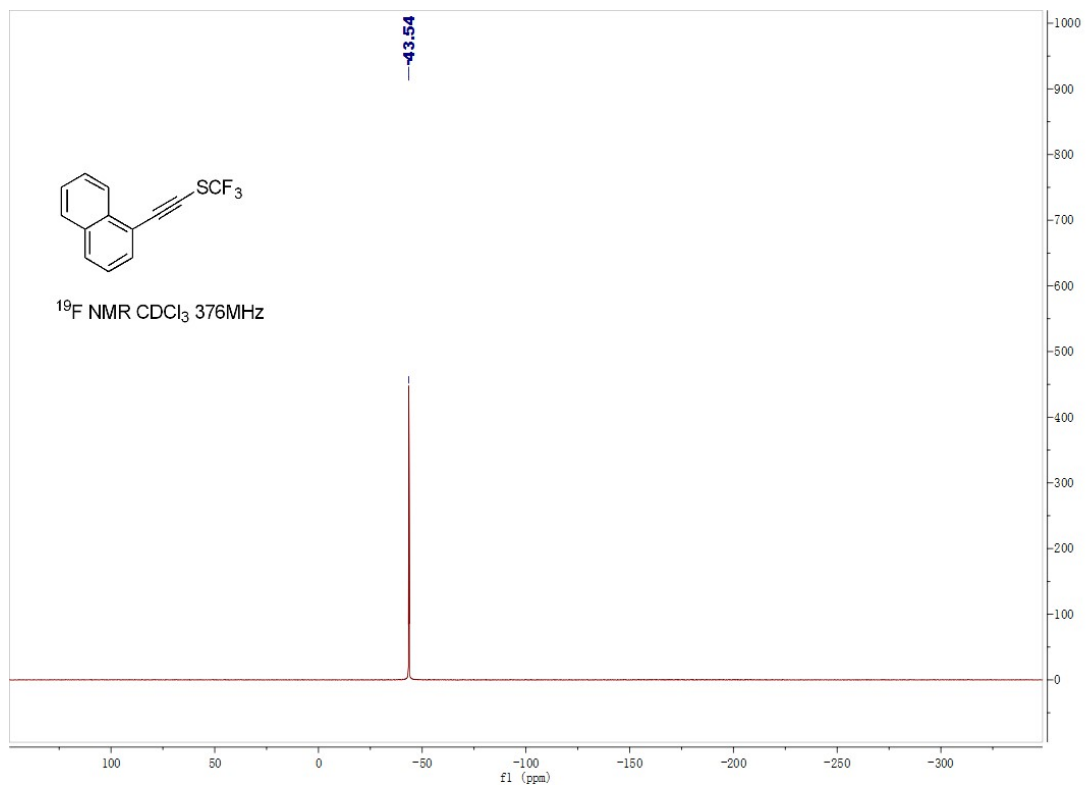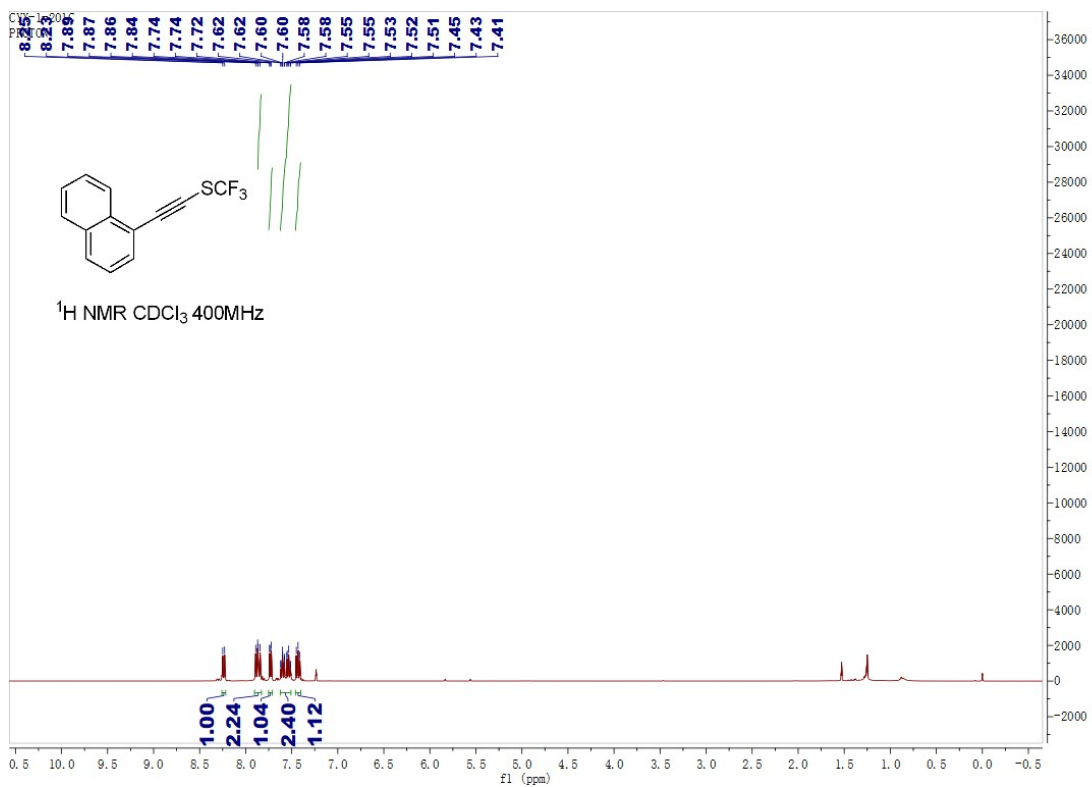

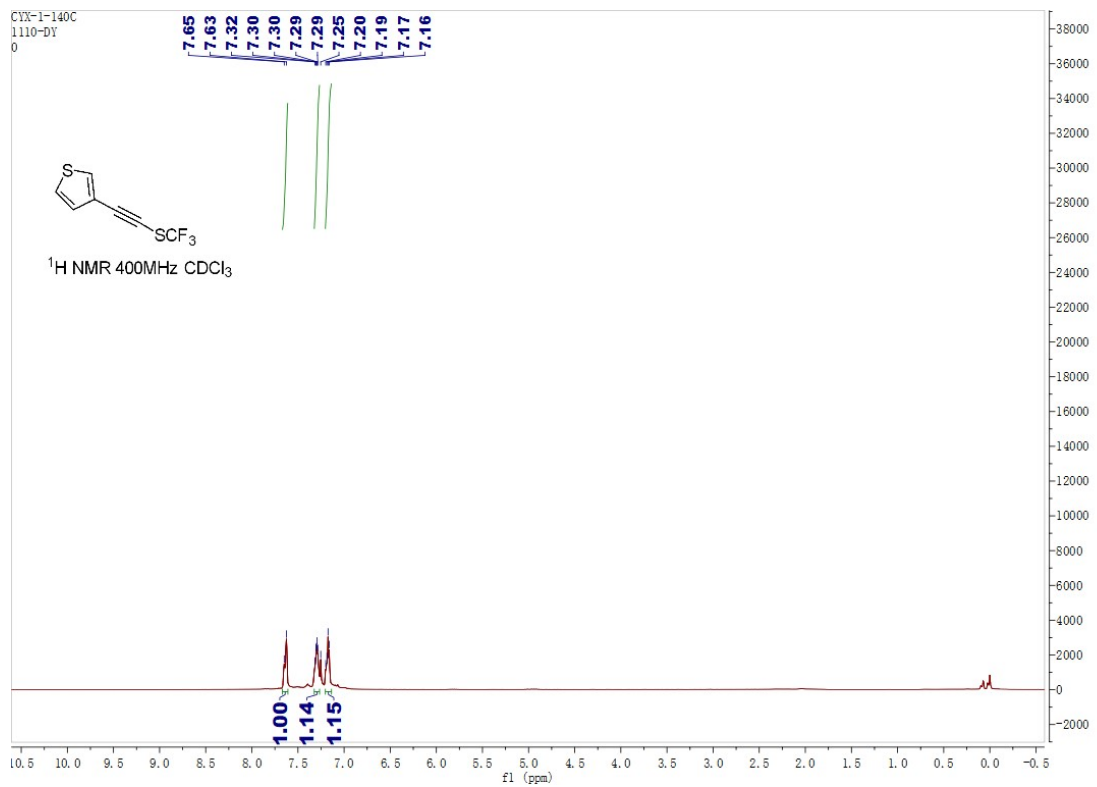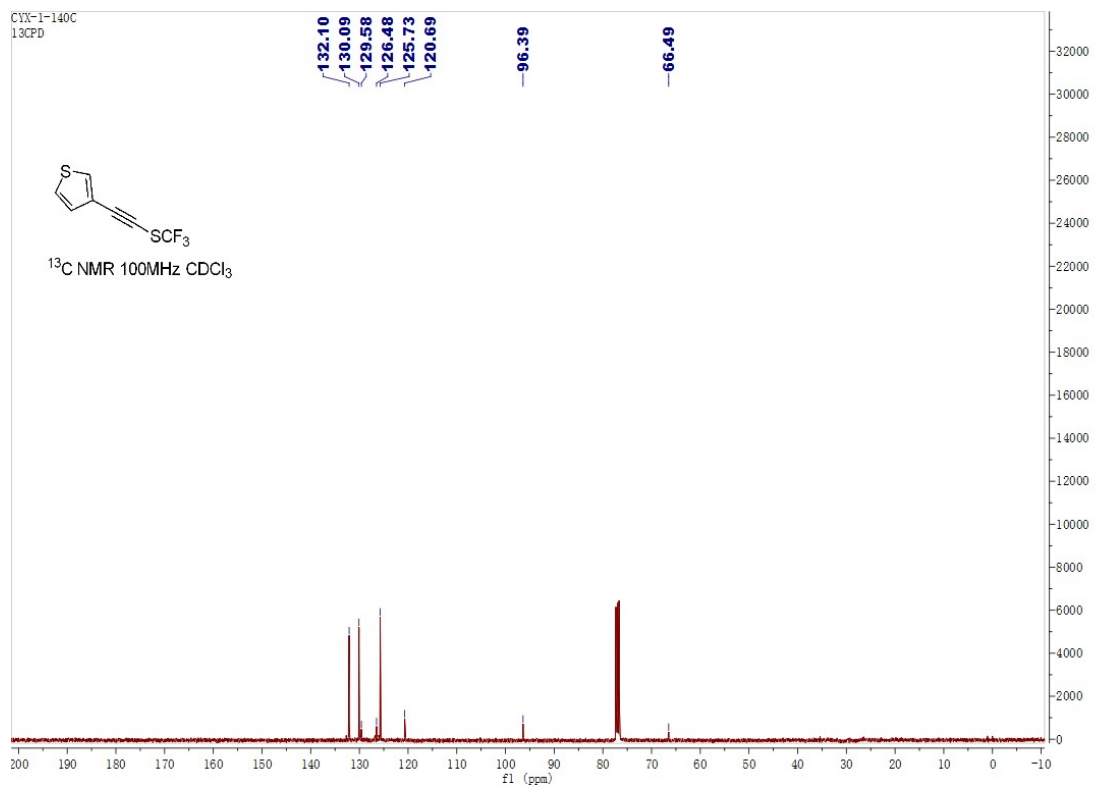

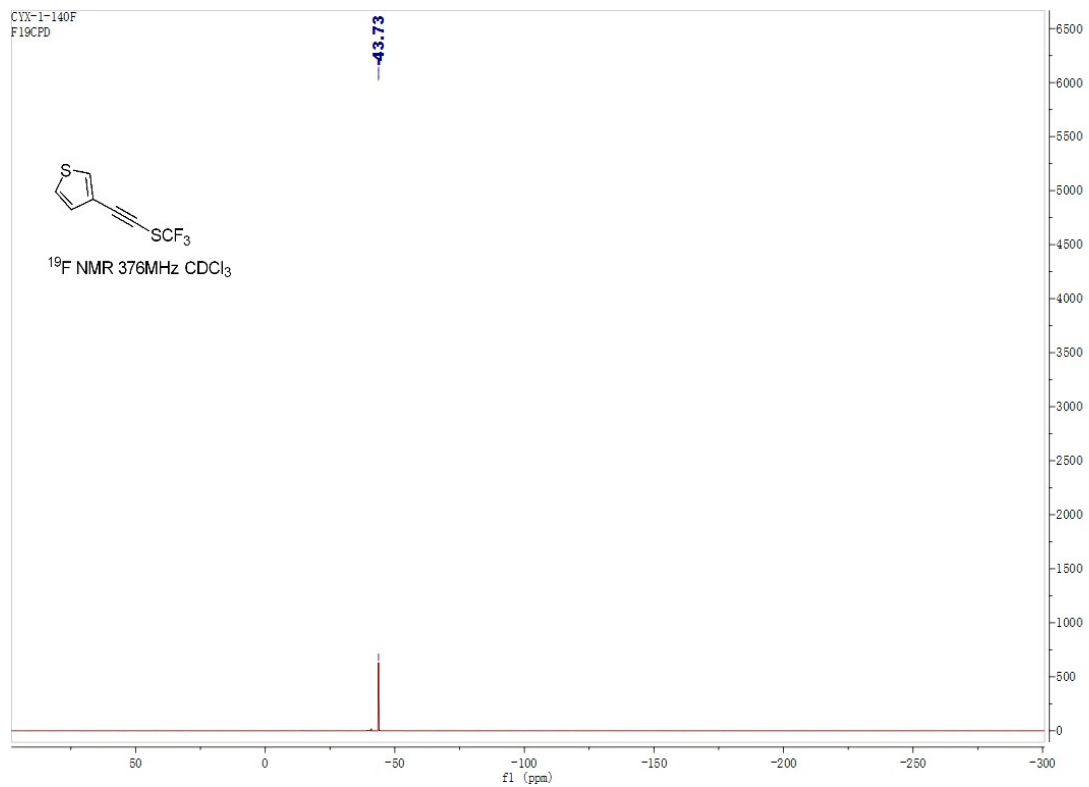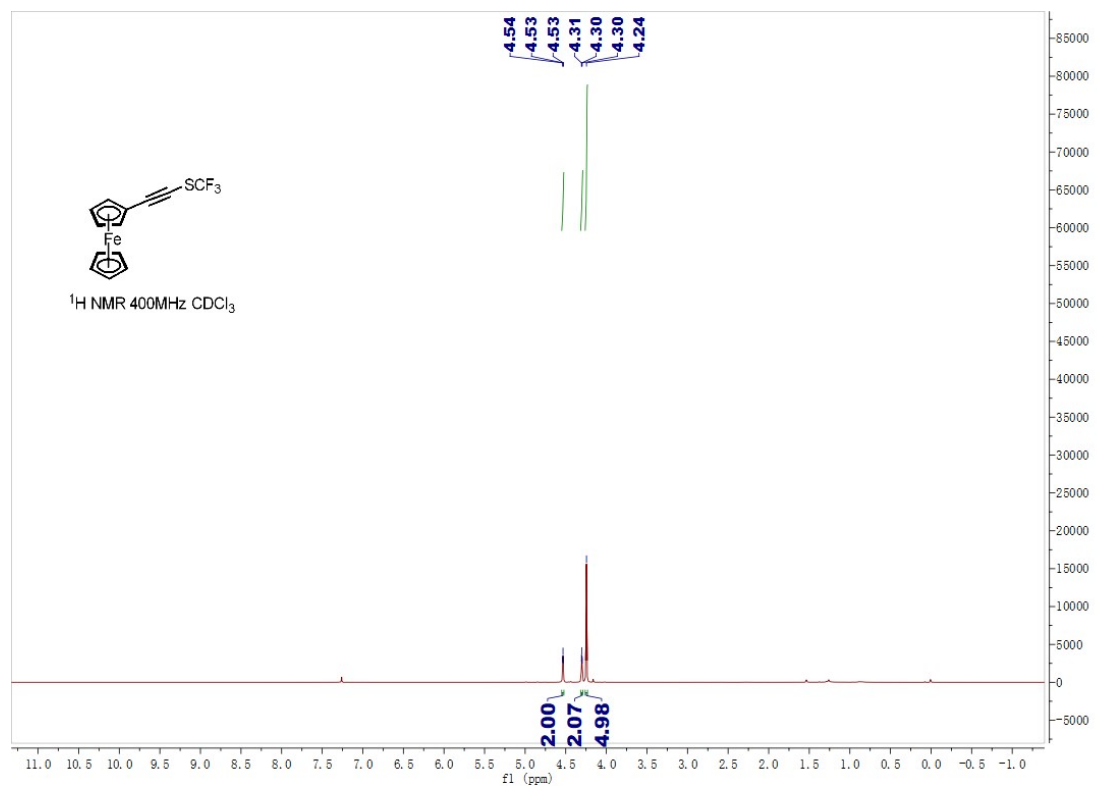

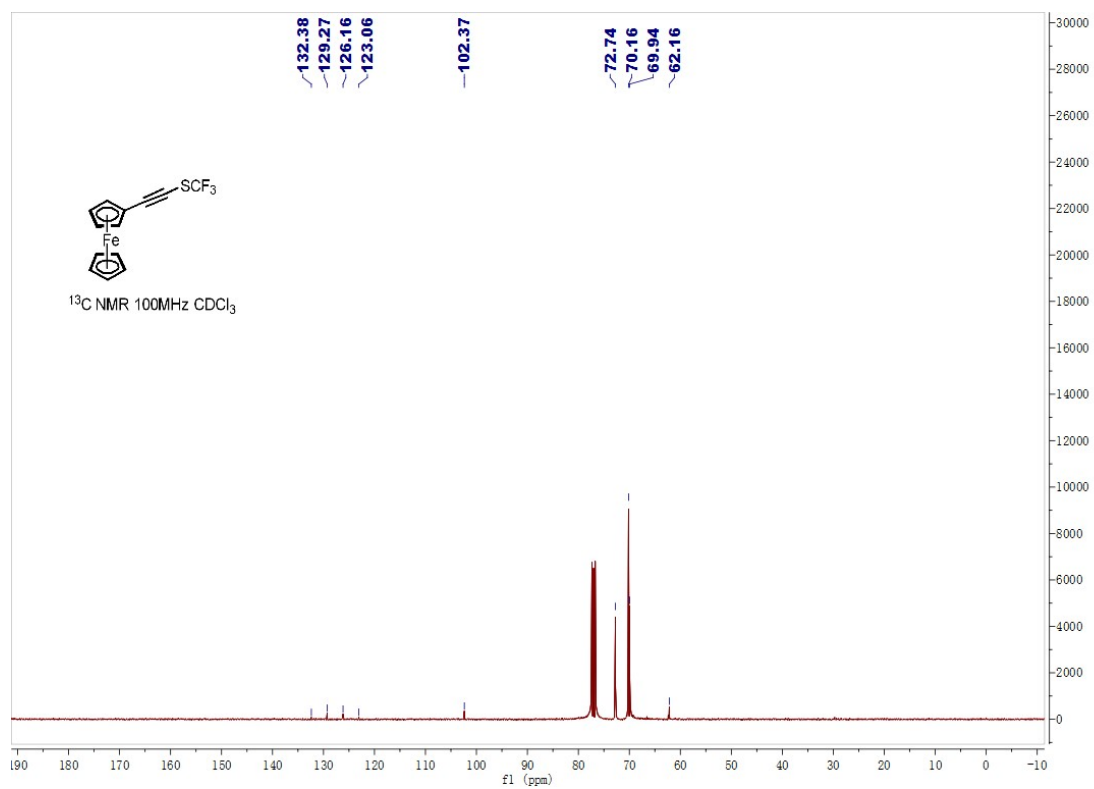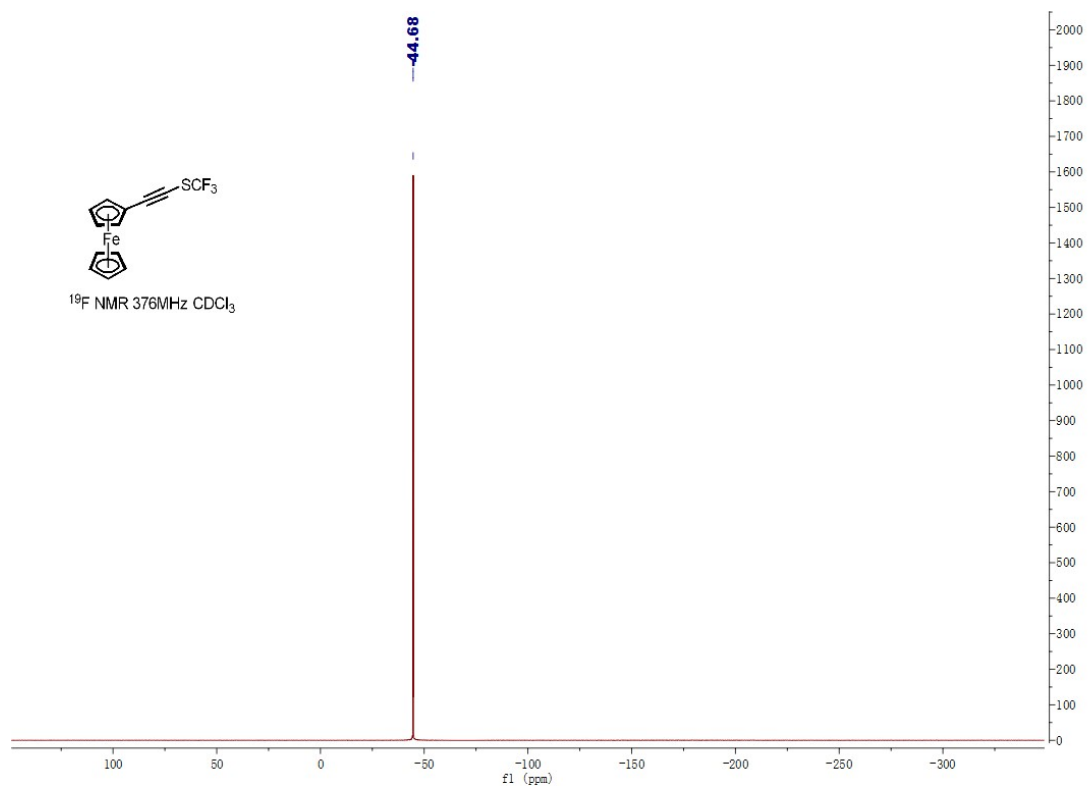

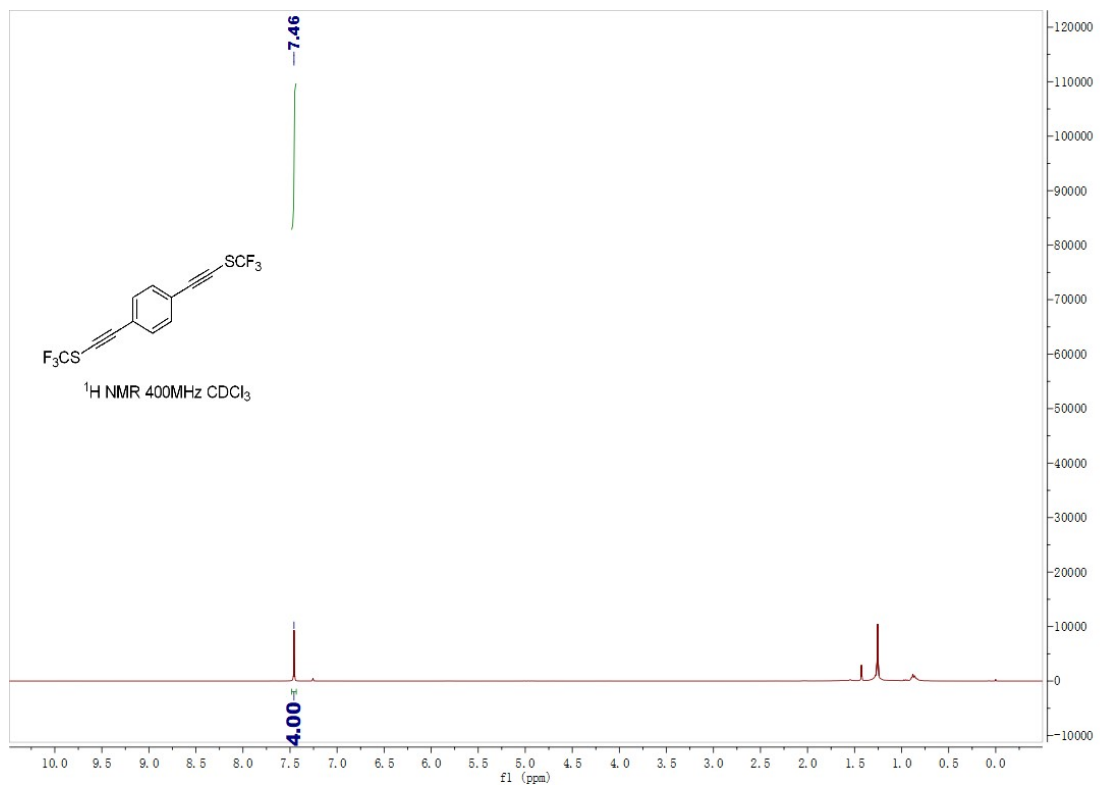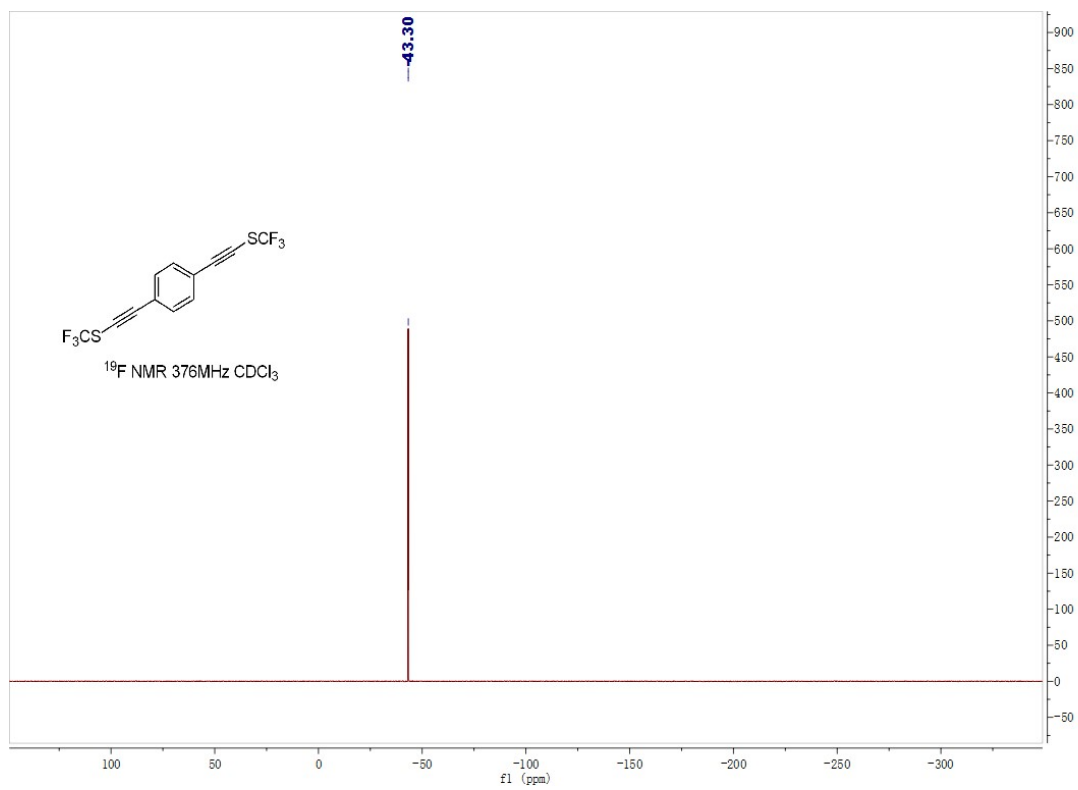



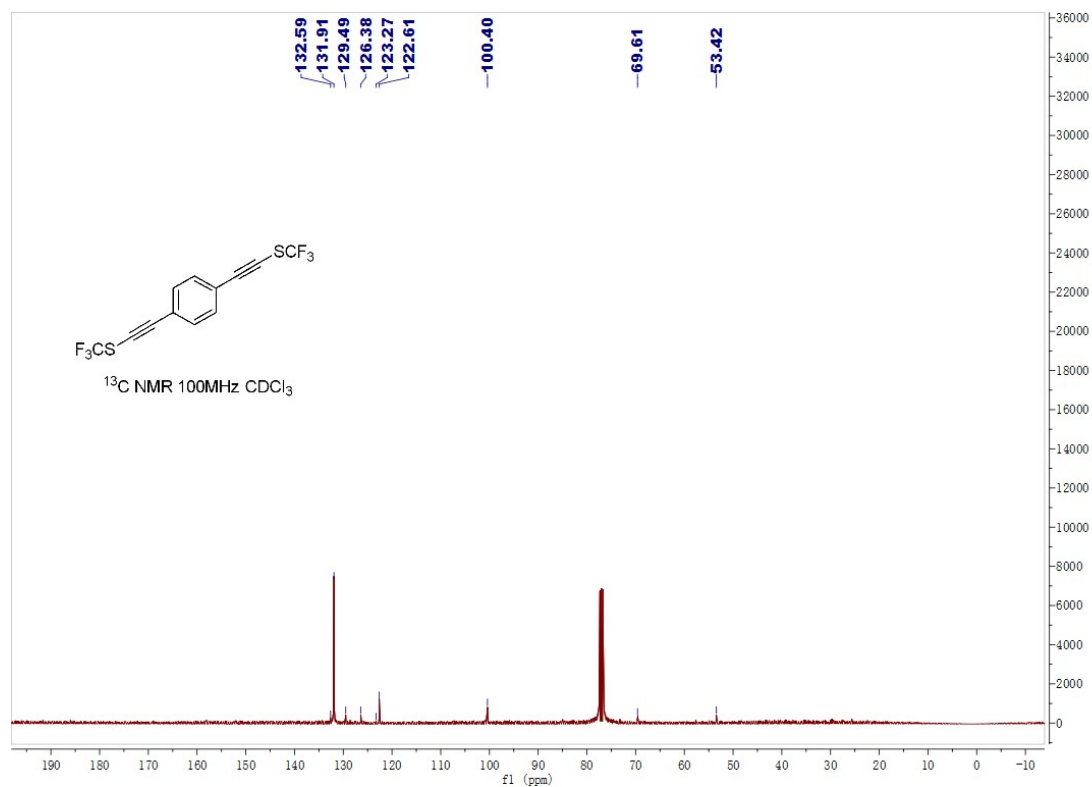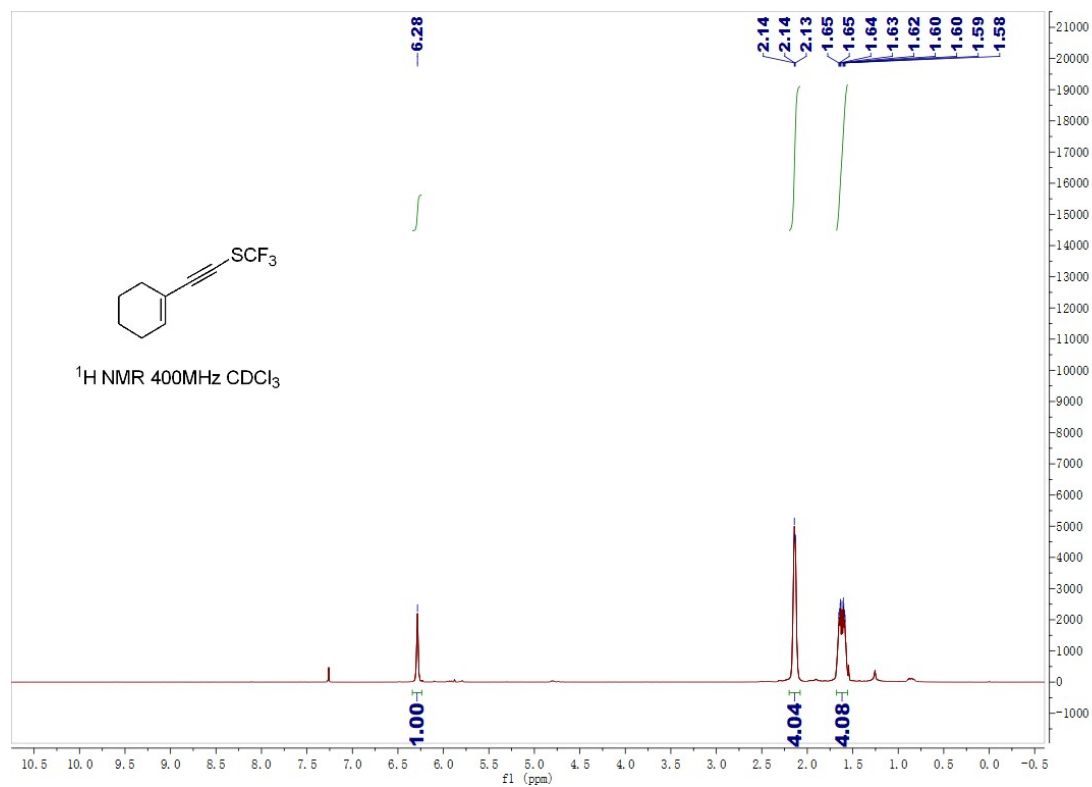

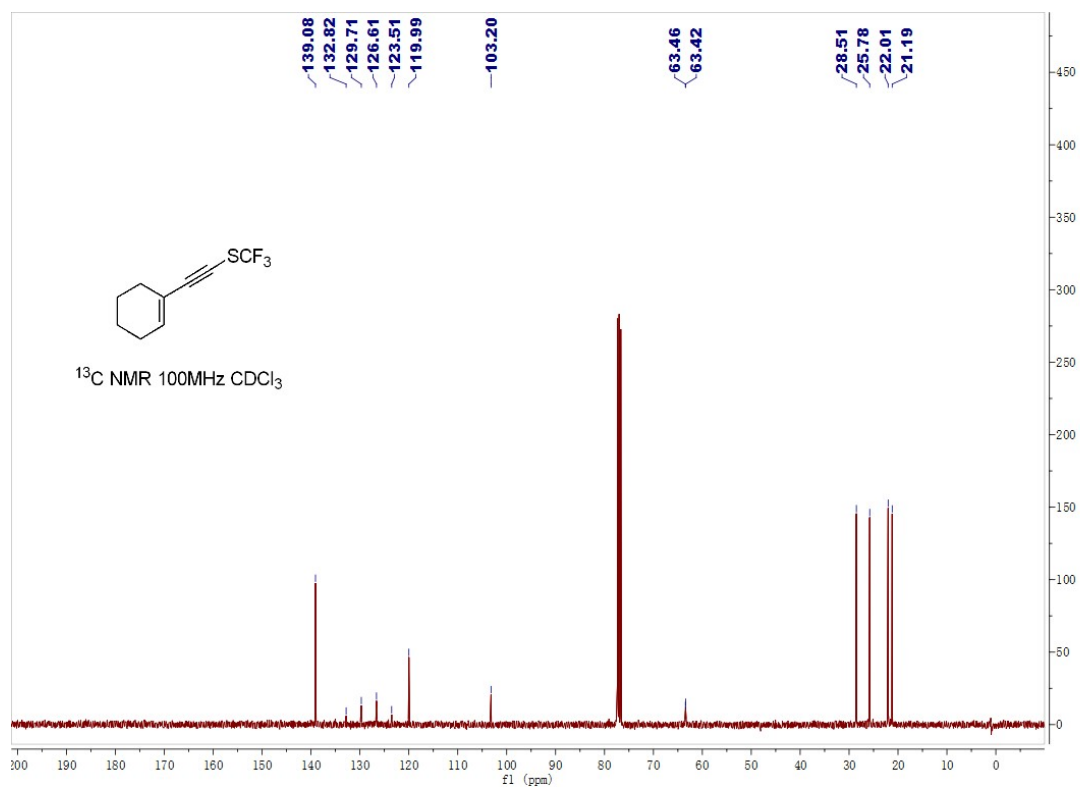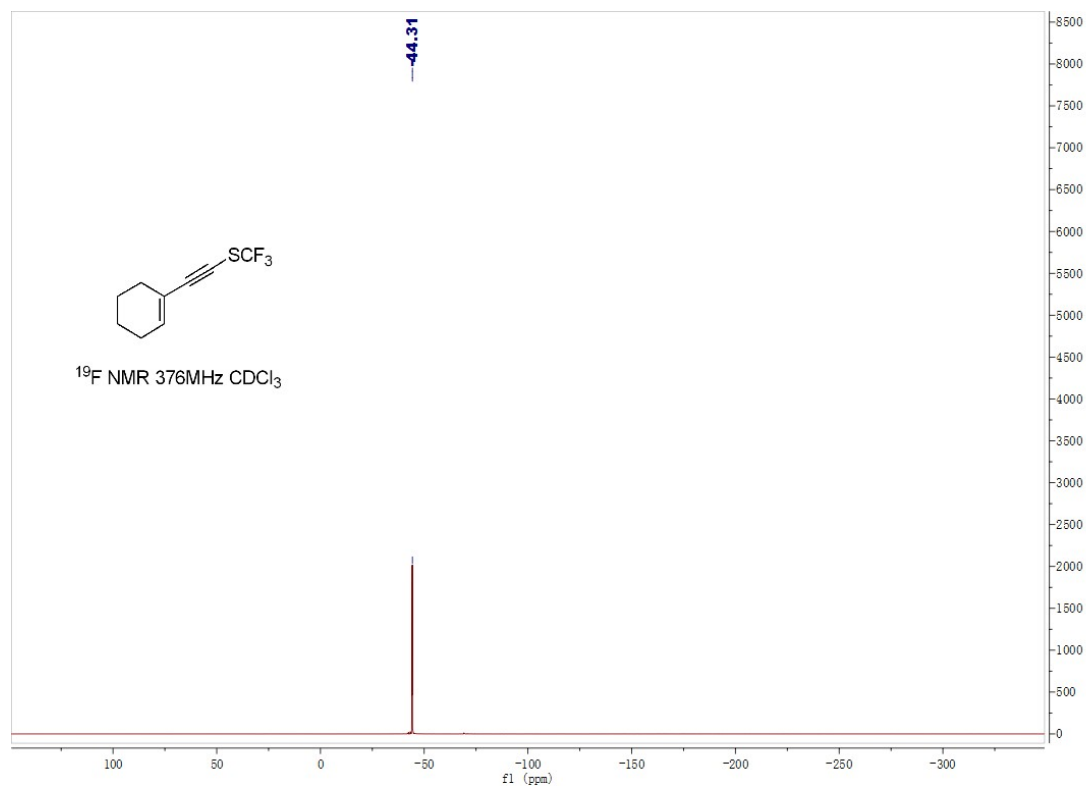

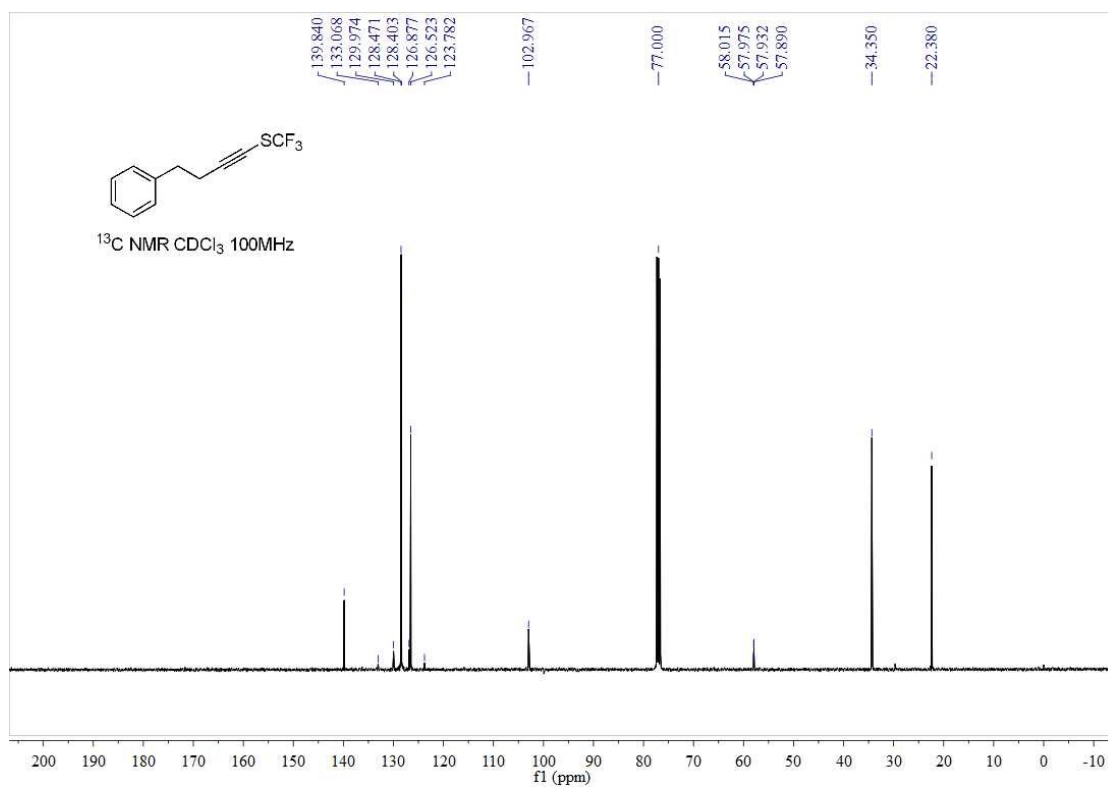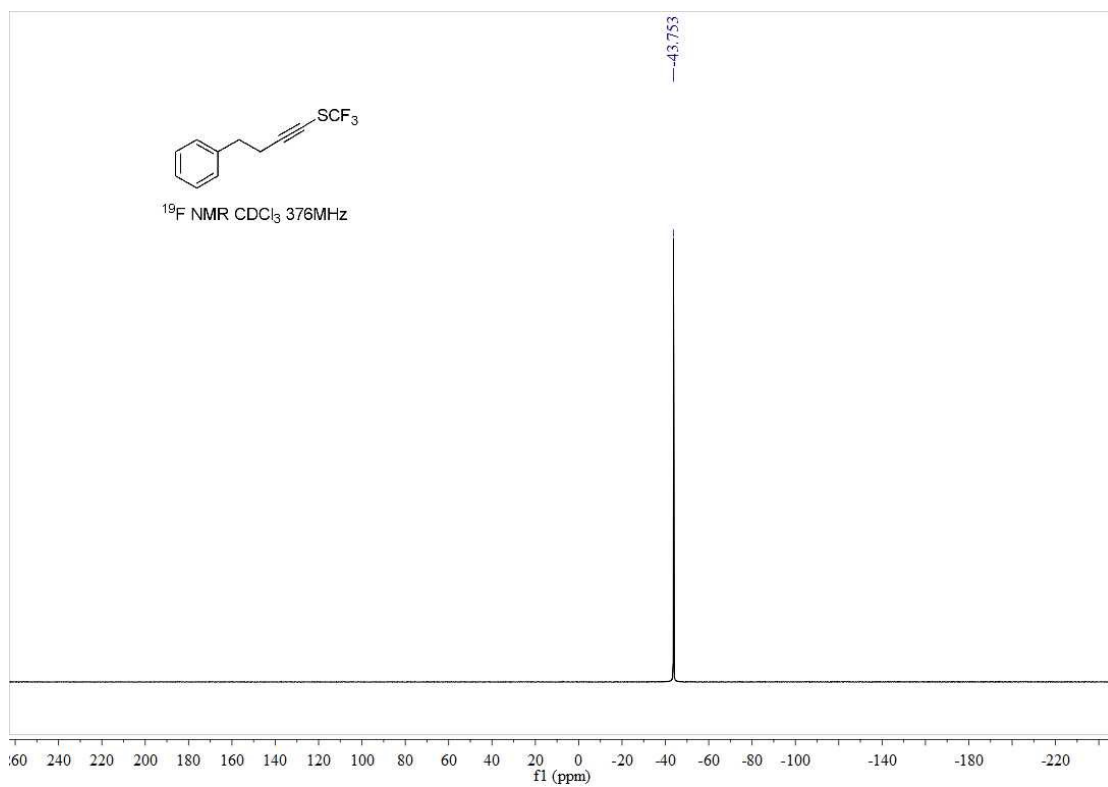

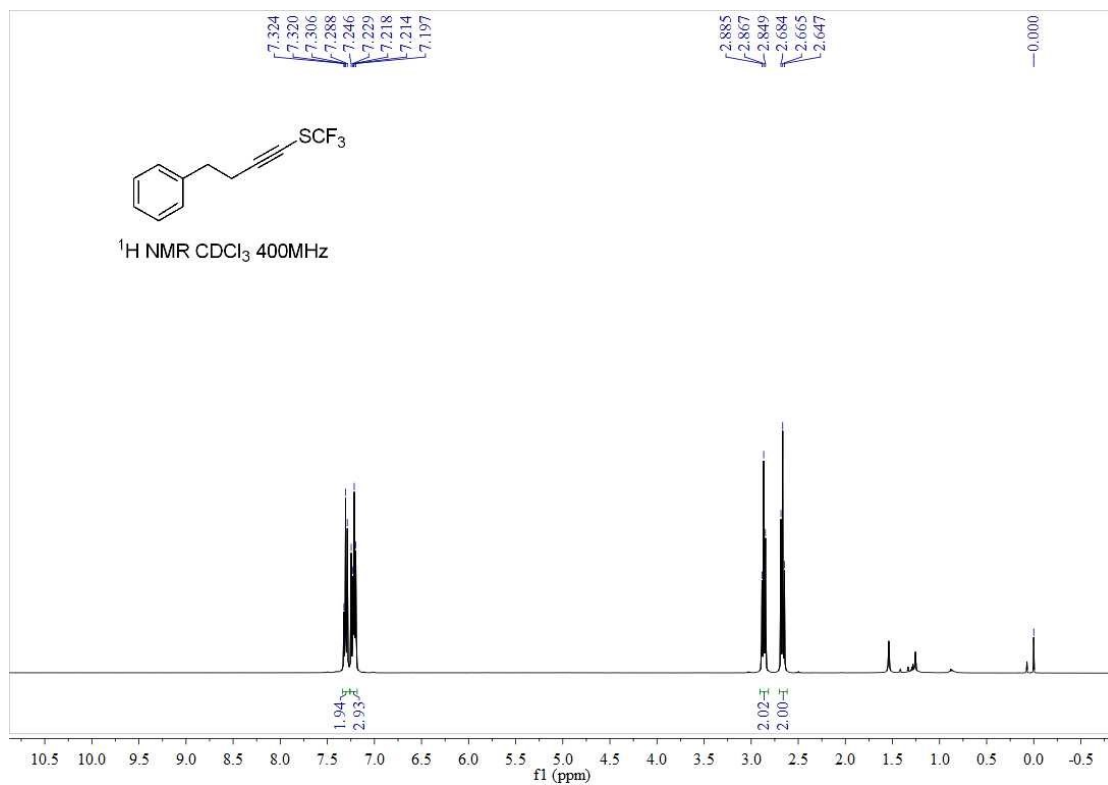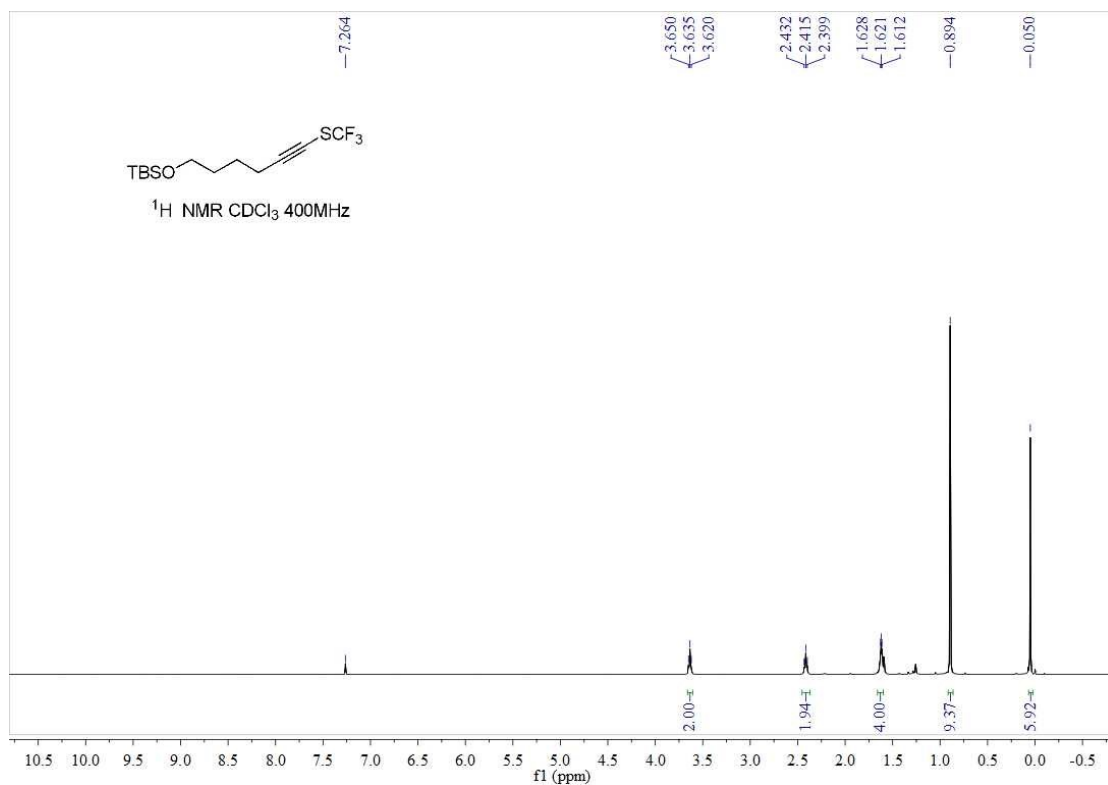

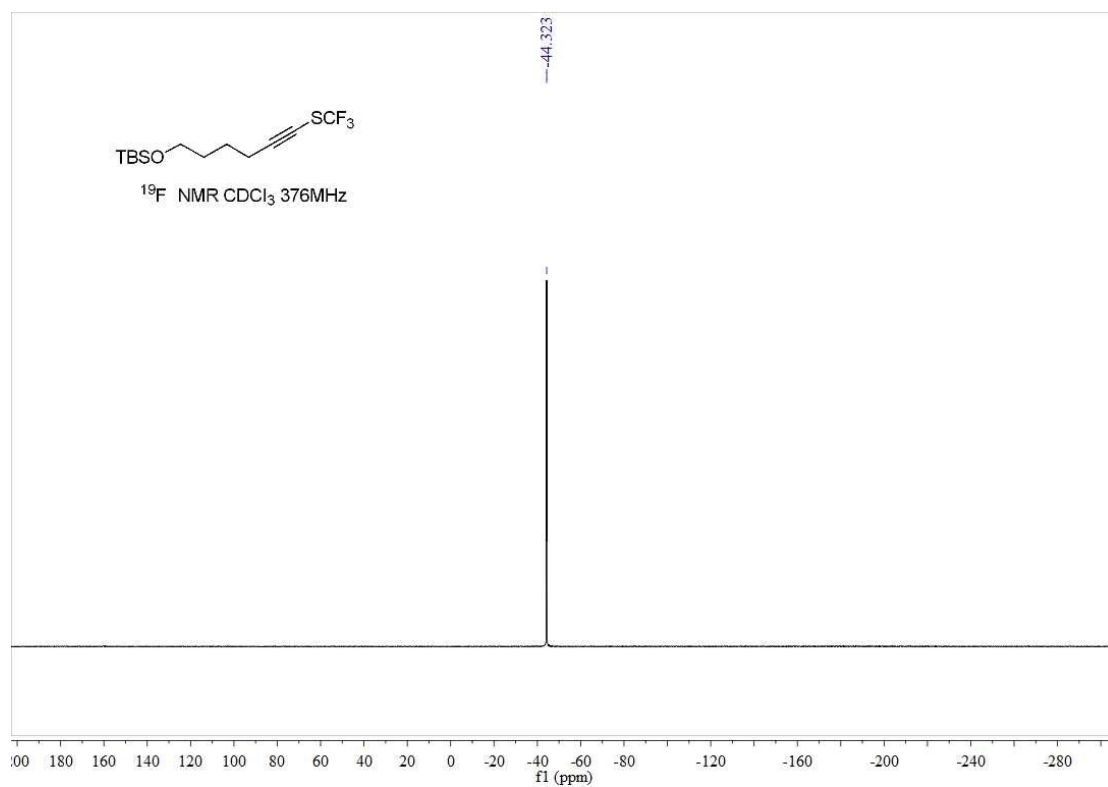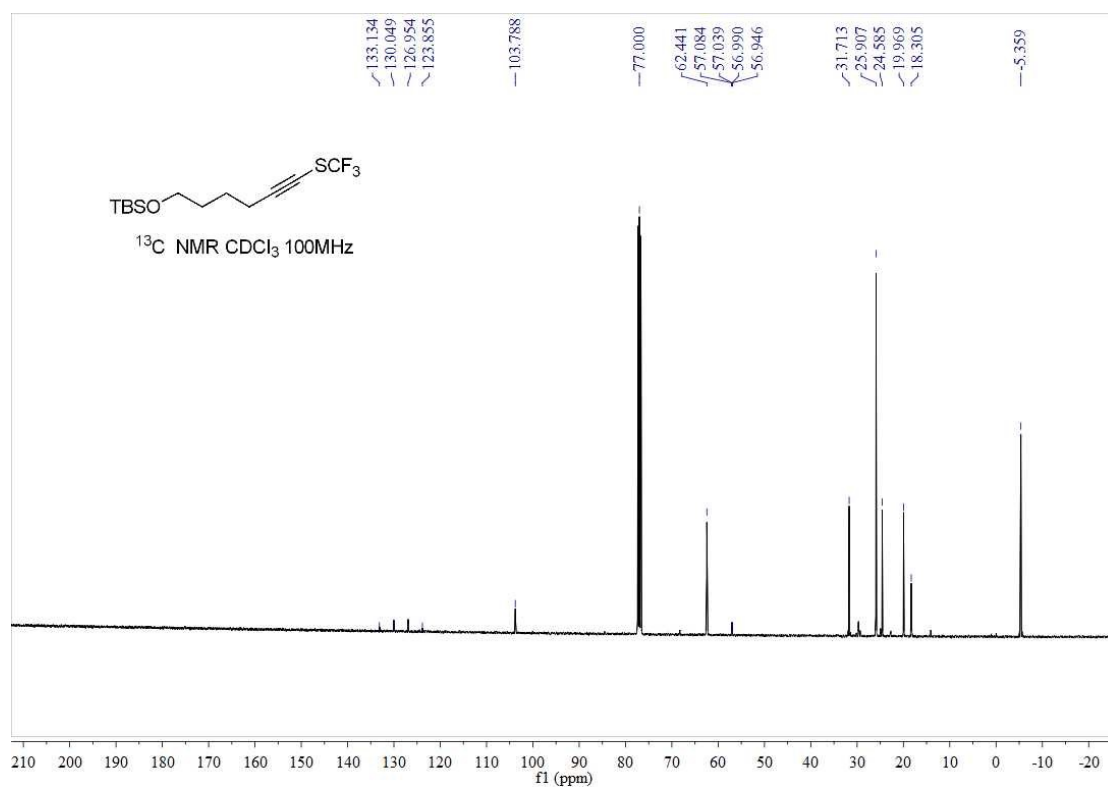

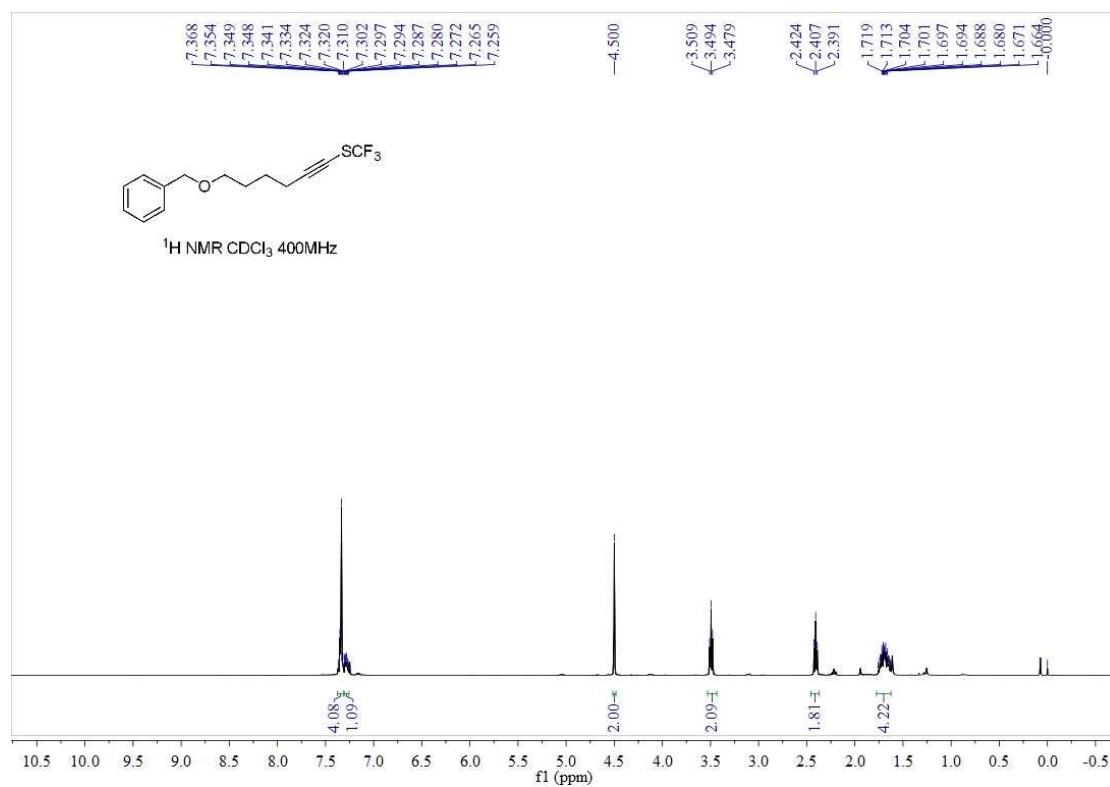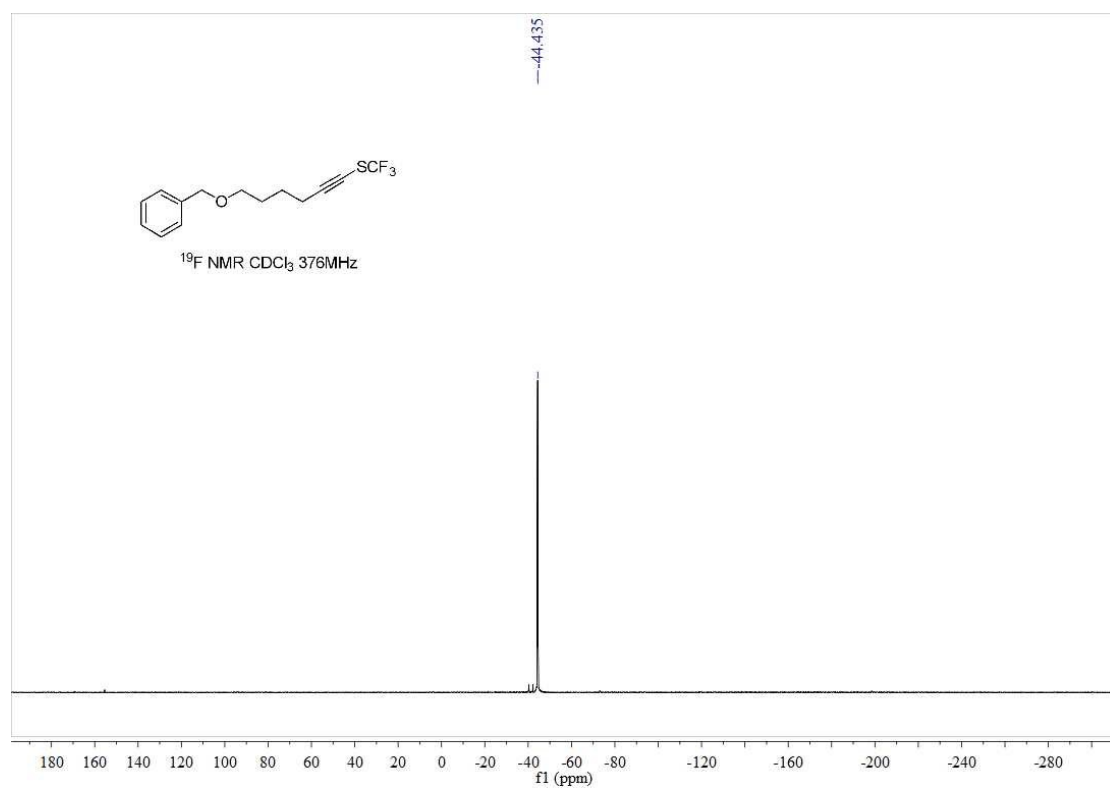

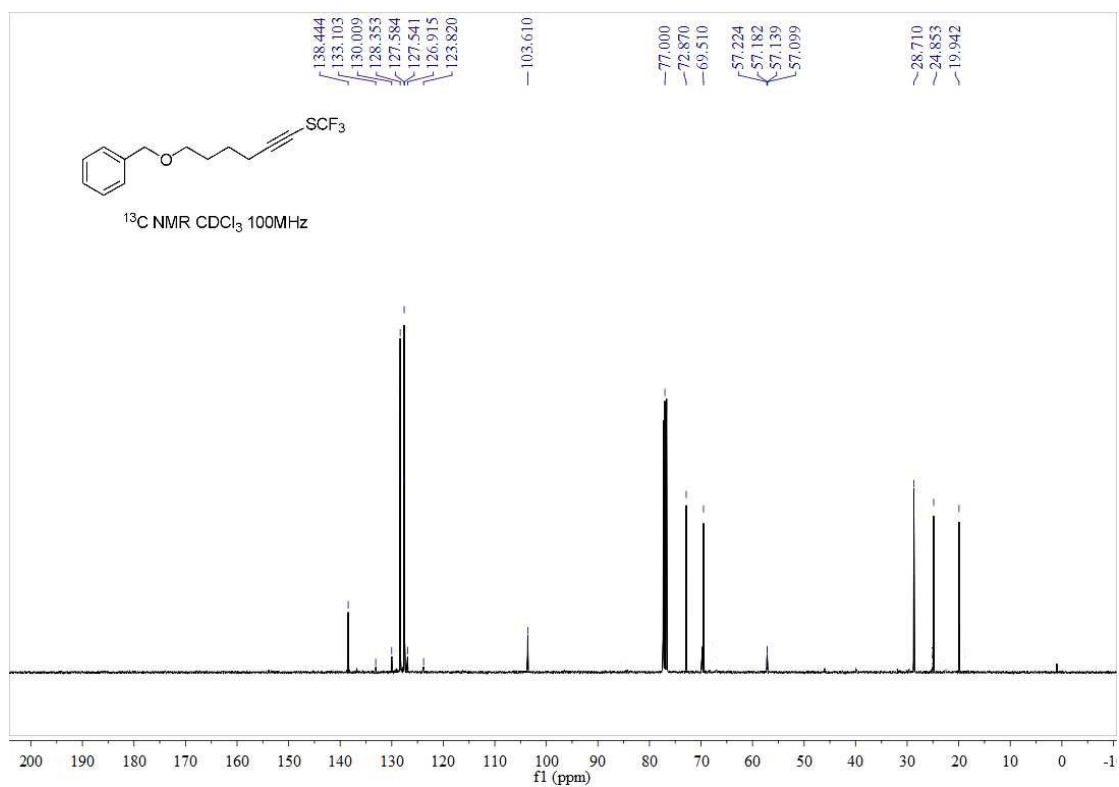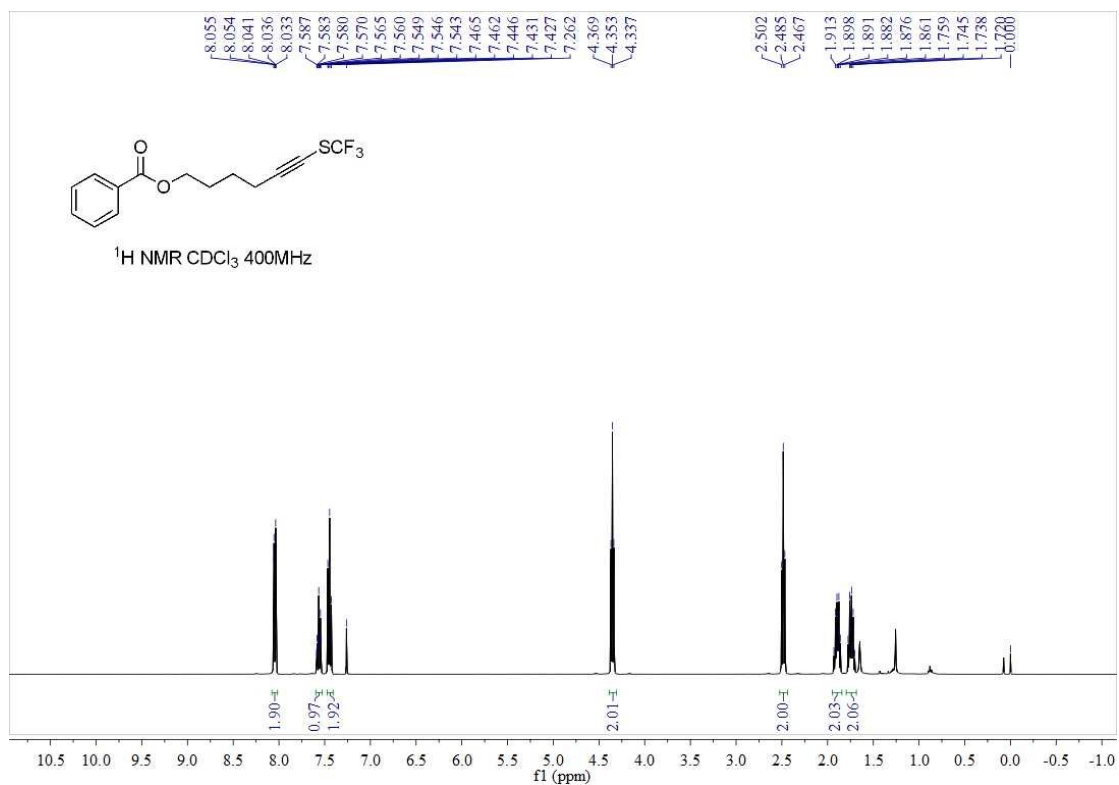

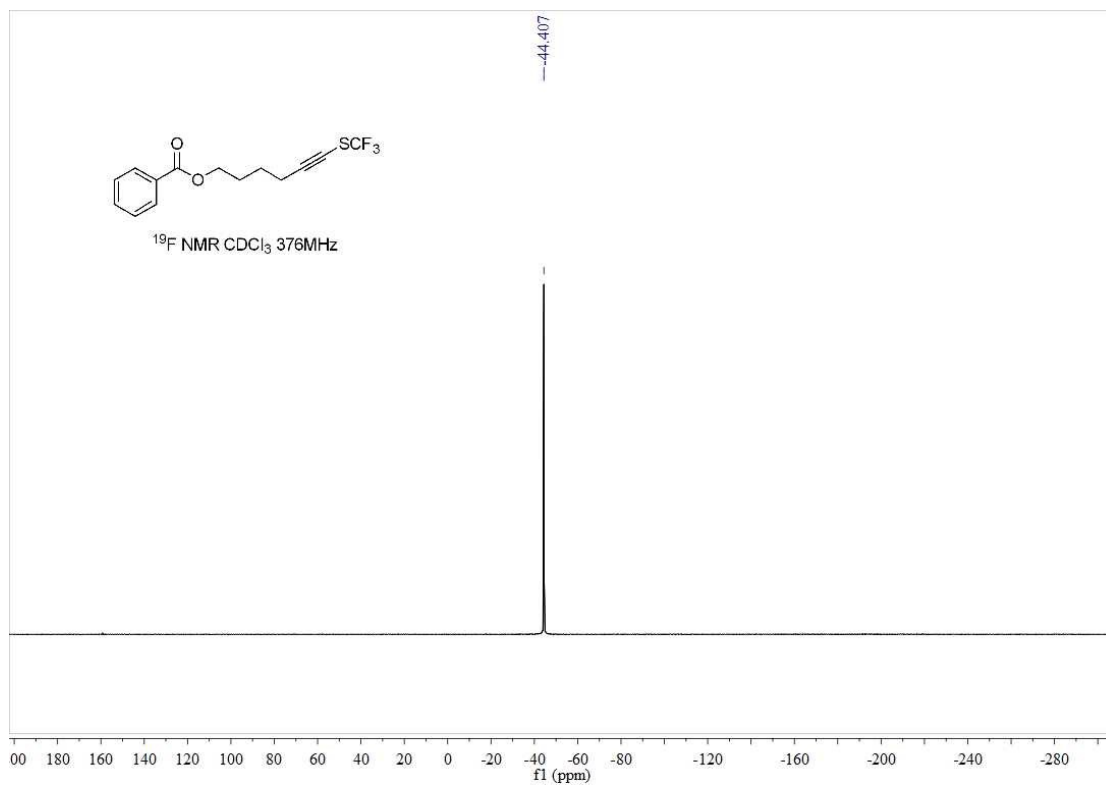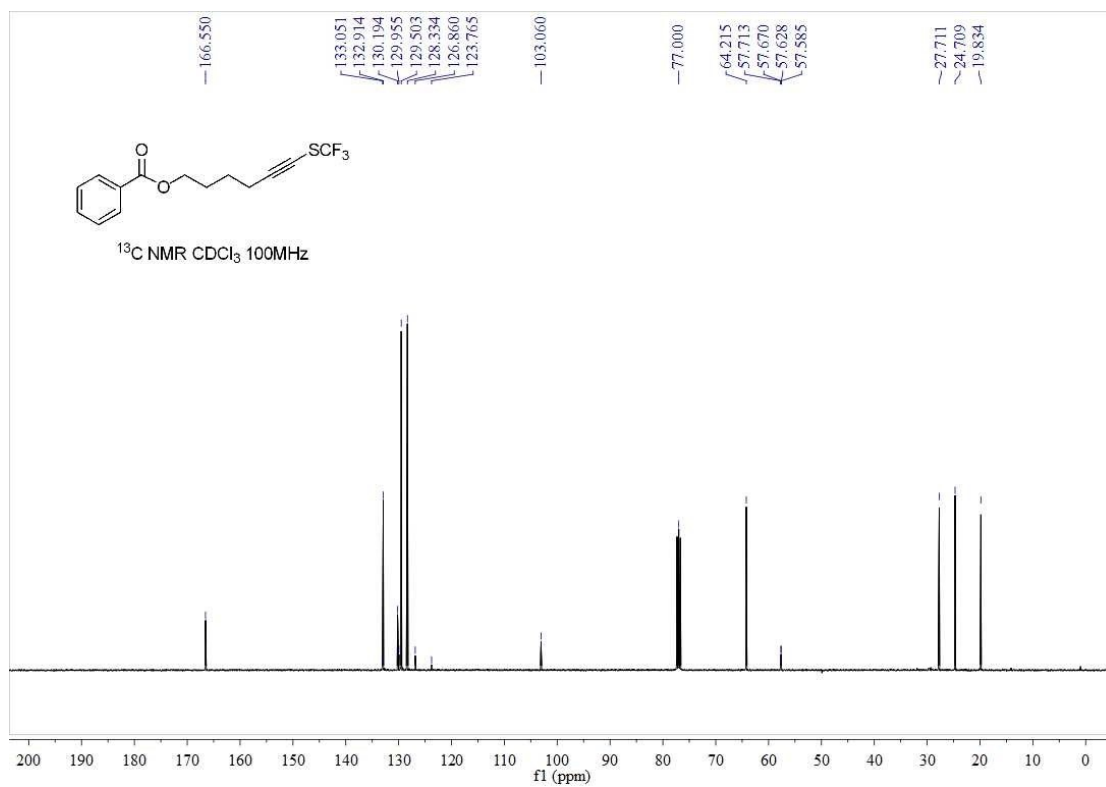



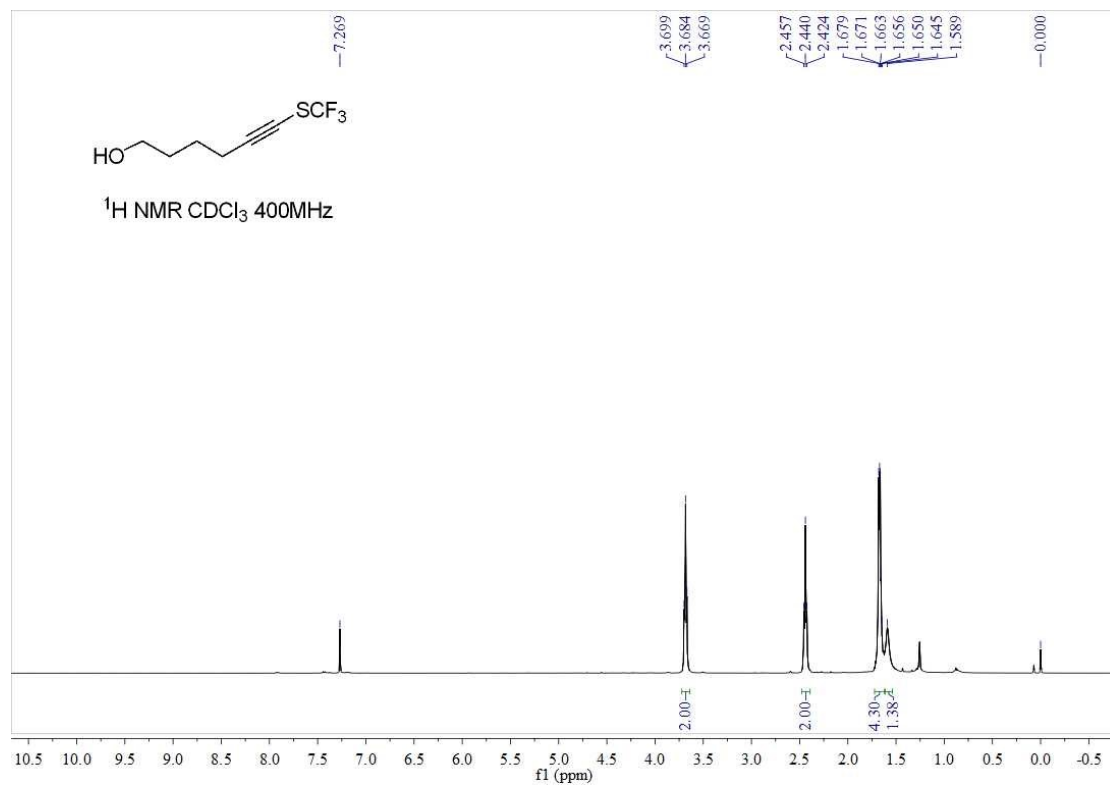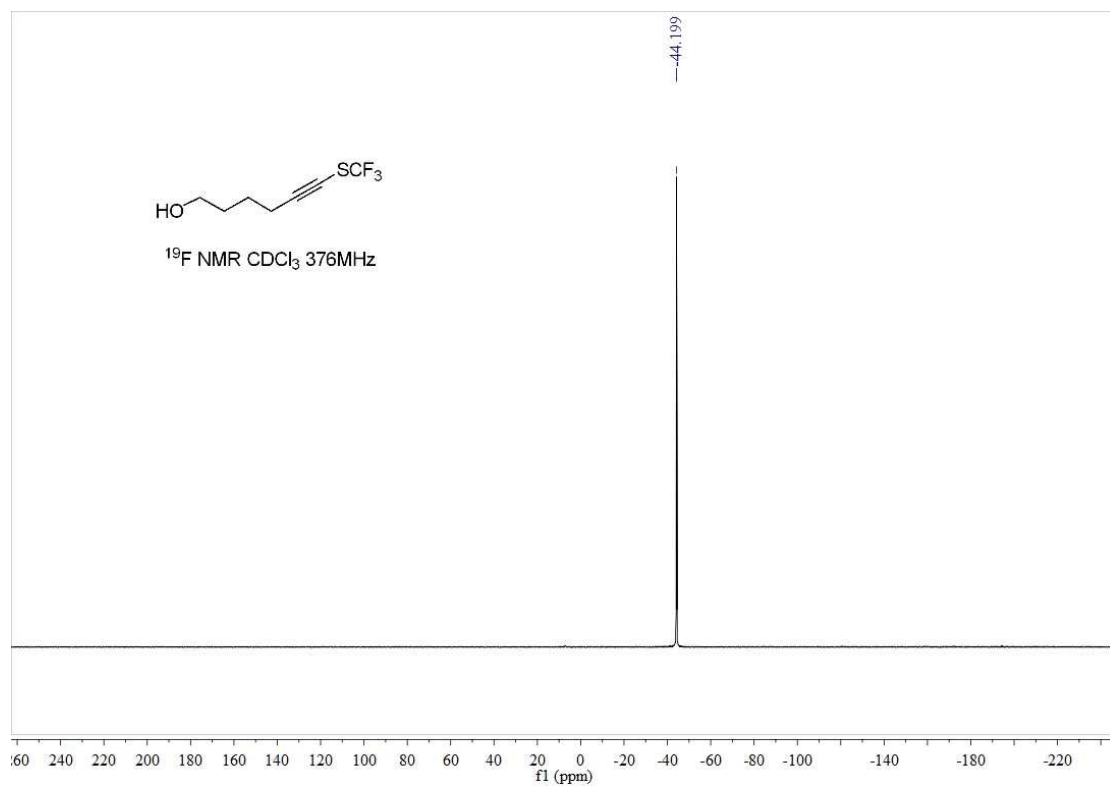

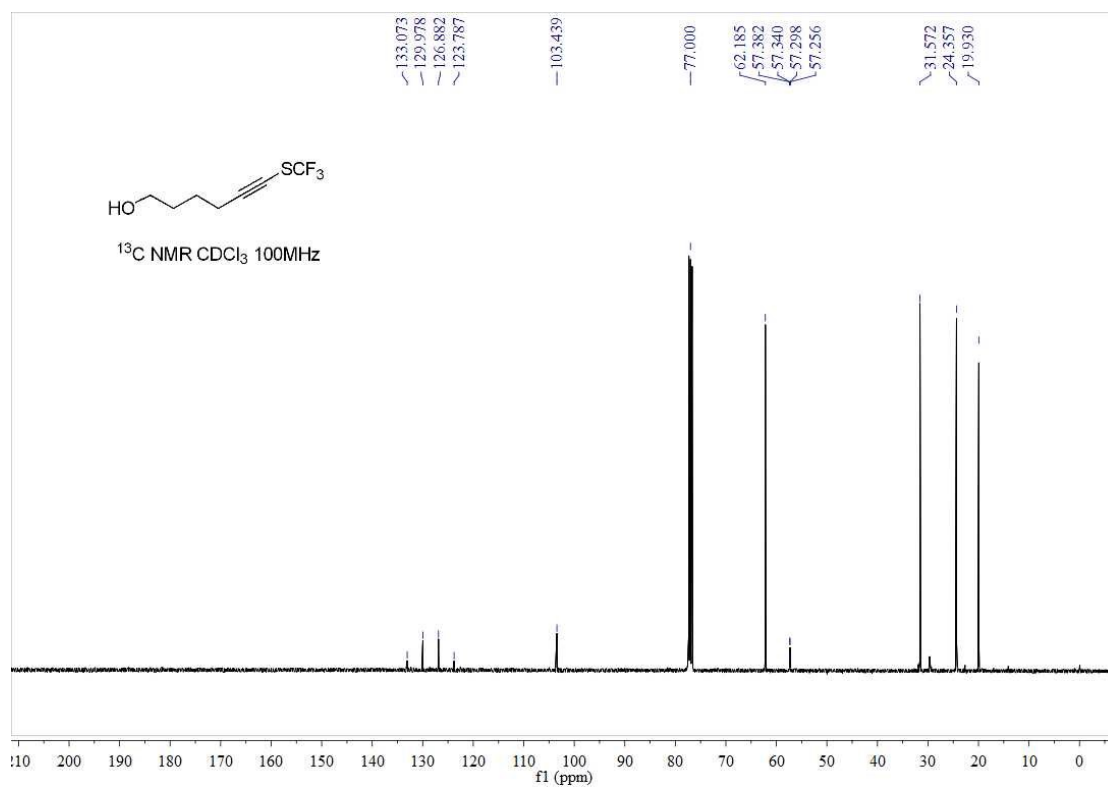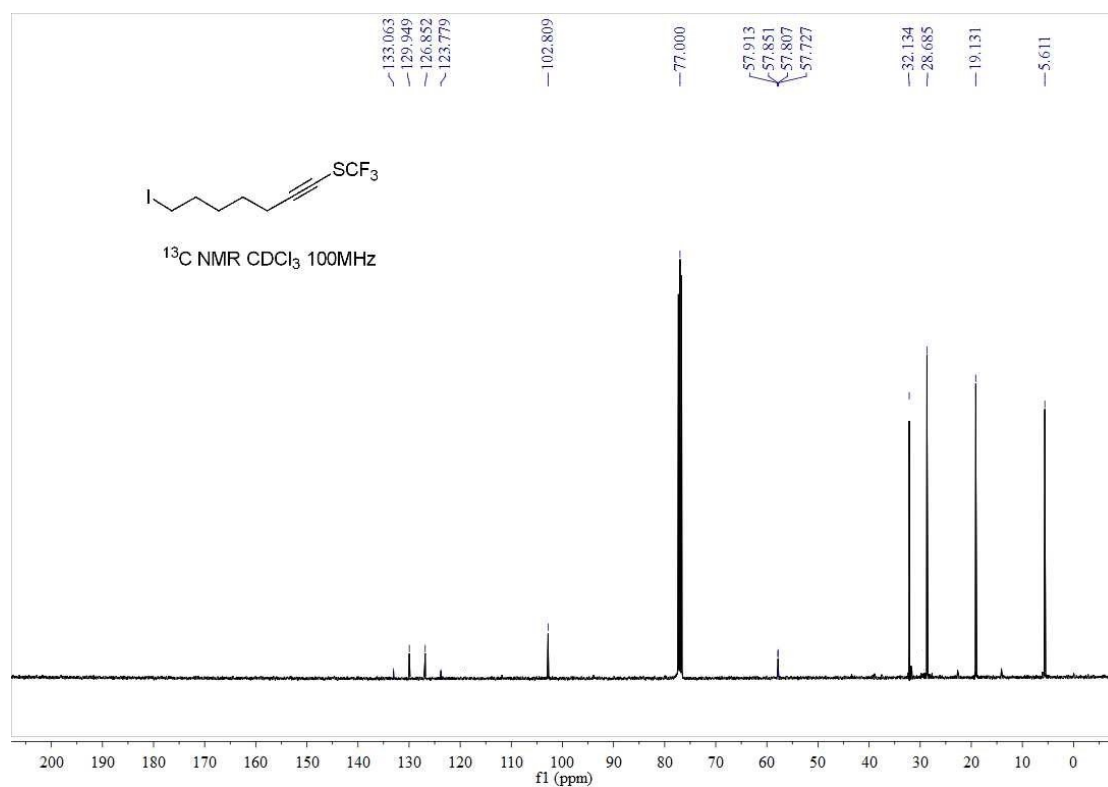

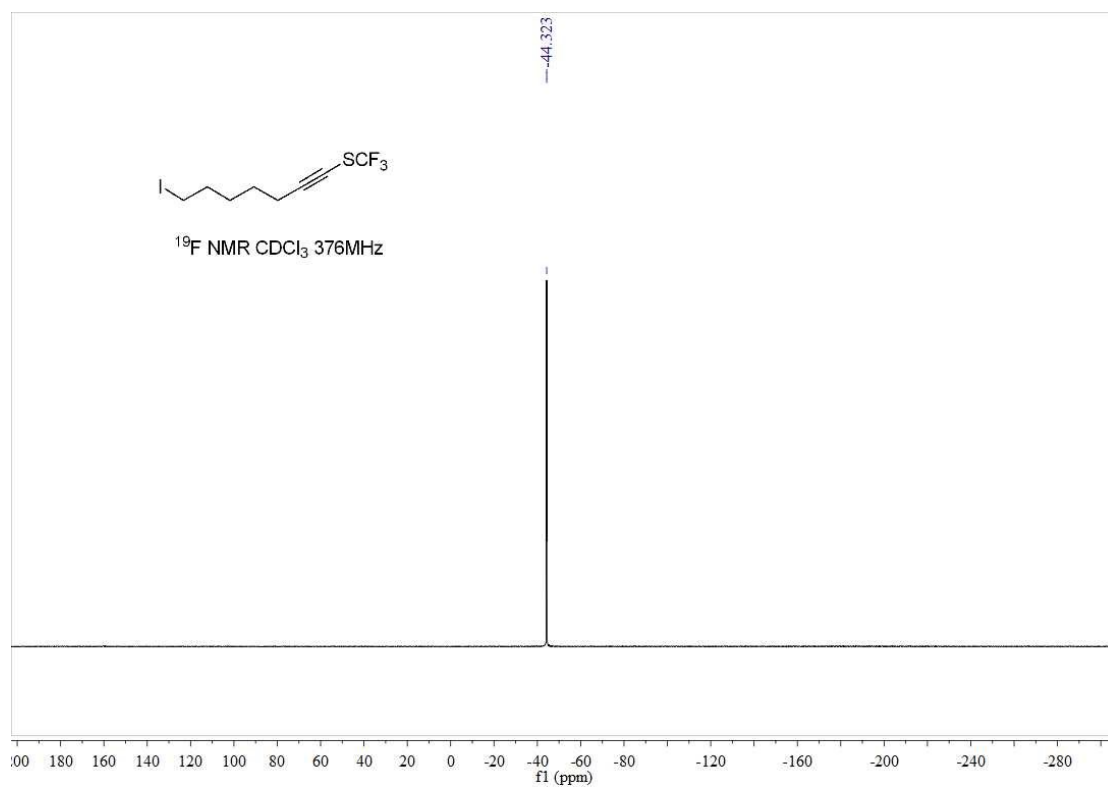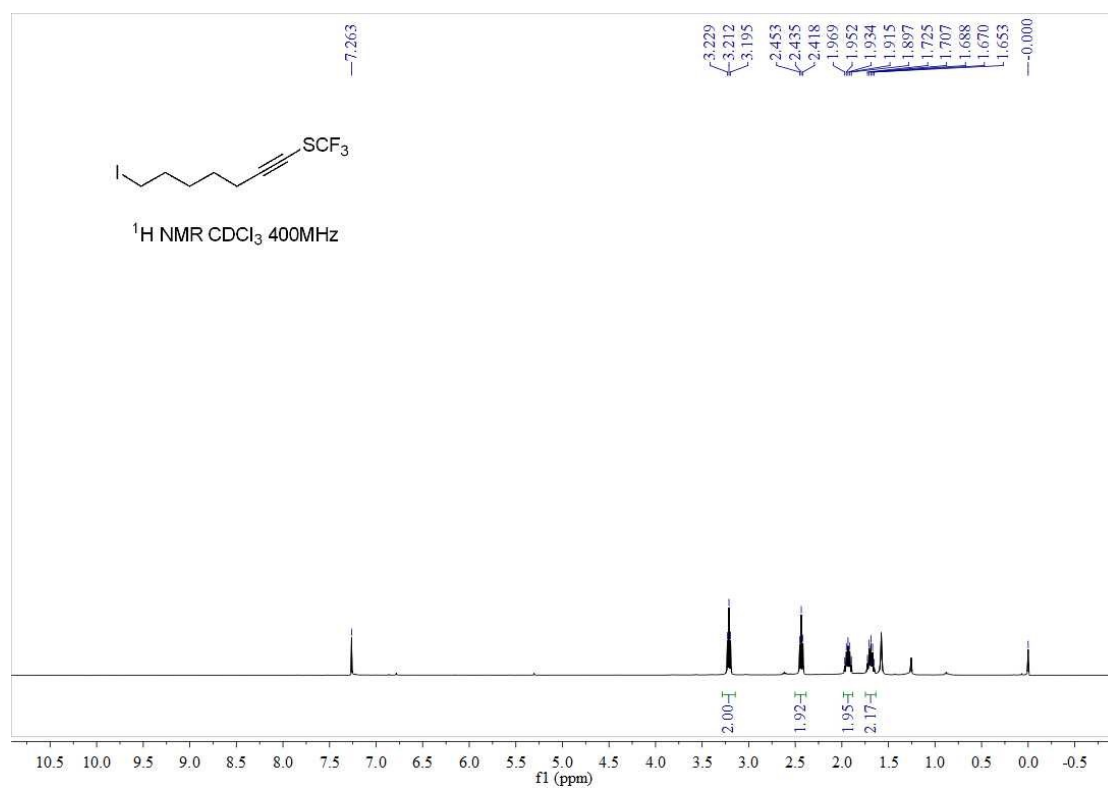

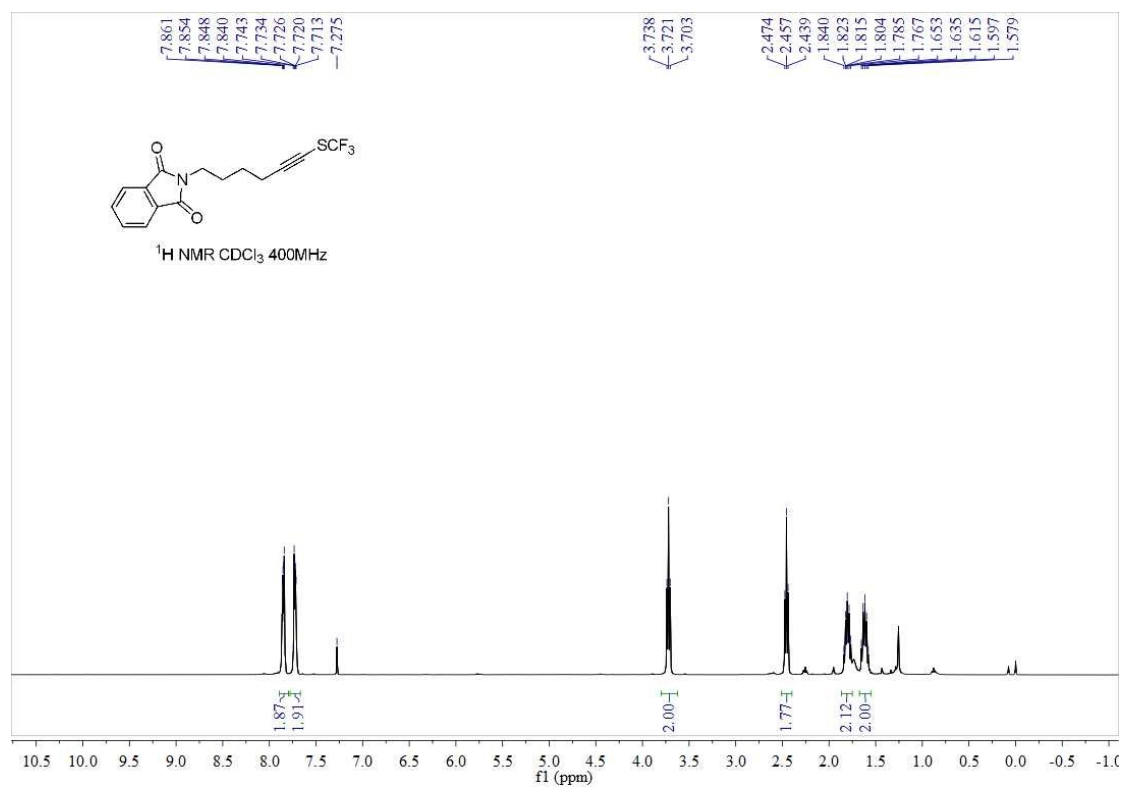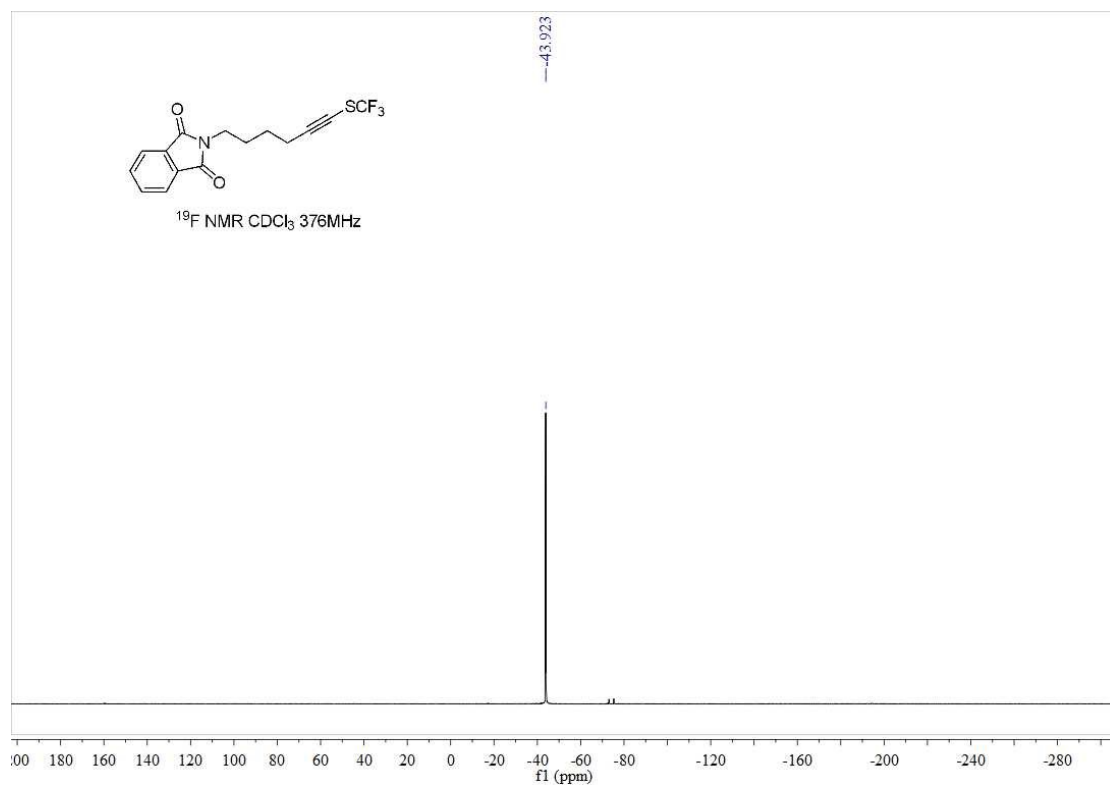

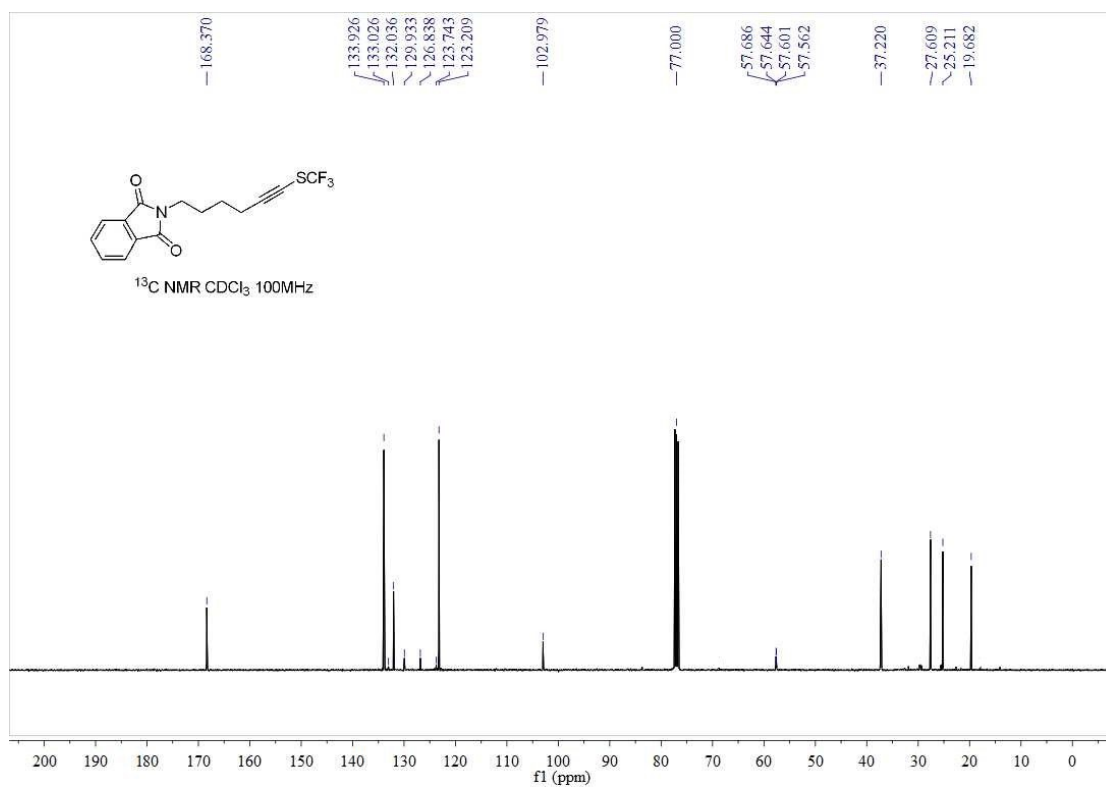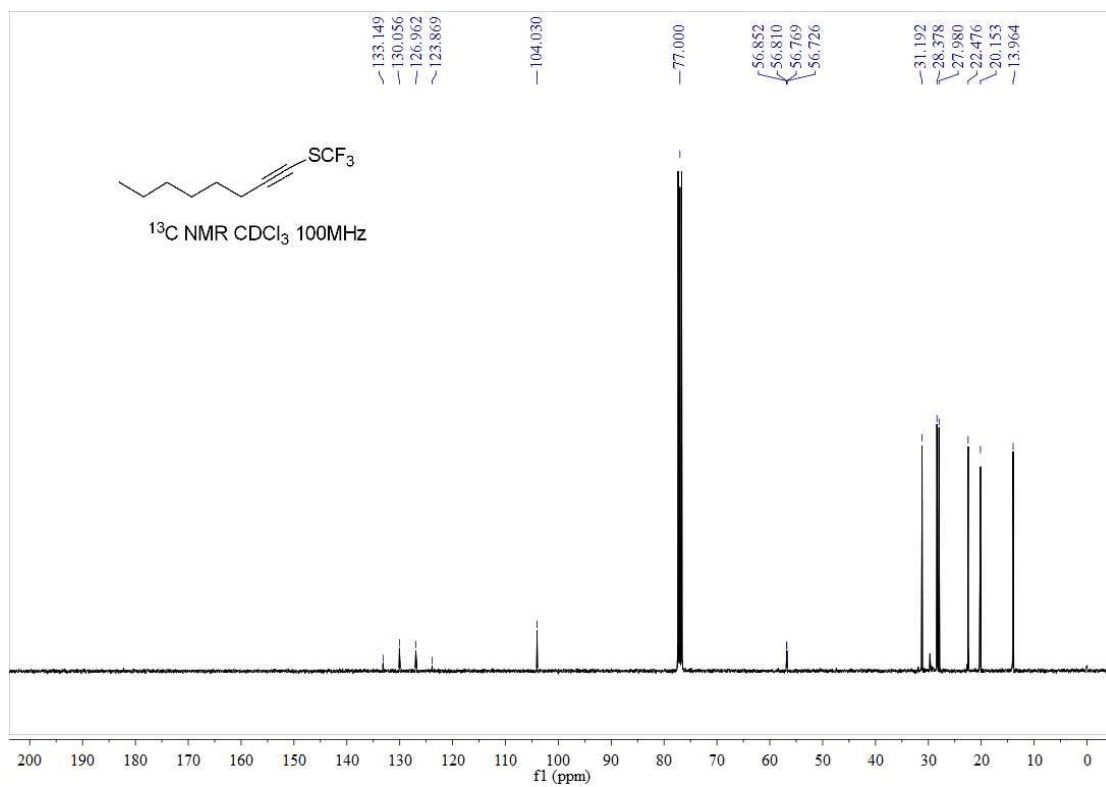

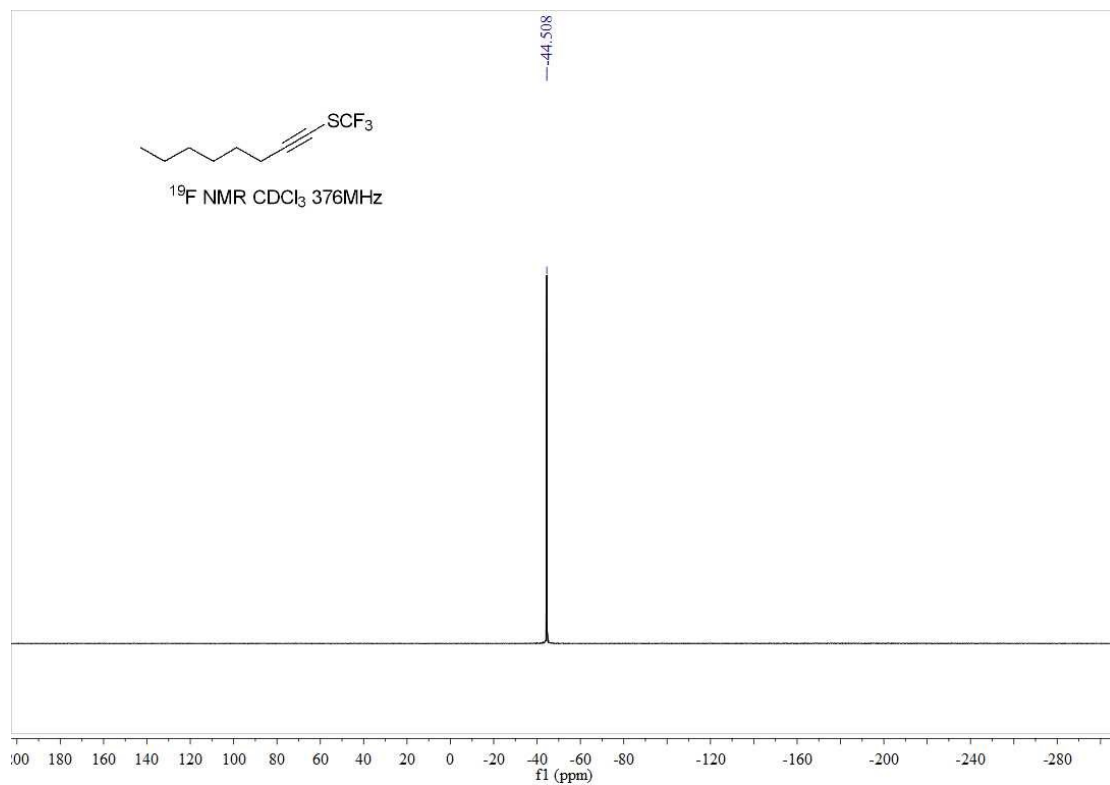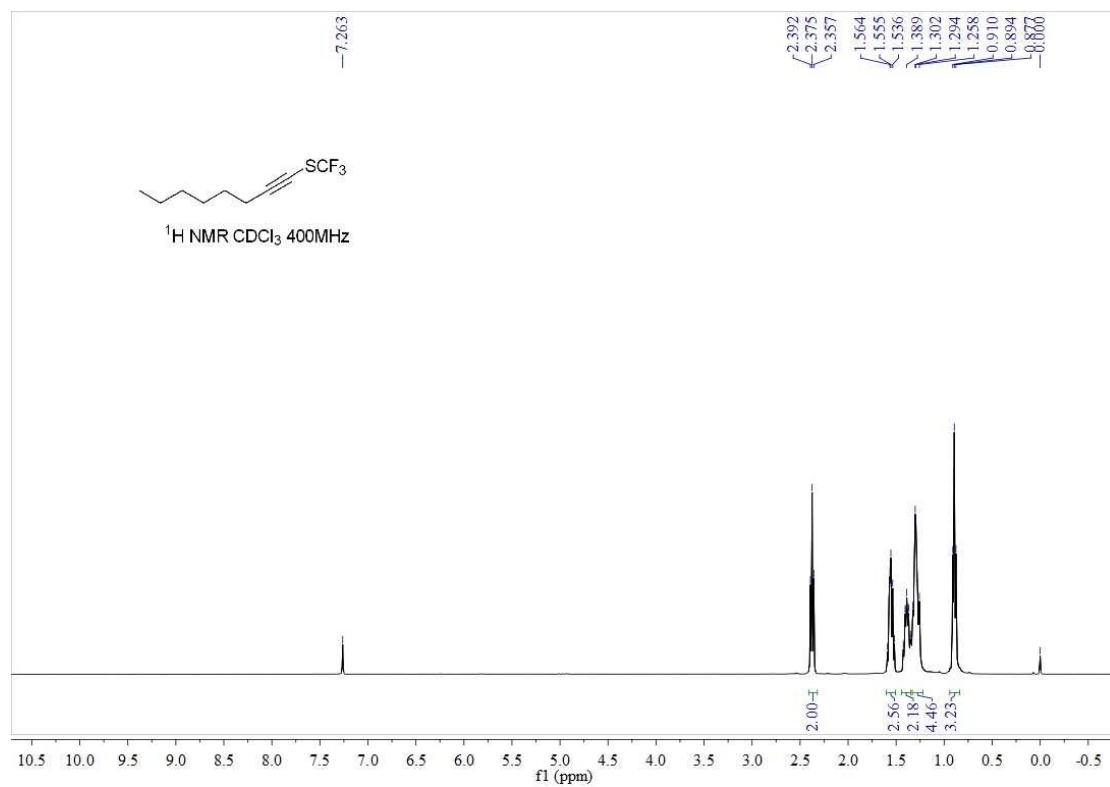

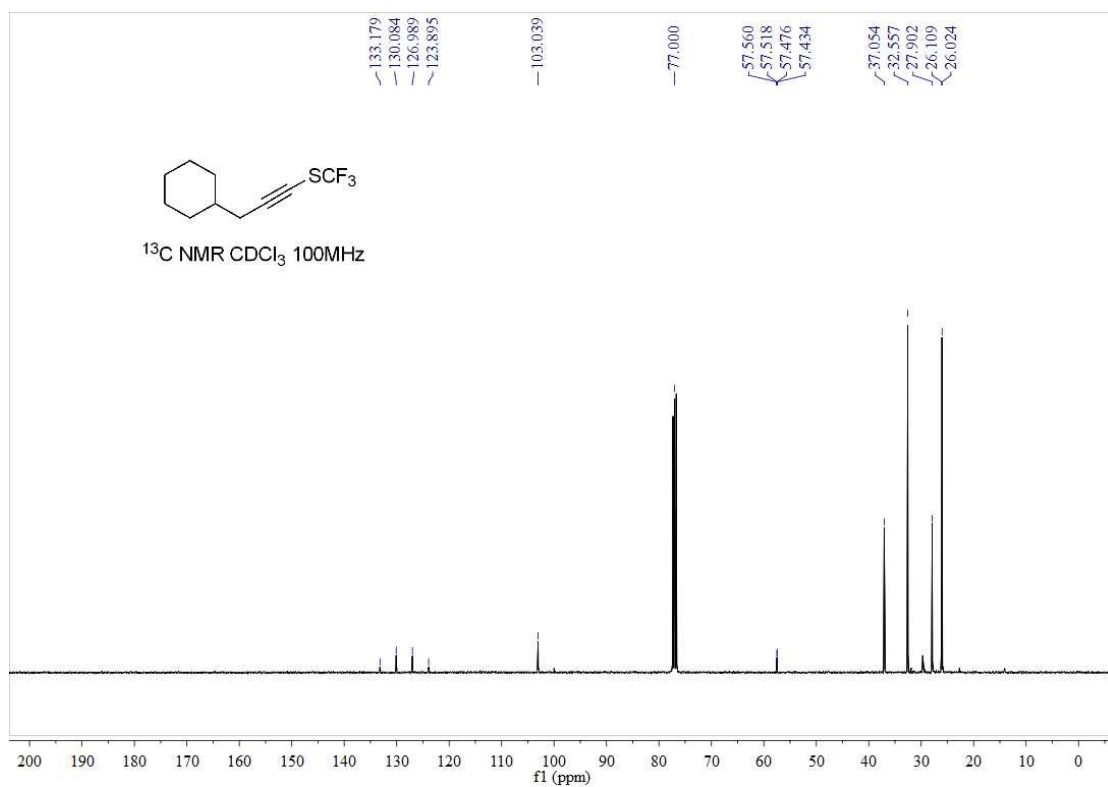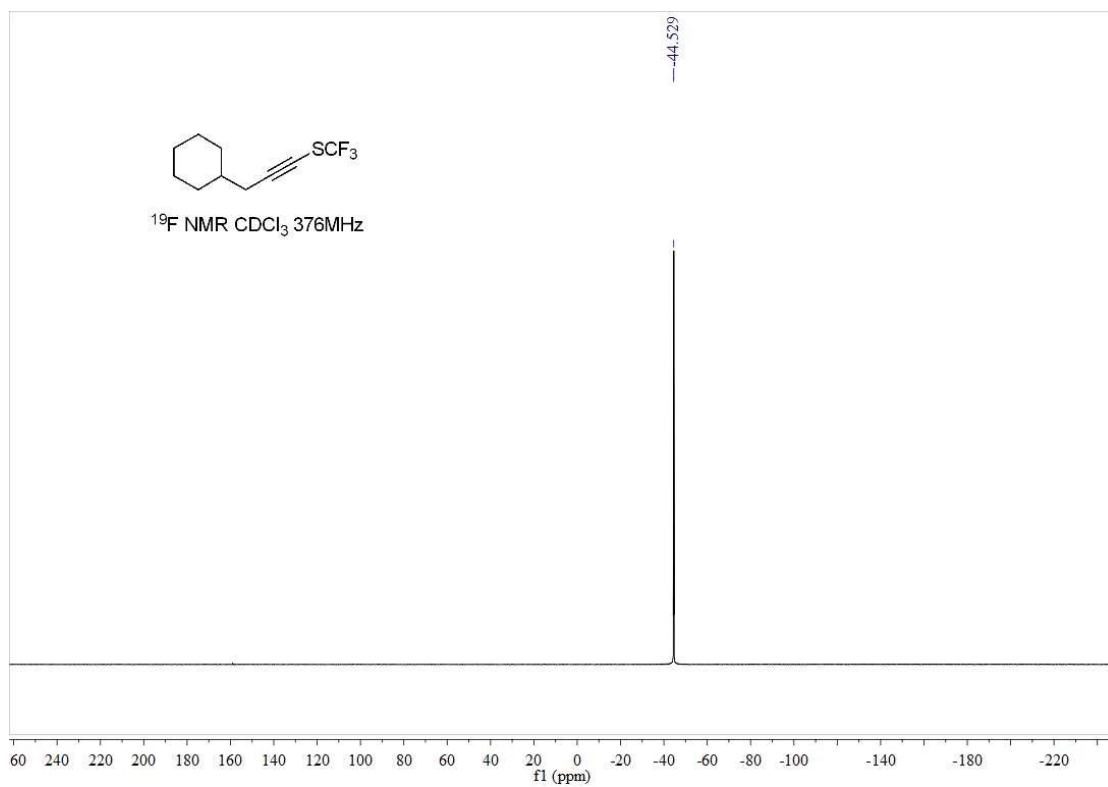

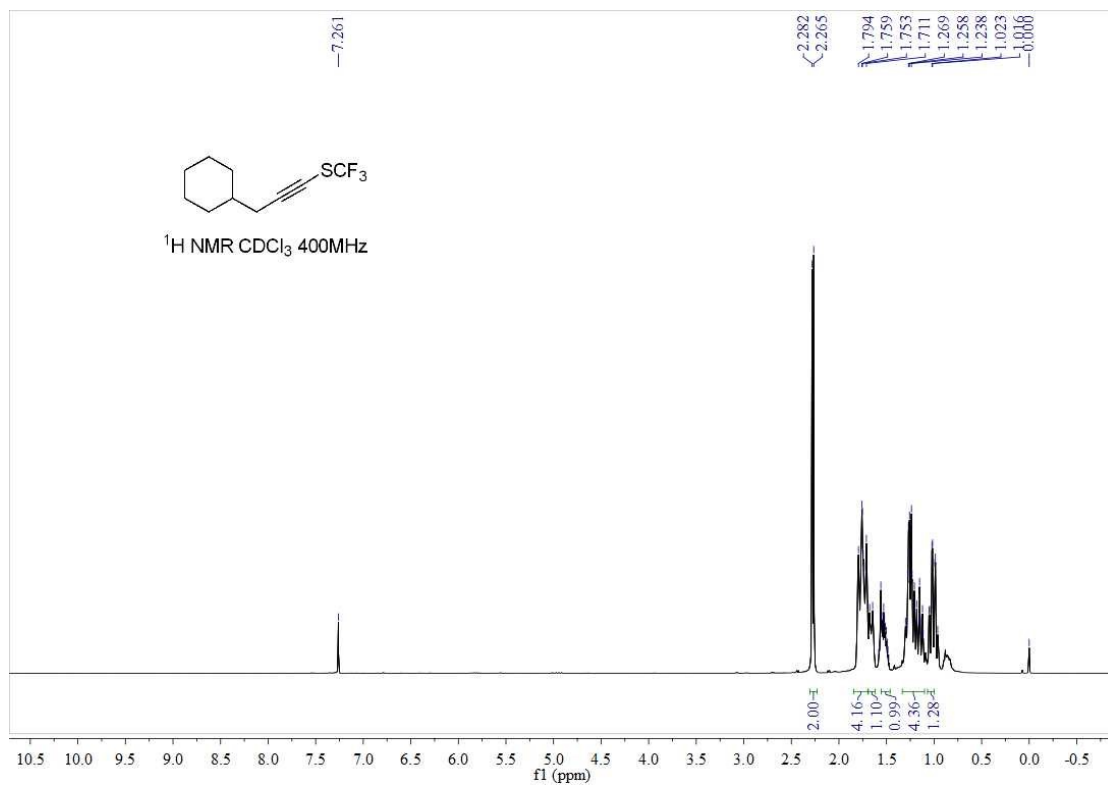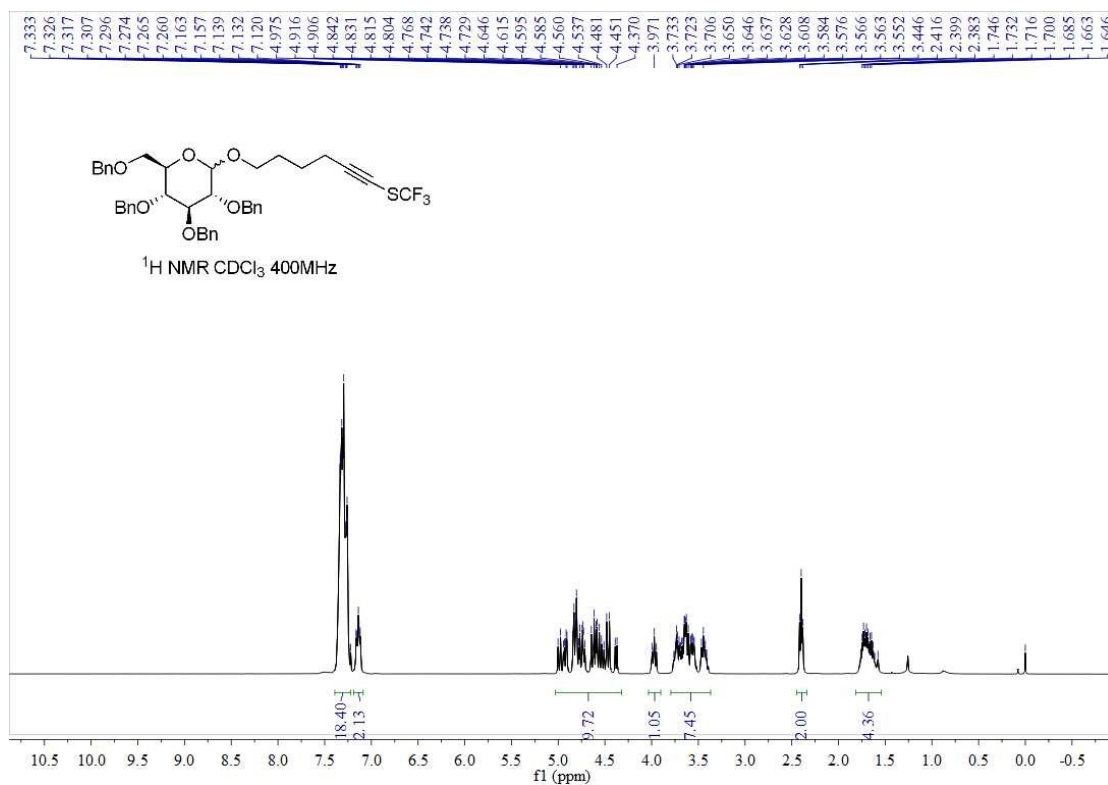



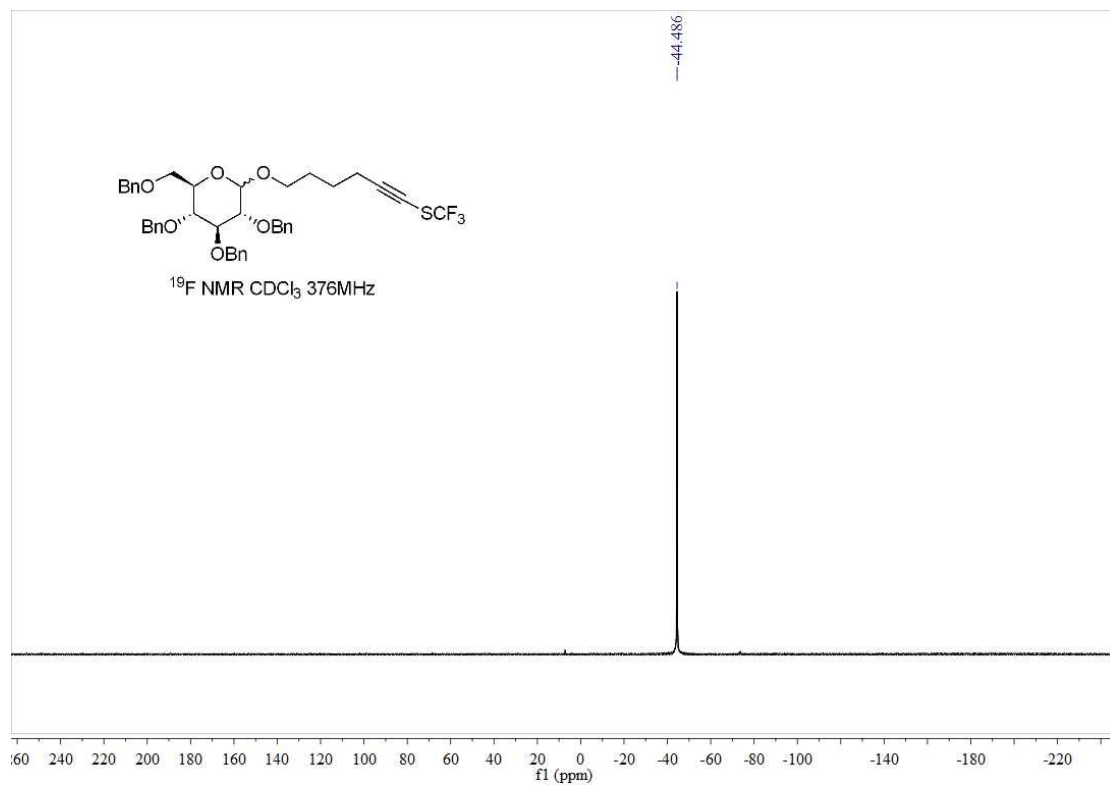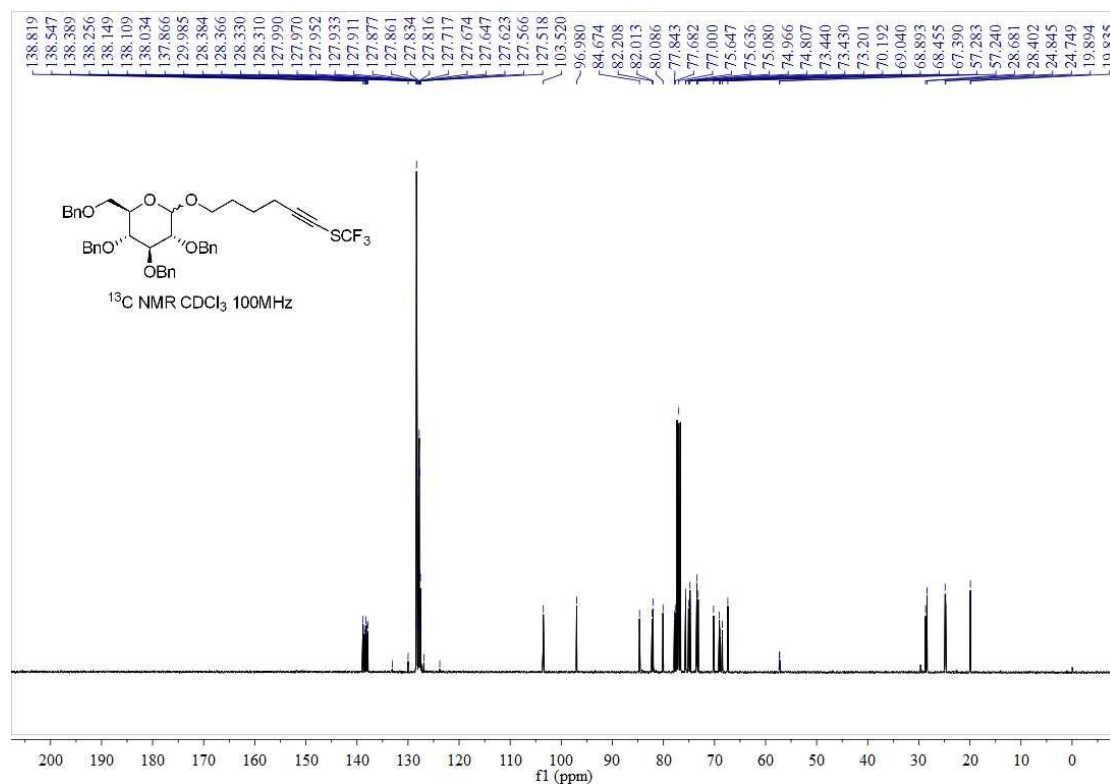

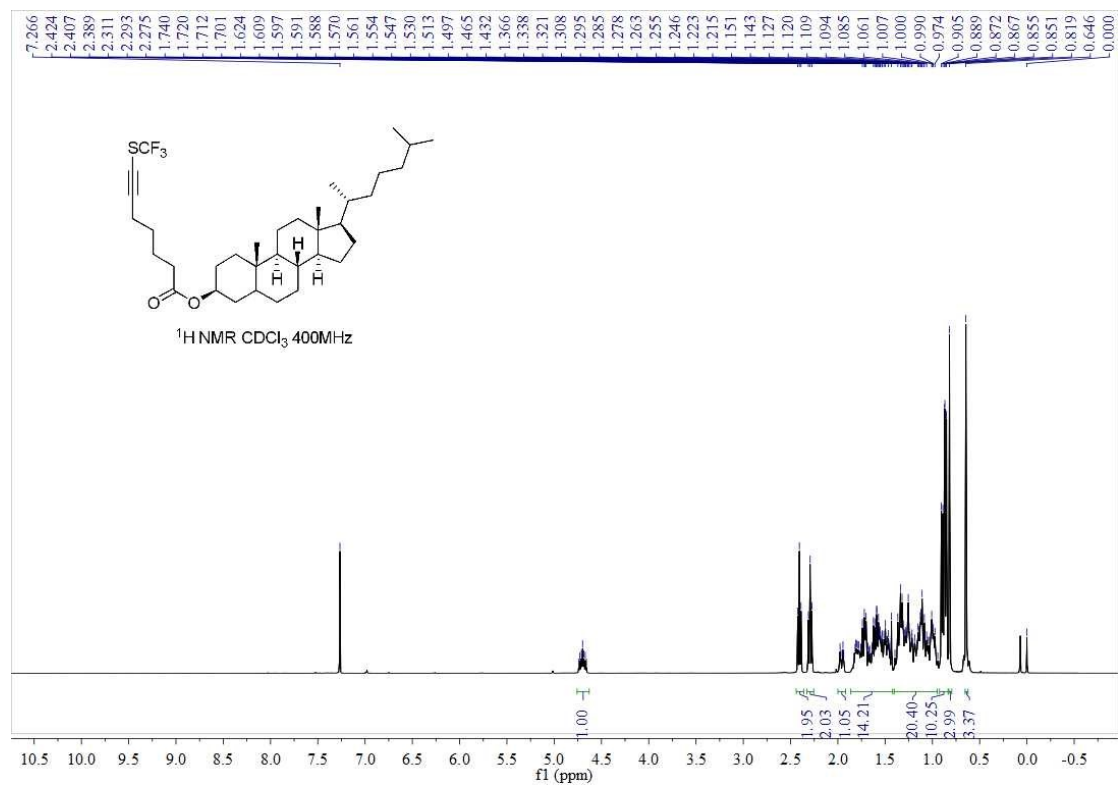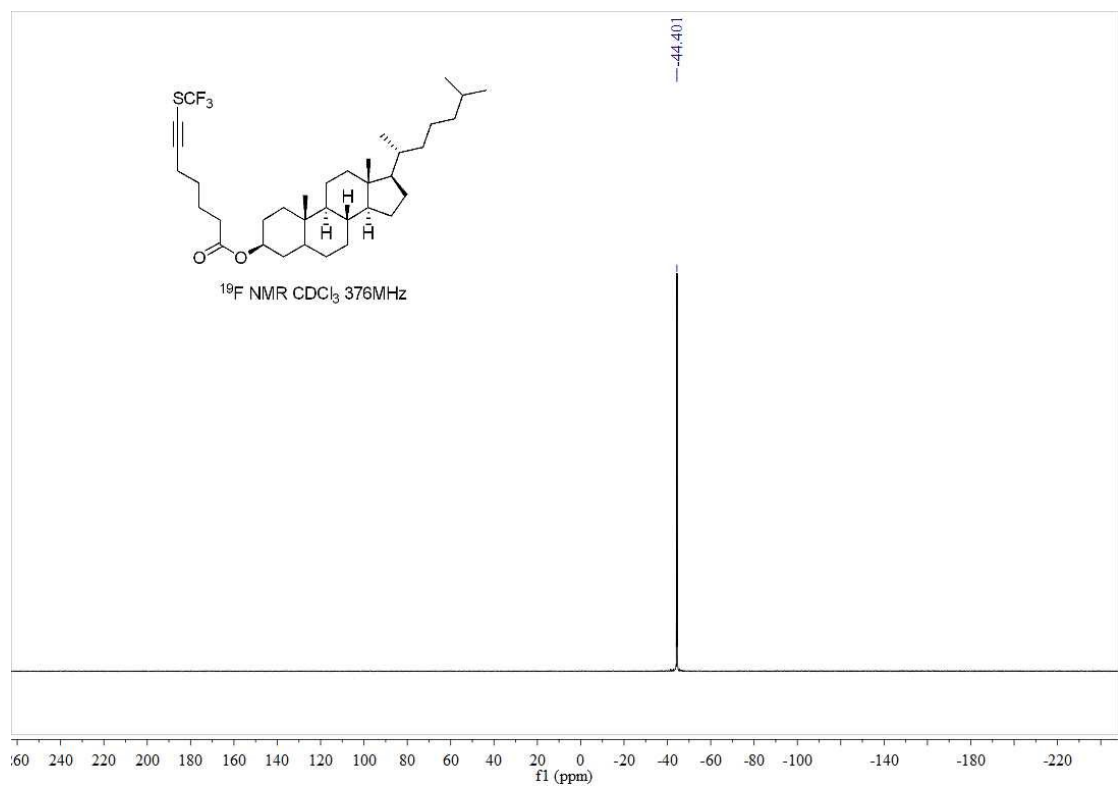

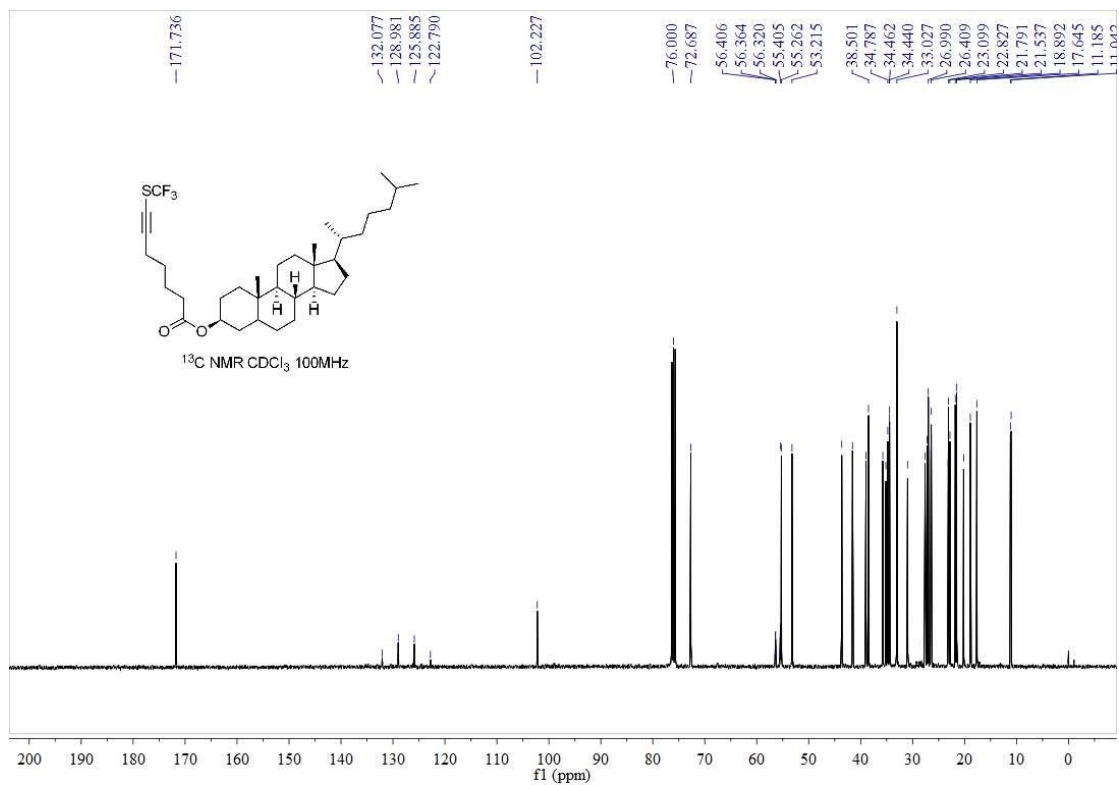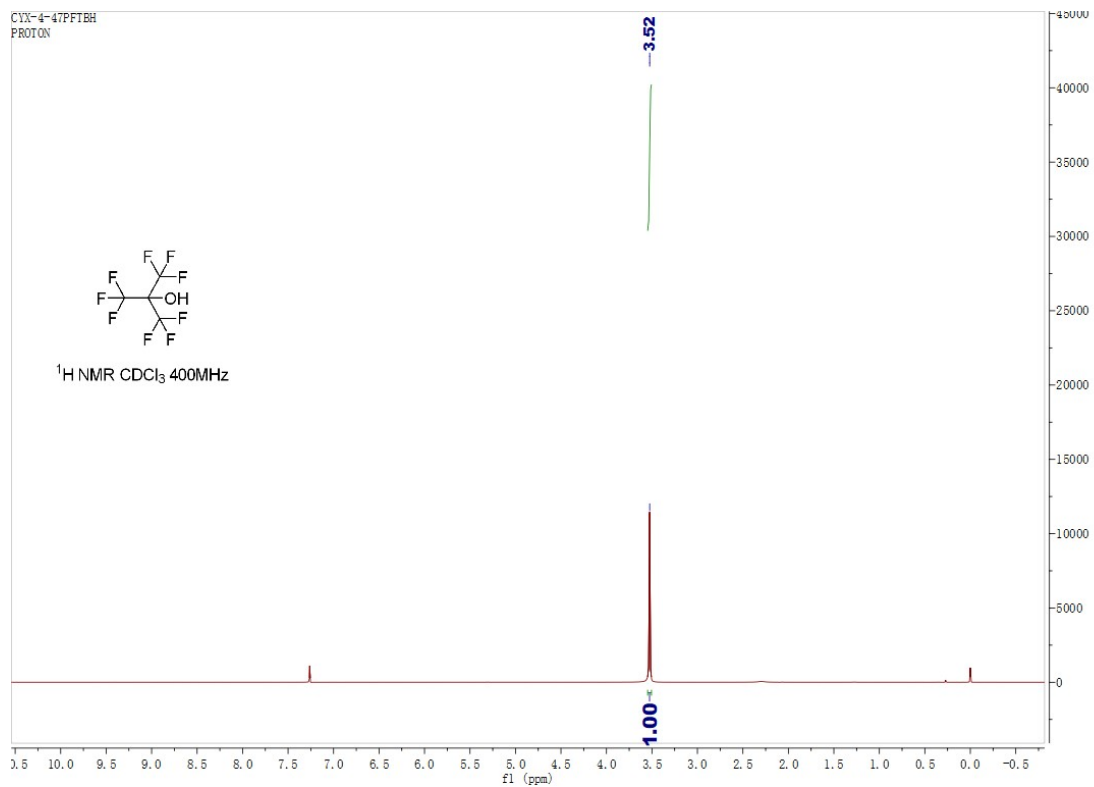

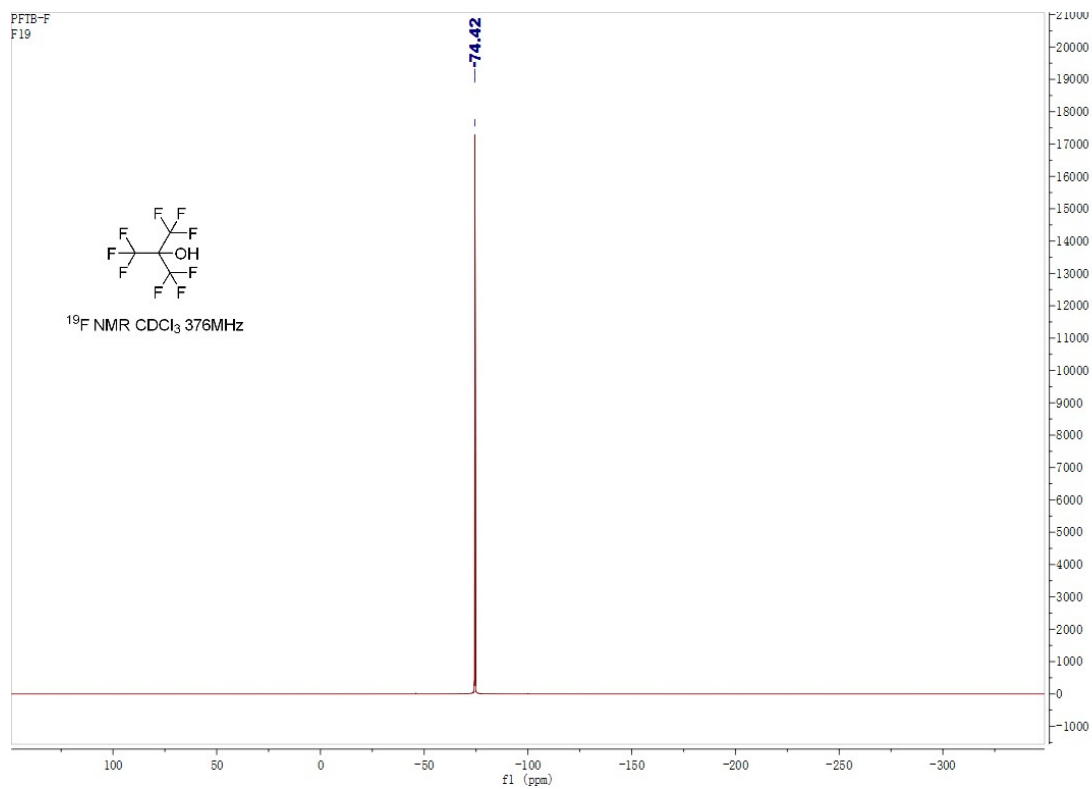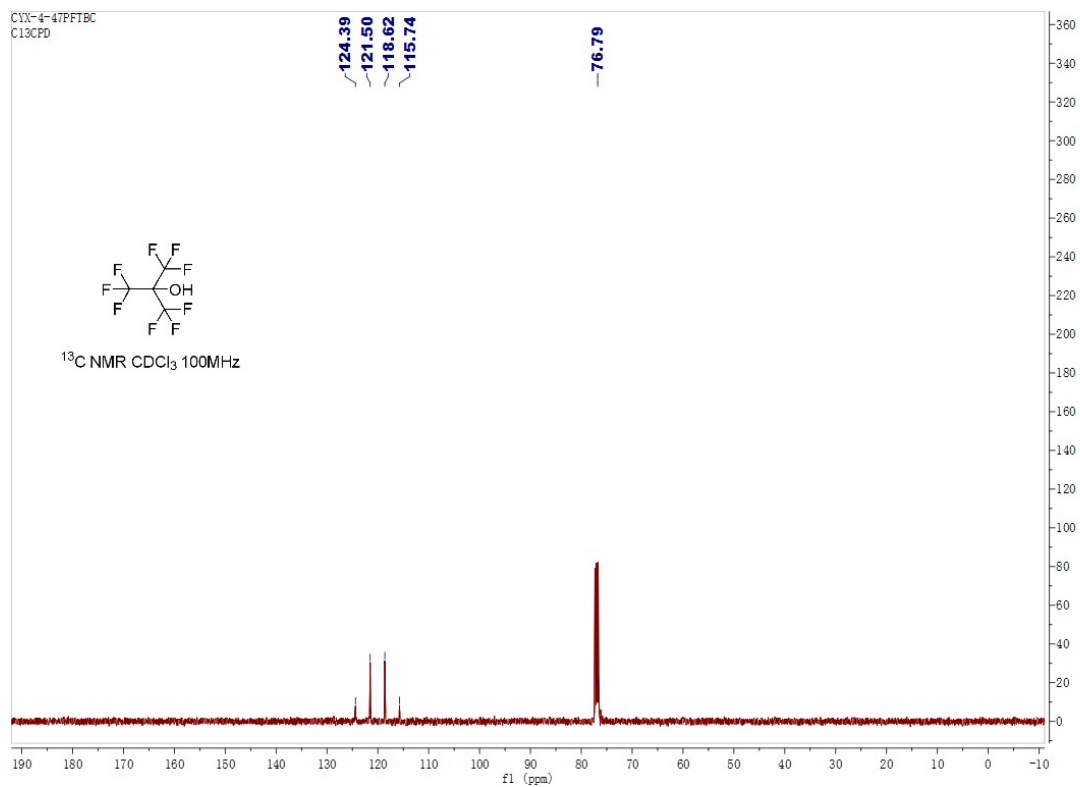

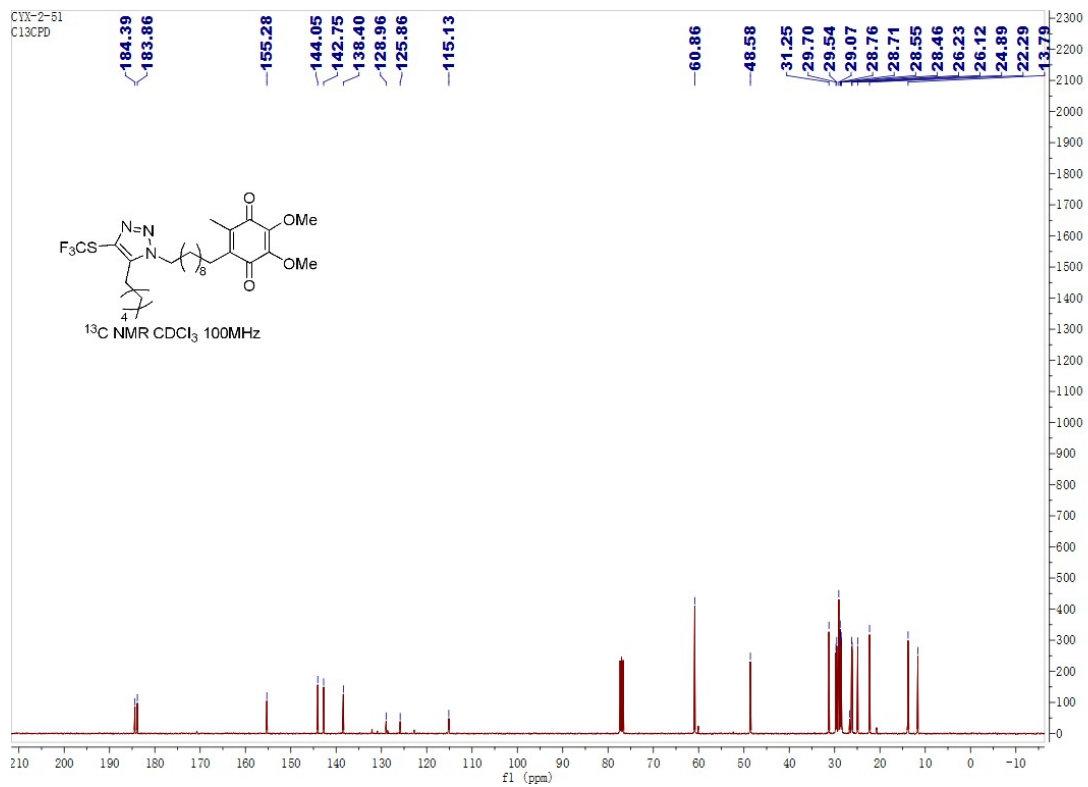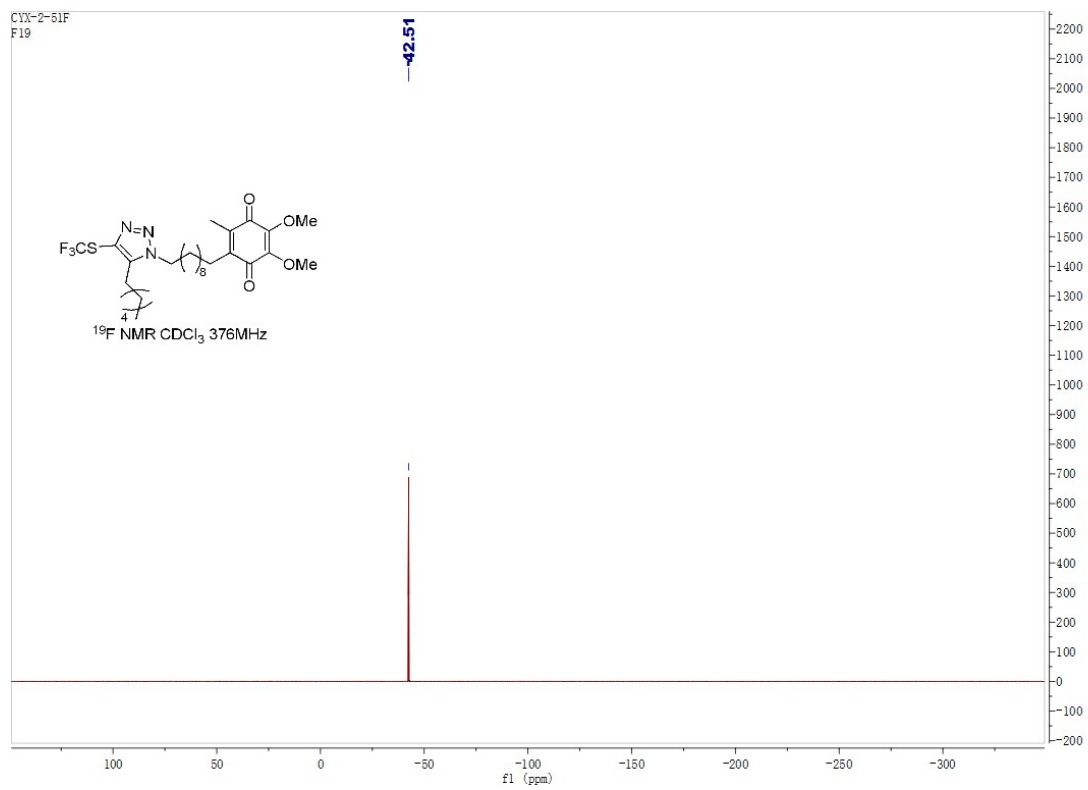

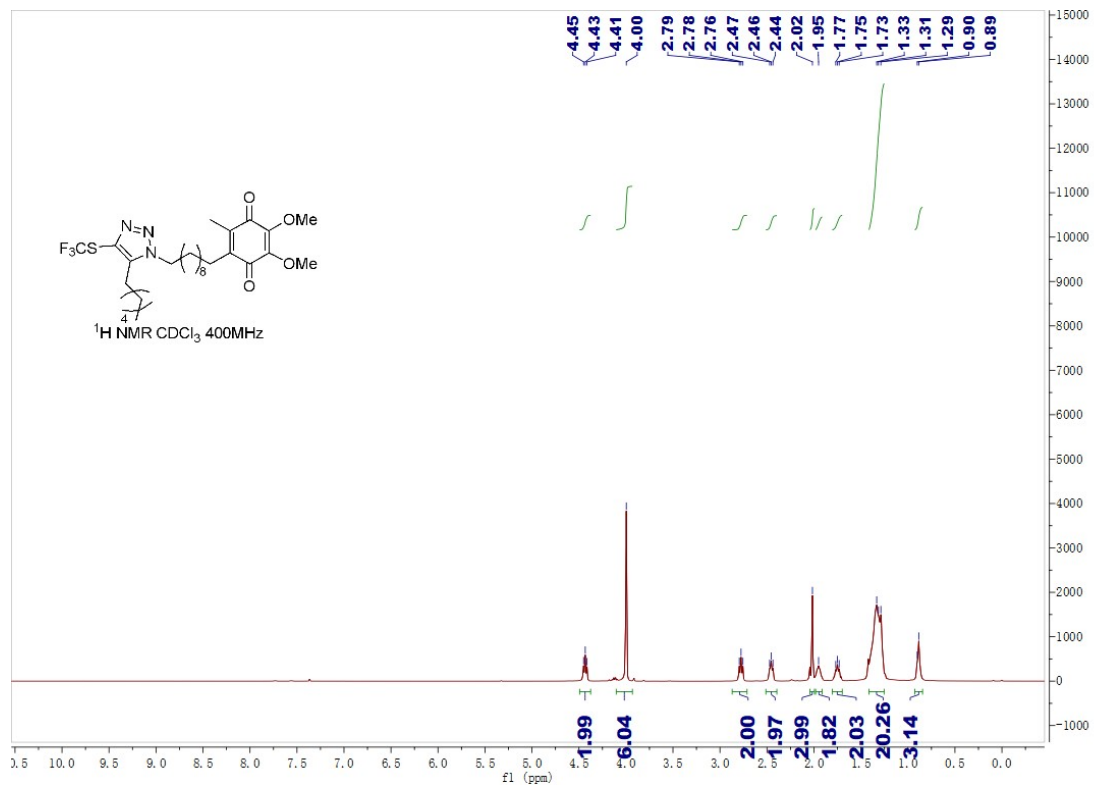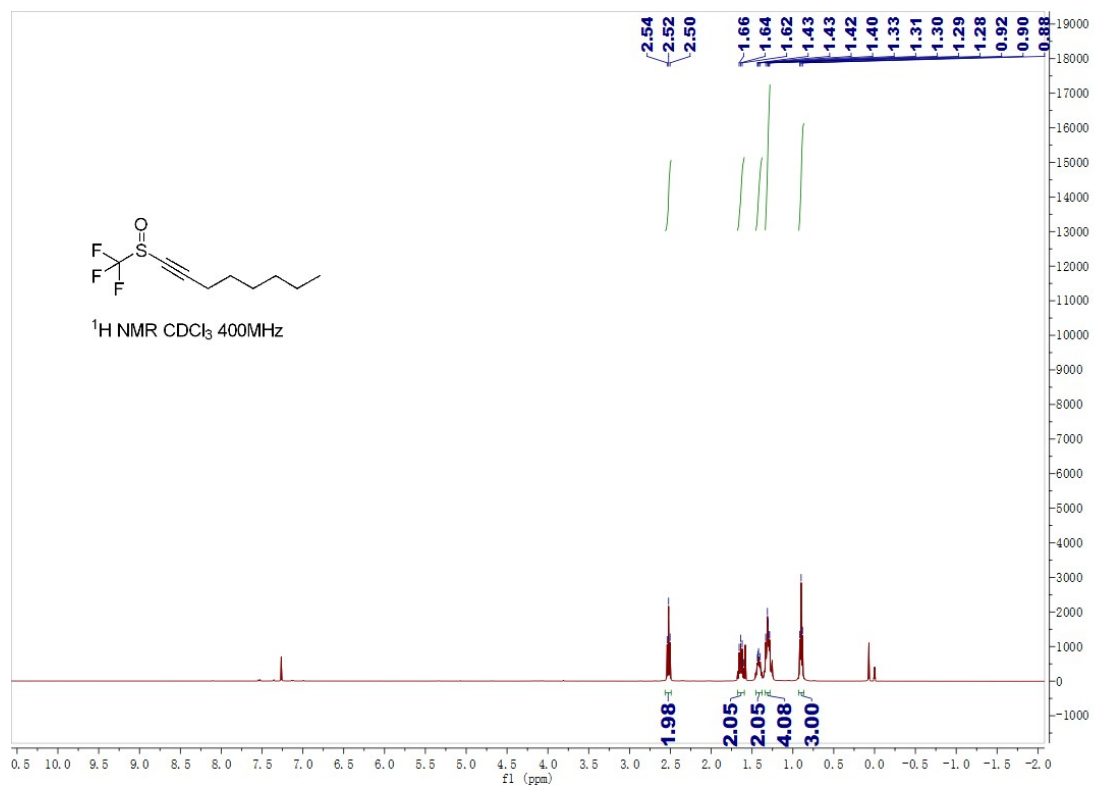

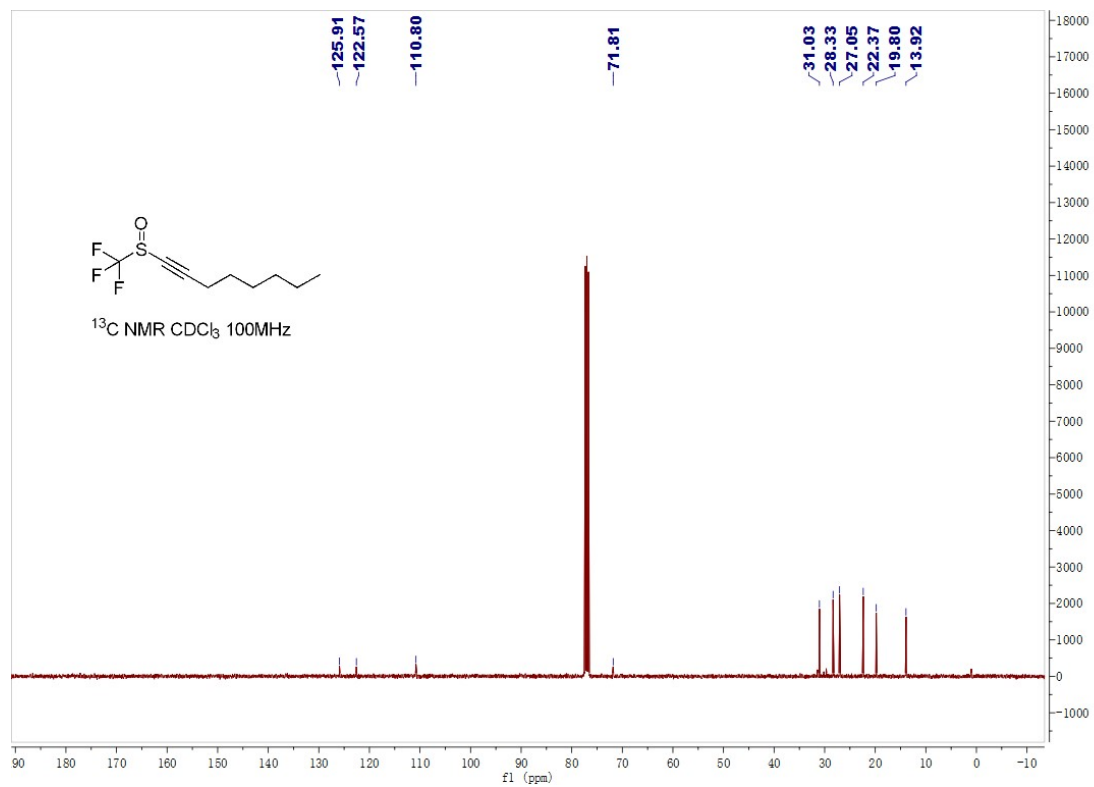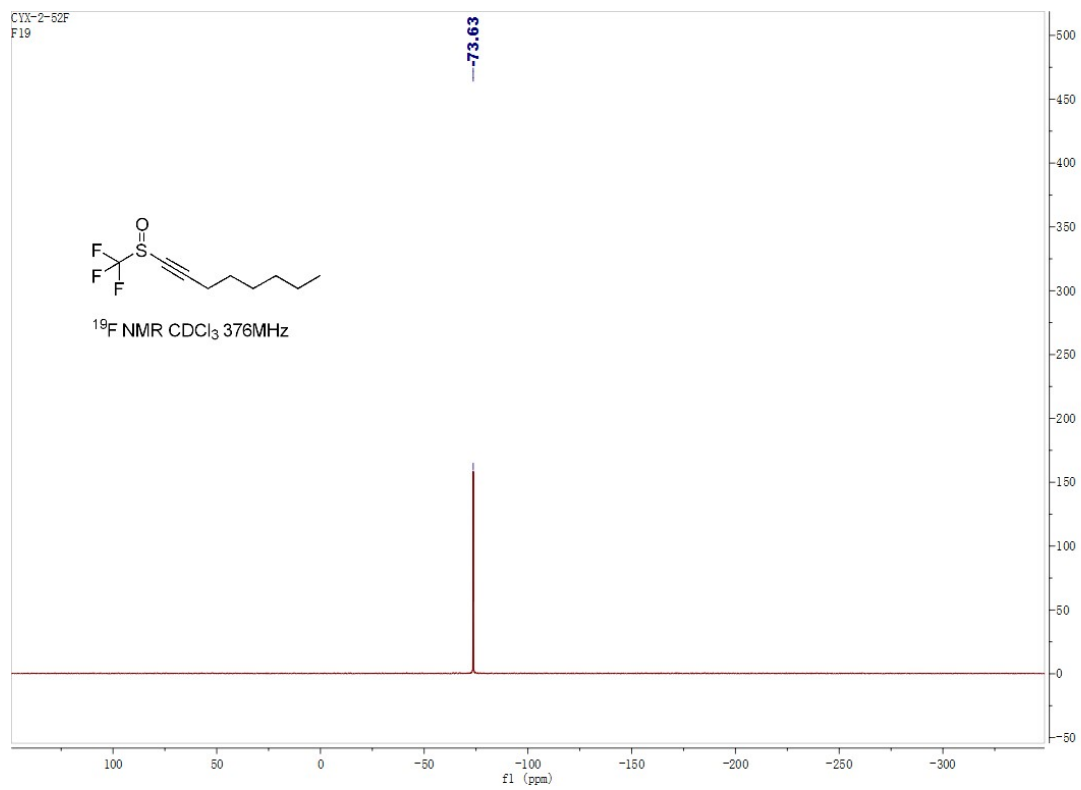

Supplement: d4gc00622d1.pdf [file d4gc00622d1.pdf]
